# Supplementary material for: Specific assembly of dihydrobenzofuran frameworks via Rh(iii)-catalysed C–H coupling of N-phenoxyacetamides with 2-alkenylphenols
Source: Royal Society of Chemistry journal article supplement (doi:10.1039/d2nj00175f), 2022-01-01

## *Supplementary Information*

# **Specific Assembly of Dihydrobenzofuran Frameworks via Rh(III)-Catalyzed C-H Coupling of *N*-Phenoxyacetamides with 2-Alkenylphenols**

Yinhui Wei,<sup>a,+</sup> Huiying Xu,<sup>a,+</sup> Fangyuan Chen,<sup>a</sup> Hui Gao,<sup>a</sup> Yugang Huang,<sup>a</sup> Wei Yi<sup>\*,a</sup> and Zhi Zhou<sup>\*,a</sup>

<sup>a</sup>Key Laboratory of Molecular Target & Clinical Pharmacology and State Key Laboratory of Respiratory Disease, School of Pharmaceutical Sciences and The Fifth Affiliated Hospital, Guangzhou Medical University, Guangzhou, Guangdong 511436, P. R. China

<sup>+</sup>These authors contributed equally.

<sup>\*</sup>E-mail: yiwei@gzhmu.edu.cn and zhouzhi@gzhmu.edu.cn

## **Contents**

|                                                                    |     |
|--------------------------------------------------------------------|-----|
| I. General.....                                                    | S2  |
| II. Experimental Information and Characterization Data.....        | S2  |
| III. Experimental Mechanistic Studies.....                         | S23 |
| IV. X-Ray Crystallographic Data.....                               | S27 |
| V. DFT Calculations.....                                           | S29 |
| VI. References.....                                                | S91 |
| VII. Copies of <sup>1</sup> H and <sup>13</sup> C NMR Spectra..... | S93 |

## I. General

NMR spectra were recorded on JEOL 400 NMR ( $^1\text{H}$  400 MHz;  $^{13}\text{C}$  100 MHz) in  $\text{CDCl}_3$ . Abbreviations for data quoted are s, singlet; brs, broad singlet; d, doublet; t, triplet; dd, doublet of doublets; m, multiplet. The residual solvent signals were used as references and the chemical shifts converted to the TMS scale ( $\text{CDCl}_3$ :  $\delta_{\text{H}} = 7.26$  ppm,  $\delta_{\text{C}} = 77.16$  ppm;  $\text{CD}_3\text{OD}$ :  $\delta_{\text{H}} = 3.31$  ppm,  $\delta_{\text{C}} = 49.00$  ppm;  $\text{DMSO}-d_6$ :  $\delta_{\text{H}} = 2.50$  ppm,  $\delta_{\text{C}} = 39.52$  ppm). Mass spectra and high-resolution mass spectra were measured on an agilent TOF-G6230B mass spectrometer and Thermo-DFS mass spectrometer. Thin-layer chromatographies were done on pre-coated silica gel 60 F254 plates (Merck). Silica gel 60H (200-300 mesh) and preparative TLC (200x200 mm, 0.2-0.25 mm in thickness) manufactured by Qingdao Haiyang Chemical Group Co. (China) were used for general chromatography. The enantiomeric excess (ee) of the products was determined by high-performance liquid chromatography (HPLC) with a chiral stationary phase in comparison with the authentic racemate sample. All the chiral stationary phases including Chiralcel IC-3 used in this study were purchased from Daicel Chiral Technologies.  $[\text{Cp}^*\text{IrCl}_2]_2$ ,  $[\text{Cp}^*\text{RhCl}_2]_2$ ,  $[\text{Ru}(p\text{-cymene})\text{Cl}_2]_2$ , and  $\text{Cp}^*\text{Co}(\text{CO})\text{I}_2$  were purchased from Aldrich and used without further purification. Other chemicals were purchased from commercial suppliers and were dried and purified when necessary. Chiral rhodium catalysts,<sup>S1</sup> *N*-phenoxy amides<sup>S2</sup> and the 2-alkenylphenols<sup>S3</sup> were prepared according to published procedures. Alternatively, these chiral rhodium catalysts can be also purchased from Daicel Chiral Technologies (China) Co., LTD. No attempts were made to optimize yields for substrate synthesis.

## II. Experimental Information and Characterization Data

### Optimization studies:

The mixture of *N*-phenoxy amide **1** (0.1 mmol, 1.0 equiv), 2-alkenylphenol **2a**, catalyst (2.5 mol %) and additives in the solvent was stirred at the specified temperature for 24 h without exclusion of air or moisture. Afterwards, it was diluted with EtOAc and filtered through a short silica gel column to remove the metal

residues. Then, the reaction mixture was concentrated and purified by preparative TLC (eluent: PE/EA = 5/1,  $R_f = 0.5$ ) to give the desired dihydrobenzofuran product **3a**.

**Table S1.** Conditions screening for the synthesis of dihydrobenzofuran derivative.<sup>a</sup>

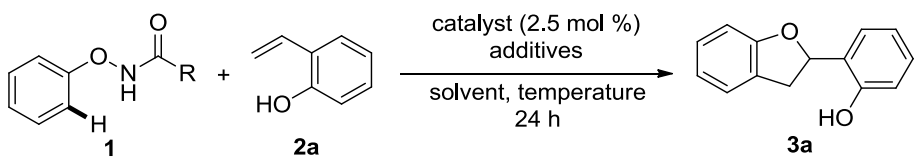

| Entry               | R               | Catalyst<br>(2.5 mol %)                              | Additive<br>(1 equiv)           | Tem.<br>(°C) | Solvent | Yield<br>(%) |
|---------------------|-----------------|------------------------------------------------------|---------------------------------|--------------|---------|--------------|
| 1                   | Me              | [Cp*RhCl <sub>2</sub> ] <sub>2</sub>                 | CsOAc                           | 60           | MeOH    | 23           |
| 2                   | Me              | [Cp*RhCl <sub>2</sub> ] <sub>2</sub>                 | CsOAc                           | 60           | MeCN    | <10          |
| 3                   | Me              | [Cp*RhCl <sub>2</sub> ] <sub>2</sub>                 | CsOAc                           | 60           | THF     | <10          |
| 4                   | Me              | [Cp*RhCl <sub>2</sub> ] <sub>2</sub>                 | CsOAc                           | 60           | dioxane | <10          |
| 5                   | Me              | [Cp*RhCl <sub>2</sub> ] <sub>2</sub>                 | CsOAc                           | 60           | toluene | <10          |
| 6                   | Me              | [Cp*RhCl <sub>2</sub> ] <sub>2</sub>                 | CsOAc                           | 60           | DCM     | 17           |
| 7                   | Me              | [Cp*RhCl <sub>2</sub> ] <sub>2</sub>                 | CsOAc                           | 60           | DMF     | <10          |
| 8                   | Me              | [Cp*RhCl <sub>2</sub> ] <sub>2</sub>                 | CsOAc                           | 60           | EtOH    | <10          |
| 9                   | Me              | [Cp*RhCl <sub>2</sub> ] <sub>2</sub>                 | CsOAc                           | 60           | acetone | 18           |
| 10                  | Me              | [Cp*RhCl <sub>2</sub> ] <sub>2</sub>                 | CsOAc                           | 40           | MeOH    | 31           |
| 11                  | Me              | [Cp*RhCl <sub>2</sub> ] <sub>2</sub>                 | CsOAc                           | rt           | MeOH    | 46           |
| 12                  | Me              | [Cp*RhCl <sub>2</sub> ] <sub>2</sub>                 | NaOAc                           | rt           | MeOH    | 32           |
| 13                  | Me              | [Cp*RhCl <sub>2</sub> ] <sub>2</sub>                 | Cs <sub>2</sub> CO <sub>3</sub> | rt           | MeOH    | <10          |
| 14                  | Me              | [Cp*RhCl <sub>2</sub> ] <sub>2</sub>                 | KOPiv                           | rt           | MeOH    | 20           |
| 15                  | Me              | [Cp*RhCl <sub>2</sub> ] <sub>2</sub>                 | K <sub>3</sub> PO <sub>4</sub>  | rt           | MeOH    | 30           |
| 16                  | Me              | [Cp*RhCl <sub>2</sub> ] <sub>2</sub>                 | Zn(OAc) <sub>2</sub>            | rt           | MeOH    | 57           |
| 17                  | Me              | [Cp*RhCl <sub>2</sub> ] <sub>2</sub>                 | AgOAc                           | rt           | MeOH    | 30           |
| 18                  | Me              | [Cp*RhCl <sub>2</sub> ] <sub>2</sub>                 | Cu(OAc) <sub>2</sub>            | rt           | MeOH    | 24           |
| 19                  | Me              | [Cp*RhCl <sub>2</sub> ] <sub>2</sub>                 | Et <sub>3</sub> N               | rt           | MeOH    | <10          |
| 20                  | Me              | [Cp*IrCl <sub>2</sub> ] <sub>2</sub>                 | Zn(OAc) <sub>2</sub>            | rt           | MeOH    | <10          |
| 21                  | Me              | [Ru( <i>p</i> -cymene)Cl <sub>2</sub> ] <sub>2</sub> | Zn(OAc) <sub>2</sub>            | rt           | MeOH    | n.d.         |
| 22 <sup>b</sup>     | Me              | Cp*Co(CO)I <sub>2</sub>                              | Zn(OAc) <sub>2</sub>            | rt           | MeOH    | n.d.         |
| 23                  | Et              | [Cp*RhCl <sub>2</sub> ] <sub>2</sub>                 | Zn(OAc) <sub>2</sub>            | rt           | MeOH    | 55           |
| 24                  | <sup>i</sup> Pr | [Cp*RhCl <sub>2</sub> ] <sub>2</sub>                 | Zn(OAc) <sub>2</sub>            | rt           | MeOH    | 21           |
| 25                  | Piv             | [Cp*RhCl <sub>2</sub> ] <sub>2</sub>                 | Zn(OAc) <sub>2</sub>            | rt           | MeOH    | n.d.         |
| 26                  | Ts              | [Cp*RhCl <sub>2</sub> ] <sub>2</sub>                 | Zn(OAc) <sub>2</sub>            | rt           | MeOH    | n.d.         |
| 27 <sup>c</sup>     | Me              | [Cp*RhCl <sub>2</sub> ] <sub>2</sub>                 | Zn(OAc) <sub>2</sub>            | rt           | MeOH    | 79           |
| 28 <sup>c,d</sup>   | Me              | [Cp*RhCl <sub>2</sub> ] <sub>2</sub>                 | Zn(OAc) <sub>2</sub>            | rt           | MeOH    | 87           |
| 29 <sup>c,d,e</sup> | Me              | [Cp*RhCl <sub>2</sub> ] <sub>2</sub>                 | Zn(OAc) <sub>2</sub>            | rt           | MeOH    | 60           |
| 30 <sup>c,d,f</sup> | Me              | [Cp*RhCl <sub>2</sub> ] <sub>2</sub>                 | Zn(OAc) <sub>2</sub>            | rt           | MeOH    | 35           |
| 31 <sup>g</sup>     | Me              | [Cp*RhCl <sub>2</sub> ] <sub>2</sub>                 | Zn(OPiv) <sub>2</sub>           | 0            | MeOH    | 85           |

<sup>a</sup>Reaction Conditions: **1** (0.1 mmol), **2a** (0.1 mmol), catalyst (2.5 mol %) and additive (1 equiv) in solvent (0.2 M) at specified temperature for 24 h without exclusion of air or moisture, isolated yield. <sup>b</sup>The reaction was conducted with 5 mol % of Cp\*Co(CO)I<sub>2</sub> under an atmosphere of N<sub>2</sub>. <sup>c</sup>**2a** (1.3 equiv). <sup>d</sup>MeOH (0.1 M). <sup>e</sup>K<sub>2</sub>CO<sub>3</sub> (1 equiv) was used as an additive. <sup>f</sup>HOAc (1 equiv) was used as an additive. <sup>g</sup>20 mol % of AgSbF<sub>6</sub> was used as an additive.

### General procedure for the synthesis of dihydrobenzofuran derivatives:

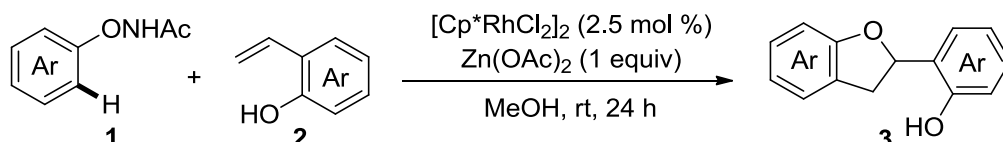

The mixture of *N*-aryloxyacetamides **1** (0.2 mmol, 1.0 equiv), 2-alkenylphenols **2** (0.26 mmol, 1.3 equiv), [Cp\*RhCl<sub>2</sub>]<sub>2</sub> (2.5 mol %) and Zn(OAc)<sub>2</sub> (0.2 mmol, 1.0 equiv) in MeOH (2.0 mL) was stirred at room temperature for 24 h without exclusion of air or moisture. Afterwards, the solvent was removed under reduced pressure, and the resulted mixture was purified by preparative TLC to afford the corresponding dihydrobenzofuran derivatives **3**.

### Characterization of products **3**:

#### 2-(2,3-dihydrobenzofuran-2-yl)phenol (**3a**)

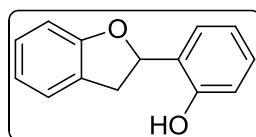

This compound was obtained in 87% yield (36.8 mg) as white solid. Eluent: PE/EA = 5/1, R<sub>f</sub> = 0.5.

<sup>1</sup>H NMR (400 MHz, CDCl<sub>3</sub>): δ 7.24-7.14 (m, 4H), 6.95-6.86 (m, 4H), 6.56 (s, 1H), 5.96-5.91 (m, 1H), 3.58 (dd, *J* = 15.5, 8.9 Hz, 1H), 3.33 (dd, *J* = 15.5, 9.9 Hz, 1H).

<sup>13</sup>C NMR (100 MHz, CDCl<sub>3</sub>): δ 158.7, 154.2, 129.4, 128.3, 127.1, 127.0, 126.0, 125.1, 121.5, 120.6, 116.9, 110.0, 83.4, 37.1.

HRMS (ESI) calculated for C<sub>14</sub>H<sub>13</sub>O<sub>2</sub> ([M+H]<sup>+</sup>): 213.0910; found: 213.0909.

**Scale-up synthesis of compound **3a**:** The mixture of *N*-phenoxyacetamides **1a** (2 mmol, 1.0 equiv), 2-alkenylphenol **2a** (2.6 mmol, 1.3 equiv), [Cp\*RhCl<sub>2</sub>]<sub>2</sub> (2.5 mol %)

and  $\text{Zn}(\text{OAc})_2$  (2 mmol, 1.0 equiv) in MeOH (20.0 mL) was stirred at room temperature for 24 h without exclusion of air or moisture. Afterwards, the solvent was removed under reduced pressure, and the resulted mixture was purified with silica gel column chromatography (eluent: PE/EA = 10/1) to afford the corresponding dihydrobenzofuran derivative **3a** in 75% (0.3180 g) isolated yield.

#### 4-methyl-2-(5-methyl-2,3-dihydrobenzofuran-2-yl)phenol (**3b**)

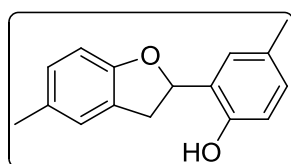

This compound was obtained in 76% yield (37.0 mg) as white solid. Eluent: PE/EA = 5/1,  $R_f = 0.6$ .

$^1\text{H NMR}$  (400 MHz,  $\text{CDCl}_3$ ):  $\delta$  7.05-6.94 (m, 4H), 6.81-6.76 (m, 2H), 6.43 (s, 1H), 5.88-5.82 (m, 1H), 3.50 (dd,  $J = 15.5, 8.9$  Hz, 1H), 3.28 (dd,  $J = 15.4, 10.1$  Hz, 1H), 2.30 (s, 3H), 2.27 (s, 3H).

$^{13}\text{C NMR}$  (100 MHz,  $\text{CDCl}_3$ ):  $\delta$  156.6, 152.1, 130.9, 129.8, 129.7, 128.6, 127.4, 127.2, 125.68, 125.65, 116.8, 109.6, 83.8, 37.3, 21.0, 20.7.

HRMS (ESI) calculated for  $\text{C}_{16}\text{H}_{17}\text{O}_2$  ( $[\text{M}+\text{H}]^+$ ): 241.1223; found: 241.1222.

#### 4-(*tert*-butyl)-2-(5-(*tert*-butyl)-2,3-dihydrobenzofuran-2-yl)phenol (**3c**)

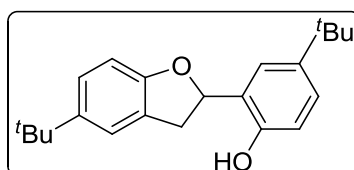

This compound was obtained in 80% yield (51.8 mg) as yellow oil. Eluent: PE/EA = 5/1,  $R_f = 0.7$ .

$^1\text{H NMR}$  (400 MHz,  $\text{CDCl}_3$ ):  $\delta$  7.28-7.17 (m, 4H), 6.85-6.81 (m, 2H), 6.55 (s, 1H), 5.90-5.84 (m, 1H), 3.53 (dd,  $J = 15.4, 8.7$  Hz, 1H), 3.35 (dd,  $J = 15.1, 10.8$  Hz, 1H), 1.31 (s, 9H), 1.29 (s, 9H).

$^{13}\text{C NMR}$  (100 MHz,  $\text{CDCl}_3$ ):  $\delta$  156.4, 152.2, 144.7, 143.2, 127.0, 126.3, 125.1,

124.8, 124.0, 122.1, 116.6, 109.3, 84.8, 37.5, 34.5, 34.3, 31.9, 31.7.

**HRMS (ESI)** calculated for C<sub>22</sub>H<sub>29</sub>O<sub>2</sub> ([M+H]<sup>+</sup>): 325.2162; found: 325.2166.

**4-fluoro-2-(5-fluoro-2,3-dihydrobenzofuran-2-yl)phenol (3d)**

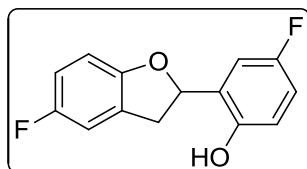

This compound was obtained in 81% yield (40.1 mg) as yellow oil. Eluent: PE/EA = 5/1, R<sub>f</sub> = 0.5.

**<sup>1</sup>H NMR (400 MHz, CDCl<sub>3</sub>):** δ 6.97 (dd, *J* = 9.0, 2.8 Hz, 1H), 6.94-6.76 (m, 5H), 6.17 (brs, 1H), 5.94-5.89 (m, 1H), 3.60 (dd, *J* = 15.8, 9.1 Hz, 1H), 3.24 (dd, *J* = 15.8, 9.2 Hz, 1H).

**<sup>13</sup>C NMR (100 MHz, CDCl<sub>3</sub>):** δ 158.1 (d, *J* = 236.8 Hz), 157.1 (d, *J* = 237.2 Hz), 154.7, 149.6, 128.1 (d, *J* = 9.0 Hz), 127.8 (d, *J* = 6.8 Hz), 117.5 (d, *J* = 7.9 Hz), 115.6 (d, *J* = 23.0 Hz), 114.6 (d, *J* = 24.2 Hz), 113.3 (d, *J* = 24.5 Hz), 112.3 (d, *J* = 24.8 Hz), 110.1 (d, *J* = 8.1 Hz), 82.6, 37.3.

**<sup>19</sup>F NMR (376 MHz, CDCl<sub>3</sub>):** δ -123.05, -123.34.

**HRMS (ESI)** calculated for C<sub>14</sub>H<sub>10</sub>F<sub>2</sub>O<sub>2</sub>Na ([M+Na]<sup>+</sup>): 271.0541; found: 271.0536.

**4-chloro-2-(5-chloro-2,3-dihydrobenzofuran-2-yl)phenol (3e)**

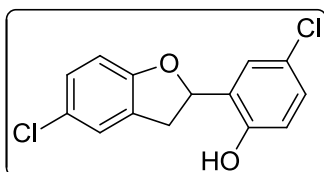

This compound was obtained in 70% yield (39.0 mg) as white solid. Eluent: PE/EA = 5/1, R<sub>f</sub> = 0.5.

**<sup>1</sup>H NMR (400 MHz, CDCl<sub>3</sub>):** δ 7.21 (s, 1H), 7.19-7.10 (m, 3H), 6.84-6.77 (m, 2H), 5.94-5.89 (m, 1H), 3.61 (dd, *J* = 15.9, 9.2 Hz, 1H), 3.22 (dd, *J* = 15.8, 9.1 Hz, 1H).

**<sup>13</sup>C NMR (100 MHz, CDCl<sub>3</sub>):** δ 157.4, 129.1, 128.6, 128.3, 128.2, 126.6, 126.3, 125.6, 125.3, 117.8, 110.8, 82.3, 37.0.

**HRMS (ESI)** calculated for  $C_{14}H_{10}Cl_2O_2Na$  ( $[M+Na]^+$ ): 302.9950; found: 302.9949.

**4-bromo-2-(5-bromo-2,3-dihydrobenzofuran-2-yl)phenol (3f)**

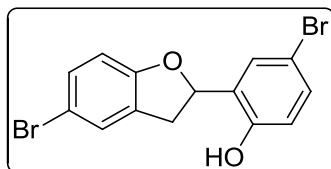

This compound was obtained in 76% yield (55.7 mg) as yellow oil. Eluent: PE/EA = 5/1,  $R_f = 0.4$ .

**$^1H$  NMR (400 MHz,  $CDCl_3$ ):**  $\delta$  7.35 (d,  $J = 2.0$  Hz, 1H), 7.30-7.25 (m, 3H), 6.78 (d,  $J = 8.4$  Hz, 1H), 6.73 (d,  $J = 8.5$  Hz, 1H), 5.93-5.88 (m, 1H), 3.61 (dd,  $J = 15.9, 9.2$  Hz, 1H), 3.21 (dd,  $J = 15.9, 9.1$  Hz, 1H).

**$^{13}C$  NMR (100 MHz,  $CDCl_3$ ):**  $\delta$  157.9, 152.7, 132.1, 131.2, 129.5, 129.1, 128.6, 128.1, 118.3, 113.4, 112.9, 111.4, 82.1, 36.9.

**HRMS (ESI)** calculated for  $C_{14}H_9Br_2O_2$  ( $[M-H]^-$ ): 366.8975; found: 366.8973.

**Methyl 2-(2-hydroxy-5-(methoxycarbonyl)phenyl)-2,3-dihydrobenzofuran-5-carboxylate (3g)**

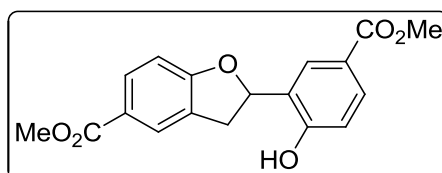

This compound was obtained in 47% yield (30.8 mg) as white solid. Eluent: PE/EA = 5/1,  $R_f = 0.4$ .

**$^1H$  NMR (400 MHz,  $CDCl_3$ ):**  $\delta$  7.98 (s, 1H), 7.96-7.90 (m, 3H), 6.96-6.86 (m, 3H), 6.09-6.04 (m, 1H), 3.90 (s, 3H), 3.88 (s, 3H), 3.71 (dd,  $J = 15.8, 9.3$  Hz, 1H), 3.31 (dd,  $J = 15.7, 9.3$  Hz, 1H).

**$^{13}C$  NMR (100 MHz,  $DMSO-d_6$ ):**  $\delta$  166.0, 165.9, 163.3, 158.7, 130.8, 130.7, 128.0, 127.8, 127.3, 126.6, 122.3, 120.2, 115.4, 109.0, 80.5, 51.8, 51.7, 35.8.

**HRMS (ESI)** calculated for  $C_{18}H_{17}O_6$  ( $[M+H]^+$ ): 329.1020; found: 329.1015.

#### 4-nitro-2-(5-nitro-2,3-dihydrobenzofuran-2-yl)phenol (3h)

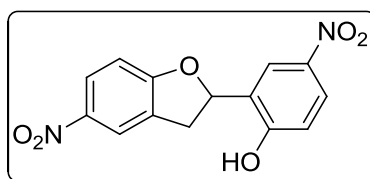

This compound was obtained in 37% yield (22.4 mg) as yellow solid. Eluent: PE/EA = 10/1,  $R_f = 0.4$ .

**$^1\text{H}$  NMR (400 MHz,  $\text{CD}_3\text{OD}$ ):**  $\delta$  8.18-8.09 (m, 4H), 7.06 (d,  $J = 9.4$  Hz, 1H), 6.96 (d,  $J = 8.8$  Hz, 1H), 6.19-6.13 (m, 1H), 3.87 (dd,  $J = 16.5, 10.0$  Hz, 1H), 3.17 (dd,  $J = 16.6, 7.3$  Hz, 1H).

**$^{13}\text{C}$  NMR (100 MHz,  $\text{DMSO}-d_6$ ):**  $\delta$  164.6, 161.0, 141.6, 139.3, 129.0, 128.1, 125.7, 122.1, 121.4, 115.9, 109.3, 81.6, 35.3.

**HRMS (ESI)** calculated for  $\text{C}_{14}\text{H}_9\text{N}_2\text{O}_6$  ( $[\text{M}-\text{H}]^-$ ): 301.0466; found: 301.0465.

#### 5-fluoro-2-(6-fluoro-2,3-dihydrobenzofuran-2-yl)phenol (3i)

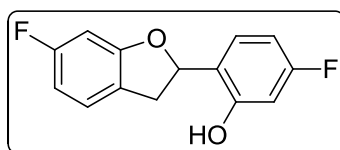

This compound was obtained in 62% yield (30.7 mg) as yellow oil. Eluent: PE/EA = 5/1,  $R_f = 0.6$ .

**$^1\text{H}$  NMR (400 MHz,  $\text{CD}_3\text{OD}$ ):**  $\delta$  7.17-7.09 (m, 2H), 6.64 (d,  $J = 8.2$  Hz, 1H), 6.60-6.48 (m, 2H), 6.44 (dd,  $J = 9.8, 2.0$  Hz, 1H), 6.27-6.23 (m, 1H), 3.47-3.32 (m, 2H).

**$^{13}\text{C}$  NMR (100 MHz,  $\text{CDCl}_3$ ):**  $\delta$  163.1 (d,  $J = 243.2$  Hz), 160.4 (d,  $J = 244.3$  Hz), 158.8 (d,  $J = 12.8$  Hz), 156.2 (d,  $J = 5.8$  Hz), 130.0 (d,  $J = 11.1$  Hz), 125.3 (d,  $J = 8.0$  Hz), 122.8 (d,  $J = 2.6$  Hz), 113.4 (d,  $J = 2.8$  Hz), 112.6 (d,  $J = 15.5$  Hz), 108.8 (d,  $J = 22.4$  Hz), 107.2 (d,  $J = 21.8$  Hz), 99.1 (d,  $J = 26.6$  Hz), 81.8 (d,  $J = 5.7$  Hz), 36.7.

**$^{19}\text{F}$  NMR (376 MHz,  $\text{CDCl}_3$ ):**  $\delta$  -117.15, -117.40.

**HRMS (ESI)** calculated for  $\text{C}_{14}\text{H}_{11}\text{F}_2\text{O}_2$  ( $[\text{M}+\text{H}]^+$ ): 249.0722; found: 249.0720.

#### 5-chloro-2-(6-chloro-2,3-dihydrobenzofuran-2-yl)phenol (3j)



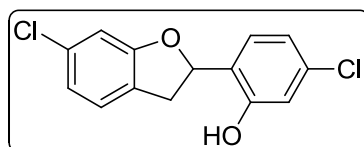

This compound was obtained in 73% yield (40.8 mg) as white solid. Eluent: PE/EA = 5/1,  $R_f$  = 0.6.

**$^1\text{H}$  NMR (400 MHz,  $\text{CDCl}_3$ ):**  $\delta$  7.14 (d,  $J$  = 8.2 Hz, 1H), 7.10 (d,  $J$  = 8.3 Hz, 1H), 6.92-6.87 (m, 3H), 6.87 (d,  $J$  = 1.7 Hz, 1H), 6.38 (brs, 1H), 5.96-5.91 (m, 1H), 3.56 (dd,  $J$  = 15.7, 9.1 Hz, 1H), 3.19 (dd,  $J$  = 15.7, 9.2 Hz, 1H).

**$^{13}\text{C}$  NMR (100 MHz,  $\text{CDCl}_3$ ):**  $\delta$  159.5, 154.4, 134.6, 133.7, 127.8, 125.6, 125.5, 125.0, 121.7, 121.0, 117.0, 110.7, 83.1, 36.5.

**HRMS (ESI)** calculated for  $\text{C}_{14}\text{H}_9\text{Cl}_2\text{O}_2$  ( $[\text{M}-\text{H}]^-$ ): 278.9985; found: 278.9984.

### 2-methyl-6-(7-methyl-2,3-dihydrobenzofuran-2-yl)phenol (3k)

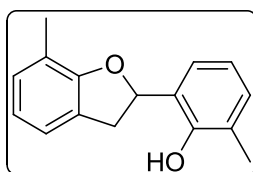

This compound was obtained in 72% yield (34.6 mg) as yellow oil. Eluent: PE/EA = 10/1,  $R_f$  = 0.5.

**$^1\text{H}$  NMR (400 MHz,  $\text{CDCl}_3$ ):**  $\delta$  7.10 (d,  $J$  = 7.4 Hz, 1H), 7.05 (d,  $J$  = 7.3 Hz, 1H), 7.02-6.96 (m, 3H), 6.86-6.79 (m, 2H), 5.90-5.84 (m, 1H), 3.52 (dd,  $J$  = 15.4, 8.8 Hz, 1H), 3.36 (dd,  $J$  = 15.3, 10.7 Hz, 1H), 2.26 (s, 6H).

**$^{13}\text{C}$  NMR (100 MHz,  $\text{CDCl}_3$ ):**  $\delta$  156.8, 153.0, 130.8, 129.6, 126.5, 125.8, 124.8, 124.7, 122.4, 121.7, 120.4, 120.0, 84.5, 37.4, 16.0, 15.4.

**HRMS (ESI)** calculated for  $\text{C}_{16}\text{H}_{17}\text{O}_2$  ( $[\text{M}+\text{H}]^+$ ): 241.1223; found: 241.1221.

### 2-bromo-6-(7-bromo-2,3-dihydrobenzofuran-2-yl)phenol (3l)

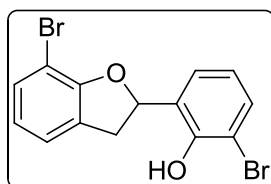

This compound was obtained in 79% yield (57.9 mg) as yellow oil. Eluent: PE/EA = 5/1,  $R_f = 0.6$ .

$^1\text{H NMR}$  (400 MHz,  $\text{CDCl}_3$ ):  $\delta$  7.40 (dd,  $J = 8.0, 1.4$  Hz, 1H), 7.35 (d,  $J = 8.4$  Hz, 1H), 7.31 (d,  $J = 8.0$  Hz, 1H), 7.08 (dd,  $J = 7.3, 1.1$  Hz, 1H), 6.82 (t,  $J = 8.0$  Hz, 1H), 6.76 (t,  $J = 8.0$  Hz, 1H), 6.11-6.04 (m, 1H), 5.84 (s, 1H), 3.81 (dd,  $J = 15.9, 9.7$  Hz, 1H), 3.21 (dd,  $J = 15.9, 7.4$  Hz, 1H).

$^{13}\text{C NMR}$  (100 MHz,  $\text{CDCl}_3$ ):  $\delta$  156.8, 148.8, 131.4, 131.3, 129.3, 128.0, 125.7, 124.1, 122.4, 121.8, 110.7, 102.7, 80.5, 38.2.

HRMS (ESI) calculated for  $\text{C}_{14}\text{H}_{10}\text{Br}_2\text{O}_2\text{Na}$  ( $[\text{M}+\text{Na}]^+$ ): 390.8940; found: 390.8948.

**2-(5-methyl-2,3-dihydrobenzofuran-2-yl)phenol (3m)** &  
**2-(2,3-dihydrobenzofuran-2-yl)-4-methylphenol (3m')**

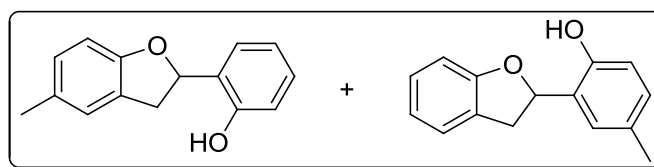

This compound was obtained in 90% yield (40.6 mg) as white solid by using 4-methyl substituted *N*-phenoxyacetamide with 2-alkenylphenol **2a**. An inseparable mixture of two isomers was obtained, and the ratio was determined to be 1/0.6 by  $^1\text{H-NMR}$  analysis. Eluent: PE/EA = 5/1,  $R_f = 0.6$ .

$^1\text{H NMR}$  (400 MHz,  $\text{CD}_3\text{OD}$ ):  $\delta$  7.27 (d,  $J = 7.6$  Hz, 0.6H), 7.16-7.06 (m, 3.6H), 6.96 (s, 0.6H), 6.92-6.89 (m, 1.6H), 6.85-6.74 (m, 3.2H), 6.70-6.67 (m, 1.6H), 5.97-5.92 (m, 1.6H), 3.67-3.57 (m, 1.6H), 3.05-2.95 (m, 1.6H), 2.25 (s, 1.8H), 2.19 (s, 3H).

$^{13}\text{C NMR}$  (100 MHz,  $\text{CD}_3\text{OD}$ ):  $\delta$  161.1, 159.0, 152.9, 130.3, 129.84, 129.81, 129.5, 129.4, 129.2, 128.9, 128.21, 128.17, 127.1, 126.6, 126.0, 121.6, 120.3, 115.9, 109.9, 109.5, 80.9, 38.52, 38.48, 20.9, 20.7.

HRMS (ESI) calculated for  $\text{C}_{15}\text{H}_{15}\text{O}_3$  ( $[\text{M}+\text{H}]^+$ ): 227.1067; found: 227.1063.

Another batch of reaction was conducted by using 4-methyl substituted 2-alkenylphenol with *N*-phenoxyacetamide **1a**, the desired compound was obtained in

81% yield (36.6 mg) as white solid, and the ratio was determined to be  $3\mathbf{m}/3\mathbf{m}' = 0.8/1$  by  $^1\text{H-NMR}$  analysis.

**2-(5-(*tert*-butyl)-2,3-dihydrobenzofuran-2-yl)phenol (3n)** &  
**4-(*tert*-butyl)-2-(2,3-dihydrobenzofuran-2-yl)phenol (3n')**

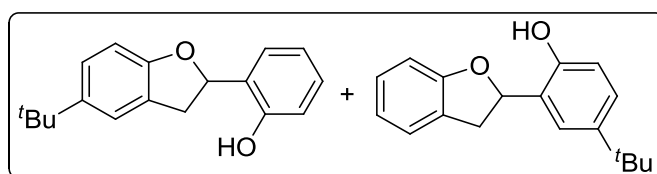

This compound was obtained in 86% yield (46.0 mg) as white solid by using 4-*t*Bu substituted *N*-phenoxyacetamide with 2-alkenylphenol **2a**. Eluent: PE/EA = 5/1,  $R_f = 0.6$ . An inseparable mixture of two regioisomers was obtained, and the ratio was determined to be 1/0.75 by  $^1\text{H-NMR}$  analysis.

$^1\text{H NMR}$  (400 MHz,  $\text{CD}_3\text{OD}$ ):  $\delta$  7.35 (d,  $J = 2.2$  Hz, 1H), 7.27 (d,  $J = 7.6$  Hz, 0.75H), 7.20 (s, 0.75H), 7.16-7.06 (m, 4.5H), 6.85-6.70 (m, 5.25H), 5.98-5.93 (m, 1.75H), 3.66-3.59 (m, 1.75H), 3.07-2.97 (m, 1.75H), 1.28 (s, 6.75H), 1.22 (s, 9H).

$^{13}\text{C NMR}$  (100 MHz,  $\text{CD}_3\text{OD}$ ):  $\delta$  161.1, 158.8, 155.2, 152.9, 144.7, 143.0, 130.3, 129.4, 129.1, 128.9, 128.3, 127.8, 126.7, 126.2, 126.0, 125.6, 123.5, 123.0, 121.6, 120.4, 115.9, 115.6, 109.9, 109.1, 81.4, 81.0, 38.7, 38.5, 35.1, 34.9, 32.2, 32.1.

**HRMS (ESI)** calculated for  $\text{C}_{18}\text{H}_{21}\text{O}_2$  ( $[\text{M}+\text{H}]^+$ ): 269.1536; found: 269.1532.

Another batch of reaction was conducted by using 4-*t*Bu substituted 2-alkenylphenol with *N*-phenoxyacetamide **1a**, the desired compound was obtained in 72% yield (38.6 mg) as white solid, and the ratio was determined to be  $3\mathbf{n}/3\mathbf{n}' = 0.5/1$  by  $^1\text{H-NMR}$  analysis.

**2-(5-fluoro-2,3-dihydrobenzofuran-2-yl)phenol (3o)** &  
**2-(2,3-dihydrobenzofuran-2-yl)-4-fluorophenol (3o')**

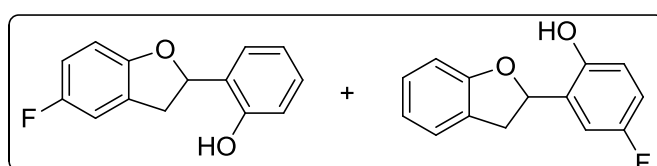

This compound was obtained in 66% yield (30.3 mg) as yellow solid by using 4-F substituted *N*-phenoxyacetamide with 2-alkenylphenol **2a**. Eluent: PE/EA = 5/1,  $R_f$  = 0.7. An inseparable mixture of two regioisomers was obtained, and the ratio was determined to be 1/1 by  $^1\text{H-NMR}$  analysis.

$^1\text{H NMR}$  (400 MHz,  $\text{CDCl}_3$ ):  $\delta$  7.26-7.15 (m, 4H), 6.98-6.77 (m, 10H), 6.39 (brs, 2H), 5.99-5.93 (m, 1H), 5.92-5.87 (m, 1H), 3.65-3.53 (m, 2H), 3.35-3.21 (m, 2H).

$^{13}\text{C NMR}$  (100 MHz,  $\text{CDCl}_3$ ):  $\delta$  158.6, 158.1 (d,  $J = 236.8$  Hz), 157.0 (d,  $J = 236.9$  Hz), 154.7, 154.0, 149.8, 129.6, 128.6 (d,  $J = 8.9$  Hz), 128.4, 127.9 (d,  $J = 6.5$  Hz), 126.9, 126.6, 125.9, 125.2, 121.6, 120.7, 117.5 (d,  $J = 7.9$  Hz), 116.8, 115.5 (d,  $J = 23.0$  Hz), 114.4 (d,  $J = 24.0$  Hz), 113.4 (d,  $J = 24.6$  Hz), 112.3 (d,  $J = 24.8$  Hz), 110.12, 110.04, 109.97, 83.8, 82.2, 37.3, 37.1.

$^{19}\text{F NMR}$  (376 MHz,  $\text{CDCl}_3$ ):  $\delta$  -123.15, -123.48.

**HRMS (ESI)** calculated for  $\text{C}_{14}\text{H}_{12}\text{FO}_2$  ( $[\text{M}+\text{H}]^+$ ): 231.0816; found: 231.0816.

Another batch of reaction was conducted by using 4-F substituted 2-alkenylphenol with *N*-phenoxyacetamide **1a**, the desired compound was obtained in 82% yield (37.7 mg) as white solid, and the ratio was determined to be  $\mathbf{3o}/\mathbf{3o}' = 1/1$  by  $^1\text{H-NMR}$  analysis.

### 2-(5-(trifluoromethyl)-2,3-dihydrobenzofuran-2-yl)phenol (**3p**)

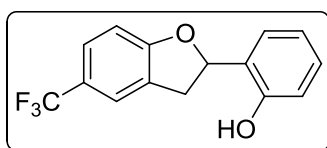

This compound was obtained in 36% yield (20.0 mg) as white solid. Eluent: PE/EA = 5/1,  $R_f$  = 0.65.

$^1\text{H NMR}$  (400 MHz,  $\text{CDCl}_3$ ):  $\delta$  7.46-7.44 (m, 2H), 7.29-7.25 (m, 1H), 7.24-7.19 (m, 1H), 6.96-6.92 (m, 2H), 6.85 (d,  $J = 8.1$  Hz, 1H), 6.09-6.03 (m, 1H), 5.86 (brs, 1H), 3.66 (dd,  $J = 15.9, 9.3$  Hz, 1H), 3.32 (dd,  $J = 15.9, 9.0$  Hz, 1H).

$^{13}\text{C NMR}$  (100 MHz,  $\text{CDCl}_3$ ):  $\delta$  161.7, 153.5, 129.6, 128.0, 126.8, 126.33, 126.29, 124.6 (q,  $J = 269.9$  Hz), 123.7 (q,  $J = 32.2$  Hz), 123.3, 122.5 (d,  $J = 3.4$  Hz), 121.0, 116.5, 109.7, 83.1, 36.5.

**$^{19}\text{F}$  NMR (376 MHz,  $\text{CDCl}_3$ ):**  $\delta$  -61.01.

**HRMS (ESI)** calculated for  $\text{C}_{15}\text{H}_{10}\text{F}_3\text{O}_2$  ( $[\text{M}-\text{H}]^-$ ): 279.0638; found: 279.0635.

**2-(2,3-dihydrobenzofuran-2-yl)-4-(trifluoromethyl)phenol (3p')**

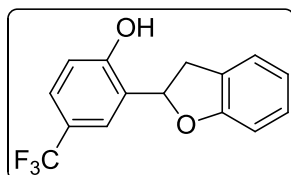

This compound was obtained in 25% yield (14.0 mg) as white solid. Eluent: PE/EA = 5/1,  $R_f$  = 0.55.

**$^1\text{H}$  NMR (400 MHz,  $\text{CDCl}_3$ ):**  $\delta$  7.51 (s, 1H), 7.46 (d,  $J$  = 8.3 Hz, 1H), 7.26-7.17 (m, 2H), 6.97-6.92 (m, 3H), 5.98-5.92 (m, 1H), 3.65 (dd,  $J$  = 15.5, 9.1 Hz, 1H), 3.28 (dd,  $J$  = 15.5, 9.7 Hz, 1H).

**$^{13}\text{C}$  NMR (100 MHz,  $\text{CDCl}_3$ ):**  $\delta$  158.5, 157.0, 128.5, 126.9, 126.8, 126.6, 125.2, 124.4 (q,  $J$  = 269.4 Hz), 124.3 (q,  $J$  = 3.5 Hz), 122.8 (q,  $J$  = 32.5 Hz), 121.8, 116.9, 110.1, 82.5, 37.2.

**$^{19}\text{F}$  NMR (376 MHz,  $\text{CDCl}_3$ ):**  $\delta$  -61.32.

**HRMS (ESI)** calculated for  $\text{C}_{15}\text{H}_{10}\text{F}_3\text{O}_2$  ( $[\text{M}-\text{H}]^-$ ): 279.0638; found: 279.0637.

**$^1\text{H}$ - $^1\text{H}$  NOESY:**

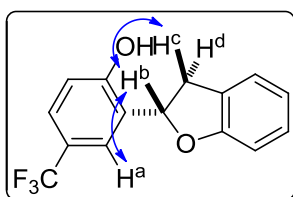

**methyl 2-(2-hydroxyphenyl)-2,3-dihydrobenzofuran-5-carboxylate (3q)**

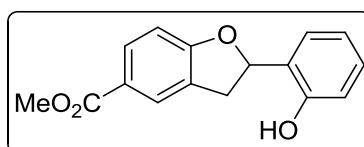

This compound was obtained in 36% yield (19.5 mg) as white solid. Eluent: PE/EA = 5/1,  $R_f$  = 0.45.

**$^1\text{H}$  NMR (400 MHz,  $\text{CD}_3\text{OD}$ ):**  $\delta$  7.87 (dd,  $J$  = 8.4, 1.8 Hz, 1H), 7.83 (d,  $J$  = 1.2 Hz,

1H), 7.24 (dd,  $J = 7.5, 1.4$  Hz, 1H), 7.11 (td,  $J = 7.9, 1.7$  Hz, 1H), 6.87 (d,  $J = 8.4$  Hz, 1H), 6.83-6.76 (m, 2H), 6.08 (dd,  $J = 9.6, 7.8$  Hz, 1H), 3.84 (s, 3H), 3.69 (dd,  $J = 16.0, 9.7$  Hz, 1H), 3.09 (dd,  $J = 16.0, 7.7$  Hz, 1H).

$^{13}\text{C}$  NMR (100 MHz,  $\text{CD}_3\text{OD}$ ):  $\delta$  168.6, 165.5, 155.4, 132.1, 129.8, 129.3, 129.2, 127.8, 126.7, 123.7, 120.4, 116.0, 109.8, 82.7, 52.3, 37.6.

HRMS (ESI) calculated for  $\text{C}_{16}\text{H}_{15}\text{O}_4$  ( $[\text{M}+\text{H}]^+$ ): 271.0965; found: 271.0959.

Another batch of reaction was conducted by using 4- $\text{CO}_2\text{Me}$  substituted 2-alkenylphenol with *N*-phenoxyacetamide **1a**, the desired compound was obtained in 44% yield (24.0 mg) as white solid.

### methyl 3-(2,3-dihydrobenzofuran-2-yl)-4-hydroxybenzoate (**3q'**)

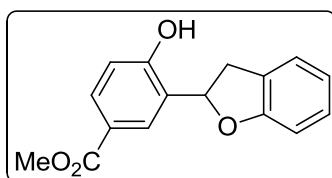

This compound was obtained in 24% yield (13.0 mg) as white solid. Eluent: PE/EA = 5/1,  $R_f = 0.4$ .

$^1\text{H}$  NMR (400 MHz,  $\text{CDCl}_3$ ):  $\delta$  7.95-7.85 (m, 2H), 7.24-7.15 (m, 2H), 6.97-6.92 (m, 3H), 5.98-5.93 (m, 1H), 3.87 (s, 3H), 3.62 (dd,  $J = 15.5, 8.9$  Hz, 1H), 3.32 (dd,  $J = 15.5, 10.0$  Hz, 1H).

$^{13}\text{C}$  NMR (100 MHz,  $\text{CDCl}_3$ ):  $\delta$  167.0, 158.8, 158.4, 131.4, 129.1, 128.5, 126.7, 125.8, 125.2, 122.5, 121.9, 117.0, 110.1, 83.3, 52.2, 37.2.

HRMS (ESI) calculated for  $\text{C}_{16}\text{H}_{15}\text{O}_4$  ( $[\text{M}+\text{H}]^+$ ): 271.0965; found: 271.0961.

Another batch of reaction was conducted by using 4- $\text{CO}_2\text{Me}$  substituted 2-alkenylphenol with *N*-phenoxyacetamide **1a**, the desired compound was obtained in 13% yield (7.0 mg) as white solid.

### 2-(5-nitro-2,3-dihydrobenzofuran-2-yl)phenol (**3r**)

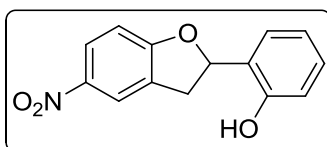

This compound was obtained in 31% yield (16.0 mg) as yellow solid. Eluent: PE/EA = 5/1,  $R_f = 0.4$ .

**$^1\text{H}$  NMR (400 MHz,  $\text{CD}_3\text{OD}$ ):**  $\delta$  8.12 (d,  $J = 8.8$  Hz, 1H), 8.08 (s, 1H), 7.24 (d,  $J = 7.6$  Hz, 1H), 7.13 (t,  $J = 7.7$  Hz, 1H), 6.93 (d,  $J = 8.8$  Hz, 1H), 6.84-6.77 (m, 2H), 6.19-6.10 (m, 1H), 3.74 (dd,  $J = 16.3, 9.7$  Hz, 1H), 3.19 (dd,  $J = 16.3, 7.7$  Hz, 1H).

**$^{13}\text{C}$  NMR (100 MHz,  $\text{CD}_3\text{OD}$ ):**  $\delta$  166.8, 155.6, 143.2, 130.5, 130.2, 128.6, 127.0, 126.6, 122.2, 120.4, 116.2, 109.9, 84.1, 37.3.

**HRMS (ESI)** calculated for  $\text{C}_{14}\text{H}_{12}\text{NO}_4$  ( $[\text{M}+\text{H}]^+$ ): 258.0761; found: 258.0760.

**$^1\text{H}$ - $^1\text{H}$  NOESY:**

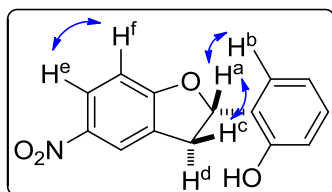

### 2-(5-nitro-2,3-dihydrobenzofuran-2-yl)phenol (**3r'**)

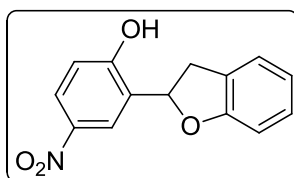

This compound was obtained by using 4- $\text{NO}_2$  substituted 2-alkenylphenol with *N*-phenoxyacetamide **1a**, affording the desired product **3r'** in 64% yield (32.8 mg) as yellow solid. Eluent: PE/EA = 5/1,  $R_f = 0.4$ .

**$^1\text{H}$  NMR (400 MHz,  $\text{CD}_3\text{OD}$ ):**  $\delta$  8.19 (d,  $J = 2.3$  Hz, 1H), 8.05 (dd,  $J = 8.9, 2.6$  Hz, 1H), 7.17-7.12 (m, 2H), 6.92-6.89 (m, 2H), 6.85 (t,  $J = 7.4$  Hz, 1H), 5.99-5.89 (m, 1H), 3.74 (dd,  $J = 15.9, 9.6$  Hz, 1H), 2.99 (dd,  $J = 15.8, 7.3$  Hz, 1H).

**$^{13}\text{C}$  NMR (100 MHz,  $\text{CD}_3\text{OD}$ ):**  $\delta$  162.4, 160.7, 141.2, 131.8, 129.2, 127.5, 126.1, 125.9, 122.8, 122.0, 116.3, 110.2, 80.0, 38.2.

**HRMS (ESI)** calculated for  $\text{C}_{14}\text{H}_{12}\text{NO}_4$  ( $[\text{M}+\text{H}]^+$ ): 258.0761; found: 258.0759.

**<sup>1</sup>H-<sup>1</sup>H NOESY:**

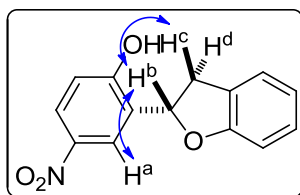

**2-(2,3-dihydronaphtho[2,3-*b*]furan-2-yl)phenol (3s) &**

**3-(2,3-dihydrobenzofuran-2-yl)naphthalen-2-ol (3s')**

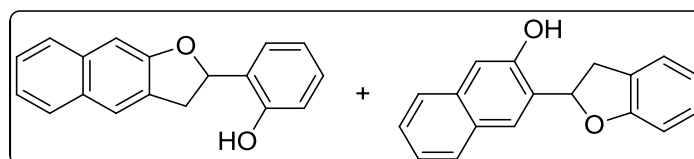

This compound was obtained in 57% yield (29.9 mg) as white solid. Eluent: PE/EA = 5/1, R<sub>f</sub> = 0.3. An inseparable mixture of two regioisomers was obtained, and the ratio was determined to be **3s/3s'** = 1/0.33 by <sup>1</sup>H-NMR analysis.

**<sup>1</sup>H NMR (400 MHz, CDCl<sub>3</sub>):** δ 7.78-7.71 (m, 2.66H), 7.68 (s, 0.33H), 7.65 (s, 1H), 7.39 (t, *J* = 7.2 Hz, 1.33H), 7.31 (t, *J* = 7.5 Hz, 1.33H), 7.27-7.16 (m, 4H), 6.98-6.86 (m, 2.66H), 6.11-6.05 (m, 0.33H), 6.04-5.98 (m, 1H), 3.77-3.65 (m, 1.33H), 3.50-3.34 (m, 1.33H).

**<sup>13</sup>C NMR (100 MHz, CDCl<sub>3</sub>):** δ 158.9, 157.5, 154.1, 152.1, 134.5, 130.1, 129.6, 129.4, 128.8, 128.7, 128.4, 128.0, 127.8, 127.1, 127.0, 126.7, 126.3, 126.2, 126.1, 126.0, 125.2, 124.0, 123.83, 123.82, 121.5, 120.7, 116.9, 111.1, 110.0, 104.5, 83.5, 82.8, 37.2, 36.7.

**HRMS (ESI)** calculated for C<sub>18</sub>H<sub>15</sub>O<sub>2</sub> ([M+H]<sup>+</sup>): 263.1067; found: 263.1063.

***tert*-butyl (2-(2-(2-hydroxyphenyl)-2,3-dihydrobenzofuran-5-yl)ethyl)carbamate (3t) & *tert*-butyl 3-(2,3-dihydrobenzofuran-2-yl)-4-hydroxyphenethylcarbamate (3t')**



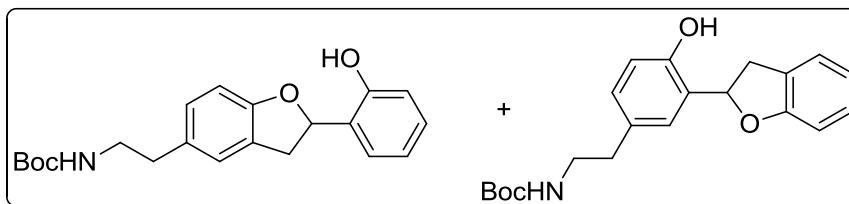

This compound was obtained in 72% yield (50.9 mg) as white solid. Eluent: PE/EA = 10/1,  $R_f$  = 0.4. An inseparable mixture of two regioisomers was obtained, and the ratio was determined to be 1/1 by  $^1\text{H-NMR}$  analysis.

$^1\text{H NMR}$  (400 MHz,  $\text{CDCl}_3$ ):  $\delta$  7.26 (d,  $J$  = 7.4 Hz, 0.5H), 7.19-7.13 (m, 1.5H), 7.09 (s, 0.5H), 7.00-6.93 (m, 1.5H), 6.91-6.86 (m, 2H), 6.82 (d,  $J$  = 3.0 Hz, 0.5H), 6.80 (d,  $J$  = 3.3 Hz, 0.5H), 6.00-5.89 (m, 1H), 4.65 (brs, 1H), 3.63-3.52 (m, 1H), 3.36-3.15 (m, 3H), 2.74-2.67 (m, 2H), 1.44 (s, 9H).

$^{13}\text{C NMR}$  (100 MHz,  $\text{CDCl}_3$ ):  $\delta$  159.1, 157.8, 156.4, 154.0, 152.6, 131.5, 130.4, 129.9, 129.2, 129.0, 128.5, 128.2, 127.5, 127.2, 127.1, 126.8, 126.5, 125.4, 125.1, 121.1, 120.2, 116.4, 116.2, 115.6, 109.7, 109.5, 82.2, 82.0, 79.7, 42.3, 42.1, 37.2, 35.8, 35.4, 28.5.

HRMS (ESI) calculated for  $\text{C}_{21}\text{H}_{25}\text{NNaO}_4$  ( $[\text{M}+\text{Na}]^+$ ): 378.1676; found: 378.1668.

**(3aR,3bS,10bR,12aR)-8-(2-hydroxyphenyl)-12a-methyl-2,3,3a,3b,4,5,7,8,10b,11,12,12a-dodecahydro-1H-cyclopenta[7,8]phenanthro[3,2-b]furan-1-one (3u)**

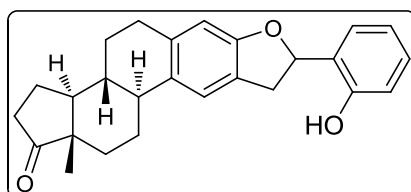

This compound was obtained in 36% yield (27.9 mg) as white solid. Eluent: PE/EA = 10/1,  $R_f$  = 0.45. An inseparable mixture of two diastereoisomers was obtained, and the  $dr$  = 1/1 was determined by  $^1\text{H-NMR}$  analysis.

$^1\text{H NMR}$  (400 MHz,  $\text{CDCl}_3$ ):  $\delta$  7.21 (d,  $J$  = 7.3 Hz, 1H), 7.16 (t,  $J$  = 7.8 Hz, 1H), 7.13 (s, 1H), 6.94-6.89 (m, 2H), 6.64 (s, 1H), 5.91-5.85 (m, 1H), 3.59-3.47 (m, 1H), 3.32 (dd,  $J$  = 15.4, 10.2 Hz, 1H), 2.91-2.80 (m, 2H), 2.50 (dd,  $J$  = 18.9, 8.5 Hz, 1H), 2.41-2.35 (m, 1H), 2.27-1.89 (m, 5H), 1.69-1.36 (m, 6H), 0.91 (s, 1.5H), 0.90 (s,

1.5H).

**<sup>13</sup>C NMR (100 MHz, CDCl<sub>3</sub>):** δ 221.4, 158.8, 152.24, 152.18, 137.99, 137.95, 131.9, 128.3, 127.22, 127.18, 125.1, 124.0, 121.4, 116.9, 110.0, 83.8, 83.7, 50.5, 48.2, 44.1, 38.4, 37.2, 36.0, 31.6, 29.3, 26.59, 26.57, 26.10, 26.06, 21.7, 14.0.

**HRMS (ESI)** calculated for C<sub>26</sub>H<sub>29</sub>O<sub>3</sub> ([M+H]<sup>+</sup>): 389.2111; found: 389.2106.

**(8*R*,9*S*,13*S*,14*S*)-2-((*R*)-2,3-dihydrobenzofuran-2-yl)-3-hydroxy-13-methyl-7,8,9,11,12,13,15,16-octahydro-6*H*-cyclopenta[*a*]phenanthren-17(14*H*)-one (3u')**

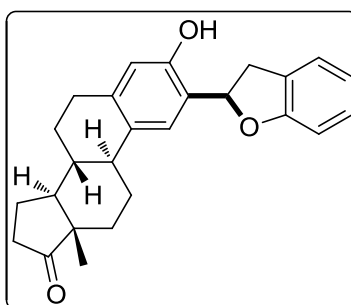

This compound was obtained in 26% yield (20.1 mg) as white solid. Eluent: PE/EA = 10/1, R<sub>f</sub> = 0.4. An inseparable mixture of two diastereoisomers was obtained, and the *dr* = 1/1 was determined by <sup>1</sup>H-NMR analysis.

**<sup>1</sup>H NMR (400 MHz, CDCl<sub>3</sub>):** δ 7.24-7.15 (m, 3H), 6.95-6.77 (m, 3H), 6.66 (s, 1H), 5.93-5.88 (m, 1H), 3.60-3.47 (m, 1H), 3.31-3.21 (m, 1H), 2.95-2.85 (m, 2H), 2.51 (dd, *J* = 18.9, 8.5 Hz, 1H), 2.42-2.36 (m, 1H), 2.28-2.23 (m, 1H), 2.20-1.94 (m, 4H), 1.67-1.40 (m, 6H), 0.92 (s, 1.5H), 0.91 (s, 1.5H).

**<sup>13</sup>C NMR (100 MHz, CDCl<sub>3</sub>):** δ 221.6, 157.0, 156.9, 154.28, 154.25, 136.8, 132.9, 129.3, 126.9, 126.3, 124.8, 124.7, 122.0, 121.9, 120.4, 116.8, 109.9, 83.6, 83.5, 50.5, 48.2, 44.4, 44.3, 38.51, 38.48, 37.23, 37.16, 36.0, 31.7, 30.0, 26.64, 26.63, 26.4, 26.2, 21.7, 14.0.

**HRMS (ESI)** calculated for C<sub>26</sub>H<sub>29</sub>O<sub>3</sub> ([M+H]<sup>+</sup>): 389.2111; found: 389.2106.

**Derivatization of compound 3a:**

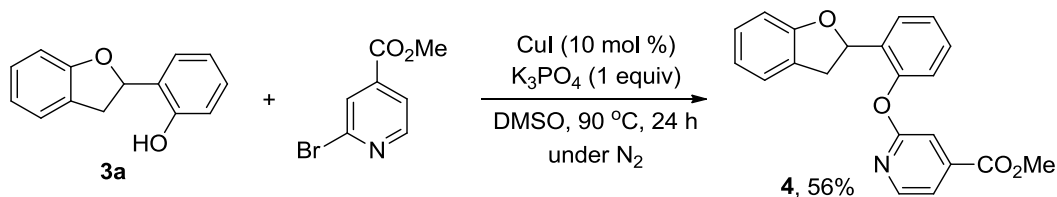

The mixture of dihydrobenzofuran **3a** (0.2 mmol), methyl 2-bromoisonicotinate (0.3 mmol), CuI (10 mol %) and K<sub>3</sub>PO<sub>4</sub> (1 equiv) in DMSO (2.0 mL) was stirred at 90 °C in an oil bath for 24 h under an atmosphere of N<sub>2</sub>. Afterwards, the solvent was removed under reduced pressure, and the resulted mixture was purified by preparative TLC (Eluent: PE/EA = 5/1, R<sub>f</sub> = 0.5) to afford the corresponding product **4** in 56% yield (38.8 mg) as yellow oil.

**<sup>1</sup>H NMR (400 MHz, CDCl<sub>3</sub>):** δ 8.29 (d, *J* = 5.2 Hz, 1H), 7.58 (d, *J* = 7.7 Hz, 1H), 7.53 (dd, *J* = 5.1, 0.8 Hz, 1H), 7.38 (s, 1H), 7.37-7.32 (m, 1H), 7.27-7.23 (m, 1H), 7.12-7.09 (m, 3H), 6.86-6.79 (m, 2H), 5.93-5.86 (m, 1H), 3.96 (s, 3H), 3.51 (dd, *J* = 15.7, 9.8 Hz, 1H), 3.15 (dd, *J* = 15.8, 7.8 Hz, 1H).

**<sup>13</sup>C NMR (100 MHz, CDCl<sub>3</sub>):** δ 165.2, 164.2, 159.6, 150.5, 148.6, 141.2, 134.9, 129.1, 128.2, 127.1, 126.6, 125.8, 125.0, 122.1, 120.8, 117.9, 111.3, 109.4, 79.6, 52.9, 37.8.

**HRMS (ESI)** calculated for C<sub>21</sub>H<sub>18</sub>NO<sub>4</sub> ([M+H]<sup>+</sup>): 348.1231; found: 348.1225.

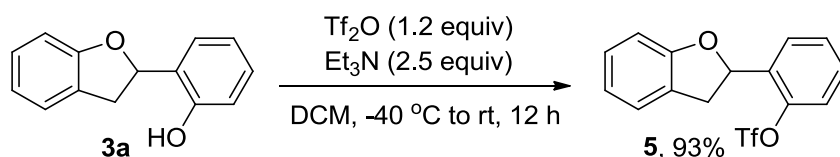

To the mixture of **3a** (1.0 mmol) in DCM (10.0 mL) was added Et<sub>3</sub>N (2.5 equiv), and the resulted mixture was cooled to -40 °C, then Tf<sub>2</sub>O (1.2 equiv) was added slowly. The resulted mixture was allowed to warm to room temperature and monitored by TLC. Afterwards, the solvent was removed under reduced pressure, and the resulted mixture was purified by preparative TLC (Eluent: PE/EA = 20/1, R<sub>f</sub> = 0.7) to give the desired product **5** in 93% yield (0.3201 g) as yellow liquid.

**<sup>1</sup>H NMR (400 MHz, CDCl<sub>3</sub>):** δ 7.66-7.60 (m, 1H), 7.41-7.35 (m, 2H), 7.35-7.30 (m, 1H), 7.20-7.16 (m, 2H), 6.92-6.89 (m, 2H), 6.08-5.97 (m, 1H), 3.77 (dd, *J* = 15.8, 9.7 Hz, 1H), 3.13 (dd, *J* = 15.8, 7.7 Hz, 1H).

**<sup>13</sup>C NMR (100 MHz, CDCl<sub>3</sub>):** δ 159.3, 146.1, 135.6, 129.7, 128.9, 128.5, 127.8, 125.8, 125.2, 121.3, 118.7 (q, *J* = 318.5 Hz), 109.6, 78.0, 38.2.

**<sup>19</sup>F NMR (376 MHz, CDCl<sub>3</sub>):** δ -73.61.

**HRMS (ESI)** calculated for C<sub>15</sub>H<sub>12</sub>F<sub>3</sub>O<sub>4</sub>S ([M+H]<sup>+</sup>): 345.0403; found: 345.0402.

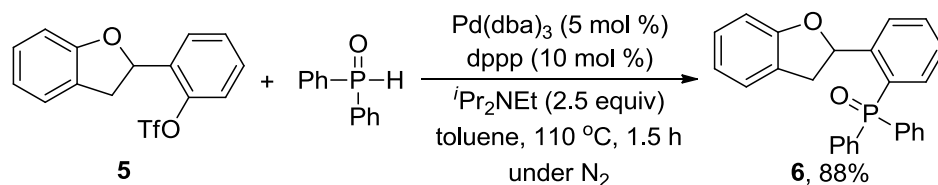

The mixture of **5** (0.2 mmol), diphenylphosphine oxide (0.3 mmol), Pd(dba)<sub>3</sub> (5 mol %), dppp (10 mol %) and *i*Pr<sub>2</sub>NEt (2.5 equiv) in toluene (1.0 mL) was stirred at 100 °C in an oil bath for 1.5 h under an atmosphere of N<sub>2</sub>. Afterwards, the reaction was cooled to room temperature, diluted with EA and transferred to a round bottom flask, the solvent was removed under reduced pressure, and the resulted mixture was purified by preparative TLC (Eluent: PE/EA = 3/1, R<sub>f</sub> = 0.3) to give the desired product **6** in 88% yield (70.0 mg) as yellow oil.

**<sup>1</sup>H NMR (400 MHz, CDCl<sub>3</sub>):** δ 7.74 (dd, *J* = 7.6, 3.8 Hz, 1H), 7.70-7.61 (m, 4H), 7.59-7.44 (m, 7H), 7.24 (t, *J* = 6.7 Hz, 1H), 7.14-7.02 (m, 3H), 6.86-6.76 (m, 2H), 6.44-6.39 (m, 1H), 3.65 (dd, *J* = 16.1, 9.6 Hz, 1H), 3.00 (dd, *J* = 16.1, 8.0 Hz, 1H).

**<sup>13</sup>C NMR (100 MHz, CDCl<sub>3</sub>):** δ 159.8, 148.1 (d, *J* = 7.1 Hz), 148.1, 133.4, 133.3, 133.14, 133.06, 132.88, 132.87, 132.4, 132.3, 132.23, 132.20, 132.17, 132.0, 131.9, 131.8, 129.5, 128.9, 128.8, 128.7, 128.5, 128.0, 127.3, 127.2, 127.1, 127.0, 126.6, 125.1, 120.8, 109.1, 81.7 (d, *J* = 5.4 Hz), 39.7.

**<sup>31</sup>P NMR (162 MHz, CDCl<sub>3</sub>):** δ 32.22.

**HRMS (ESI)** calculated for C<sub>26</sub>H<sub>22</sub>O<sub>2</sub>P ([M+H]<sup>+</sup>): 397.1352; found: 397.1348.

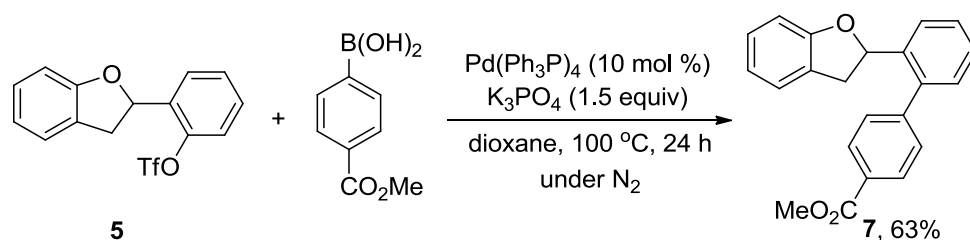

The mixture of **5** (0.2 mmol), arylboronic acid (0.3 mmol), Pd(Ph<sub>3</sub>P)<sub>4</sub> (5 mol %)

and  $K_3PO_4$  (1 equiv) in dioxane (1.0 mL) was stirred at 100 °C in an oil bath for 24 h under an atmosphere of  $N_2$ . Afterwards, the reaction was cooled to room temperature, diluted with EA and transferred to a round bottom flask, the solvent was removed under reduced pressure, and the resulted mixture was purified by preparative TLC (Eluent: PE/EA = 1/0,  $R_f$  = 0.3) to afford the desired product **7** in 63% yield (36.8 mg) as white solid.

**$^1H$  NMR (400 MHz,  $CDCl_3$ ):**  $\delta$  8.10 (d,  $J$  = 8.2 Hz, 2H), 7.63 (d,  $J$  = 7.4 Hz, 1H), 7.44 (d,  $J$  = 8.2 Hz, 2H), 7.41-7.33 (m, 2H), 7.27-7.24 (m, 1H), 7.15-7.07 (m, 2H), 6.88-6.79 (m, 2H), 5.77-5.71 (m, 1H), 3.94 (s, 3H), 3.34 (dd,  $J$  = 15.7, 9.5 Hz, 1H), 3.15 (dd,  $J$  = 15.6, 8.4 Hz, 1H).

**$^{13}C$  NMR (100 MHz,  $CDCl_3$ ):**  $\delta$  167.0, 159.6, 145.5, 139.7, 139.6, 129.73, 129.69, 129.5, 129.2, 128.7, 128.3, 127.9, 126.4, 126.0, 124.9, 120.8, 109.4, 107.2, 81.0, 52.3, 38.9.

**HRMS (ESI)** calculated for  $C_{22}H_{19}O_3$  ( $[M+H]^+$ ): 331.1329; found: 331.1323.

### **Asymmetric synthesis of **3a**:**

#### **Optimization studies:**

The mixture of *N*-phenoxy amide **1** (0.1 mmol, 1.0 equiv), 2-alkenylphenol **2a** (1.3 equiv), chiral Rh(III) catalyst (2.5 mol %) and additives in the MeOH (1.0 mL) was stirred for 12 h without exclusion of air or moisture. Afterwards, it was diluted with EtOAc and filtered through a short silica gel column to remove the metal residues. Then, the reaction mixture was concentrated and purified by preparative TLC to give the desired dihydrobenzofuran product **3a**. The ee was analyzed by HPLC using an IC-3 column.

**Table S2. Chiral  $Cp^X$ Rh(III) enabled enantioselective synthesis of dihydrobenzofuran **3a**:**

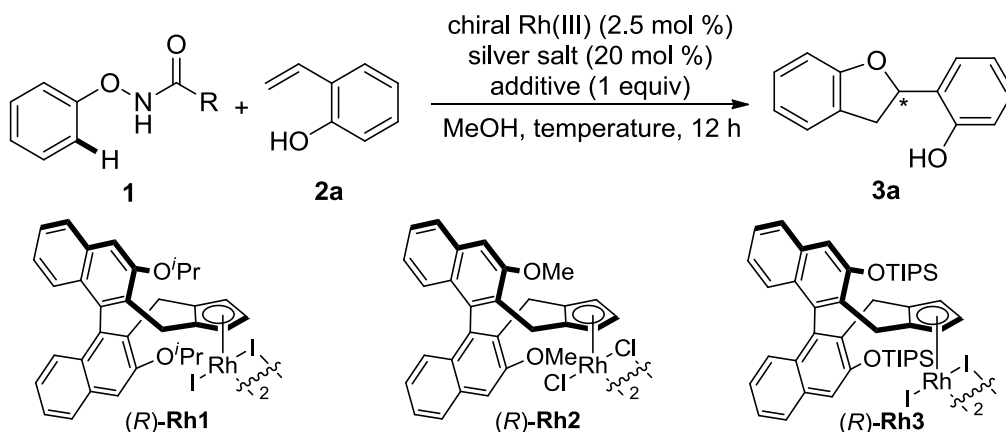

| Entry           | R               | Rh(III)        | Silver salt<br>(20 mol %) | Zinc salt<br>(1 equiv) | Additive<br>(10 mol %) | Yields (%) | e.r. <sup>b</sup> |
|-----------------|-----------------|----------------|---------------------------|------------------------|------------------------|------------|-------------------|
| 1               | Me              | <b>(R)-Rh1</b> | -                         | Zn(OAc) <sub>2</sub>   | -                      | n.d.       | -                 |
| 2               | Me              | <b>(R)-Rh1</b> | AgSbF <sub>6</sub>        | Zn(OAc) <sub>2</sub>   | -                      | 77         | 20:80             |
| 3               | Me              | <b>(R)-Rh2</b> | AgSbF <sub>6</sub>        | Zn(OAc) <sub>2</sub>   | -                      | 57         | 42:58             |
| 4               | Me              | <b>(R)-Rh3</b> | AgSbF <sub>6</sub>        | Zn(OAc) <sub>2</sub>   | -                      | 24         | 33:67             |
| 5               | Me              | <b>(R)-Rh1</b> | AgBF <sub>4</sub>         | Zn(OAc) <sub>2</sub>   | -                      | 66         | 20:80             |
| 6               | Me              | <b>(R)-Rh1</b> | AgOTf                     | Zn(OAc) <sub>2</sub>   | -                      | 14         | 18:82             |
| 7               | Me              | <b>(R)-Rh1</b> | AgOAc                     | Zn(OAc) <sub>2</sub>   | -                      | 10         | 18:82             |
| 8               | Me              | <b>(R)-Rh1</b> | AgNTf <sub>2</sub>        | Zn(OAc) <sub>2</sub>   | -                      | 49         | 17:83             |
| 9               | Me              | <b>(R)-Rh1</b> | AgF                       | Zn(OAc) <sub>2</sub>   | -                      | 46         | 16:84             |
| 10              | Me              | <b>(R)-Rh1</b> | AgSbF <sub>6</sub>        | Zn(OAc) <sub>2</sub>   | CuCl <sub>2</sub>      | 68         | 24:76             |
| 11              | Me              | <b>(R)-Rh1</b> | AgSbF <sub>6</sub>        | Zn(OAc) <sub>2</sub>   | ZnCl <sub>2</sub>      | 92         | 21:79             |
| 12              | Me              | <b>(R)-Rh1</b> | AgSbF <sub>6</sub>        | Zn(OAc) <sub>2</sub>   | KOPiv                  | 80         | 22:78             |
| 13              | Me              | <b>(R)-Rh1</b> | AgSbF <sub>6</sub>        | Zn(OPiv) <sub>2</sub>  | -                      | 93         | 18:82             |
| 14              | Et              | <b>(R)-Rh1</b> | AgSbF <sub>6</sub>        | Zn(OPiv) <sub>2</sub>  | -                      | 71         | 20:80             |
| 15              | <sup>i</sup> Pr | <b>(R)-Rh1</b> | AgSbF <sub>6</sub>        | Zn(OPiv) <sub>2</sub>  | -                      | 9          | 33:67             |
| 16              | Piv             | <b>(R)-Rh1</b> | AgSbF <sub>6</sub>        | Zn(OPiv) <sub>2</sub>  | -                      | n.d.       | -                 |
| 17              | cyclopentyl     | <b>(R)-Rh1</b> | AgSbF <sub>6</sub>        | Zn(OPiv) <sub>2</sub>  | -                      | 61         | 28:72             |
| 18              | cyclohexyl      | <b>(R)-Rh1</b> | AgSbF <sub>6</sub>        | Zn(OPiv) <sub>2</sub>  | -                      | 33         | 31:69             |
| 19              | Ts              | <b>(R)-Rh1</b> | AgSbF <sub>6</sub>        | Zn(OPiv) <sub>2</sub>  | -                      | n.d.       | -                 |
| 20 <sup>c</sup> | Me              | <b>(R)-Rh1</b> | AgSbF <sub>6</sub>        | Zn(OPiv) <sub>2</sub>  | -                      | 61         | 19:81             |
| 21 <sup>d</sup> | Me              | <b>(R)-Rh1</b> | AgSbF <sub>6</sub>        | Zn(OPiv) <sub>2</sub>  | -                      | 64         | 18:82             |

<sup>a</sup>Reaction Conditions: **1** (0.1 mmol), **2a** (0.13 mmol), chiral Rh(III) catalyst (2.5 mol %), silver salt (20 mol %), zinc salt (1 equiv) and additive in MeOH (0.1 M) at 0 °C for 12 h without exclusion of air or moisture, isolated yield were reported. <sup>b</sup>Determined by HPLC analysis with a

chiral stationary phase. <sup>c</sup>The reaction was conducted at -20 °C. <sup>d</sup>1 mol % of (*R*)-**Rh1** catalyst was used.

**General procedure for the enantioselective synthesis of dihydrobenzofuran derivative **3a**:** The mixture of *N*-phenoxyacetamide **1a** (0.1 mmol, 1.0 equiv), 2-alkenylphenol **2a** (1.3 equiv), (*R*)-**Rh1** (2.5 mol %), AgSbF<sub>6</sub> (20 mol %) and Zn(OPiv)<sub>2</sub> (1.0 equiv) in MeOH (1.0 mL) was stirred at 0 °C for 12 h without exclusion of air or moisture. Afterwards, the solvent was removed under reduced pressure, and the resulted mixture was purified by preparative TLC to afford the corresponding enantioenriched dihydrobenzofuran derivative **3a**.

**HPLC conditions:** Daicel Chiralpak IC-3 column (98:2 hexane: 2-propanol, 1.0 mL/min, 30 °C, 254 nm); tr (minor) = 13.53 min, tr (major) = 14.57 min, 18:82 er.

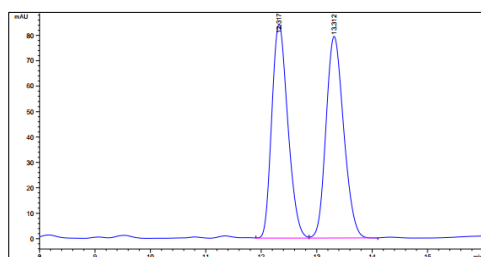

| No. | Time   | Area      | Area(%) |
|-----|--------|-----------|---------|
| 1   | 12.317 | 1690.9946 | 49.0824 |
| 2   | 13.312 | 1754.2058 | 50.9176 |

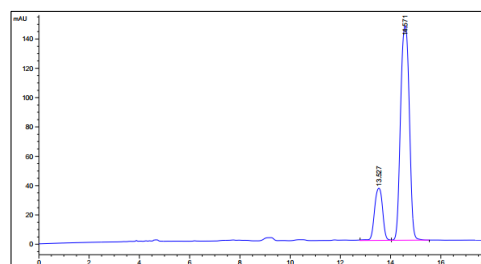

| No. | Time   | Area       | Area(%) |
|-----|--------|------------|---------|
| 1   | 13.527 | 795.86792  | 18.3716 |
| 2   | 14.571 | 3536.17920 | 81.6284 |

### III. Experimental Mechanistic Studies

#### Defining the role of -OH:

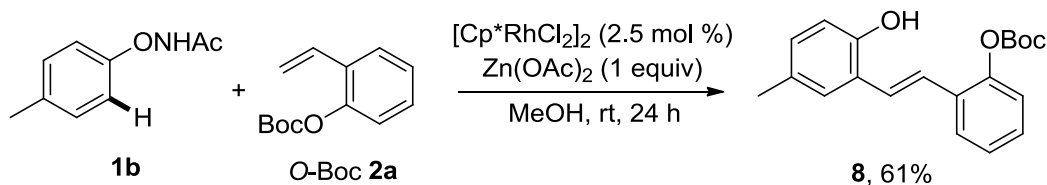

The mixture of *N*-aryloxyacetamide **1b** (0.1 mmol), *O*-Boc **2a** (1.3 equiv), [Cp\**RhCl*<sub>2</sub>]<sub>2</sub> (2.5 mol %) and Zn(OAc)<sub>2</sub> (1.0 equiv) in MeOH (1.0 mL) was stirred at room temperature for 24 h without exclusion of air or moisture. Afterwards, the solvent was removed under reduced pressure, and the resulted mixture was purified

by preparative TLC (Eluent: PE/EA = 10/1,  $R_f$  = 0.30) to afford the *ortho* C-H alkenylation product **8** in 61% (20.0 mg) isolated yield as white solid.

$^1\text{H NMR}$  (400 MHz,  $\text{CDCl}_3$ ):  $\delta$  7.68 (dd,  $J$  = 7.4, 2.0 Hz, 1H), 7.38-7.34 (m, 1H), 7.31 (d,  $J$  = 1.9 Hz, 1H), 7.29-7.21 (m, 2H), 7.19-7.12 (m, 2H), 6.93 (d,  $J$  = 8.9 Hz, 1H), 6.67 (dd,  $J$  = 8.1, 1.3 Hz, 1H), 5.28 (brs, 1H), 2.29 (s, 3H), 1.55 (s, 9H).

$^{13}\text{C NMR}$  (100 MHz,  $\text{CDCl}_3$ ):  $\delta$  152.1, 151.3, 148.5, 130.6, 130.1, 129.7, 128.4, 127.6, 126.8, 126.4, 125.7, 124.3, 122.8, 122.5, 116.0, 84.0, 27.8, 20.7.

HRMS (ESI) calculated for  $\text{C}_{20}\text{H}_{21}\text{O}_4$  ( $[\text{M}-\text{H}]^-$ ): 325.1445; found: 325.1445.

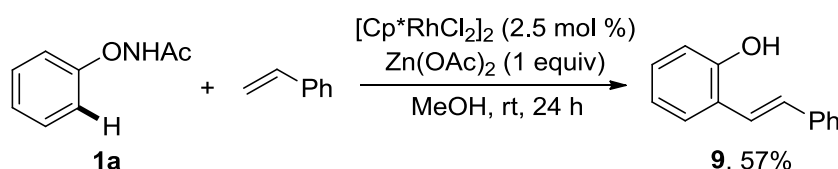

The mixture of *N*-phenoxyacetamide **1a** (0.1 mmol), styrene (1.3 equiv),  $[\text{Cp}^*\text{RhCl}_2]_2$  (2.5 mol %) and  $\text{Zn}(\text{OAc})_2$  (1.0 equiv) in MeOH (1.0 mL) was stirred at room temperature for 24 h without exclusion of air or moisture. Afterwards, the solvent was removed under reduced pressure, and the resulted mixture was purified by preparative TLC to afford the *ortho* C-H alkenylation product **9** in 57% (11.2 mg) isolated yield as white solid. **9** is a known compound and the characteristic data is in agreement with literature precedent.<sup>S4</sup>

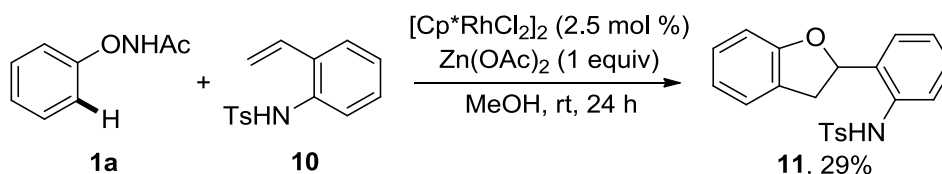

The mixture of *N*-phenoxyacetamide **1a** (0.2 mmol), 2-vinylaniline **10** (1.3 equiv),  $[\text{Cp}^*\text{RhCl}_2]_2$  (2.5 mol %) and  $\text{Zn}(\text{OAc})_2$  (1.0 equiv) in MeOH (2.0 mL) was stirred at room temperature for 24 h without exclusion of air or moisture. Afterwards, the solvent was removed under reduced pressure, and the resulted mixture was purified by preparative TLC (Eluent: PE/EA = 5/1,  $R_f$  = 0.5) to afford the C-H annulation product **11** in 29% (21.2 mg) isolated yield as white solid.



**$^1\text{H}$  NMR (400 MHz,  $\text{CDCl}_3$ ):**  $\delta$  7.68 (d,  $J = 8.1$  Hz, 1H), 7.56 (d,  $J = 8.2$  Hz, 2H), 7.29-7.21 (m, 1H), 7.18 (d,  $J = 8.1$  Hz, 2H), 7.14 (d,  $J = 7.5$  Hz, 2H), 7.09-7.06 (m, 2H), 6.87 (d,  $J = 8.4$  Hz, 1H), 6.81 (t,  $J = 7.5$  Hz, 1H), 5.56 (dd,  $J = 9.7, 2.7$  Hz, 1H), 3.12 (dd,  $J = 16.4, 9.7$  Hz, 1H), 2.91 (dd,  $J = 16.4, 2.6$  Hz, 1H), 2.37 (s, 3H).

**$^{13}\text{C}$  NMR (100 MHz,  $\text{CDCl}_3$ ):**  $\delta$  153.2, 144.4, 141.3, 134.6, 132.6, 129.8, 129.2, 128.6, 128.1, 127.3, 126.9, 125.3, 125.0, 121.1, 117.7, 117.2, 60.3, 36.3, 21.7.

**HRMS (ESI)** calculated for  $\text{C}_{21}\text{H}_{20}\text{NSO}_3$  ( $[\text{M}+\text{H}]^+$ ): 366.1159; found: 366.1150.

#### Deuterium-labeling experiments:

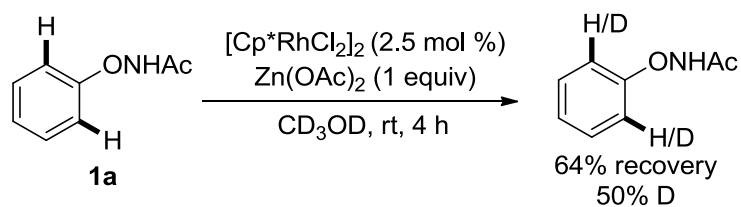

*N*-phenoxyacetamide **1a** (0.1 mmol) was dissolved in  $\text{CD}_3\text{OD}$  (1.0 mL) in the presence of  $[\text{Cp}^*\text{RhCl}_2]_2$  (2.5 mol %) and  $\text{Zn}(\text{OAc})_2$  (0.1 mmol). The reaction was conducted under the standard condition for 4 h, afterwards, **1a** was recovered by flash column chromatography on silica gel (Eluent: PE/EA = 2/1) and was analyzed by  $^1\text{H}$ -NMR spectroscopy. 50% deuteration was detected by  $^1\text{H}$ -NMR analysis.

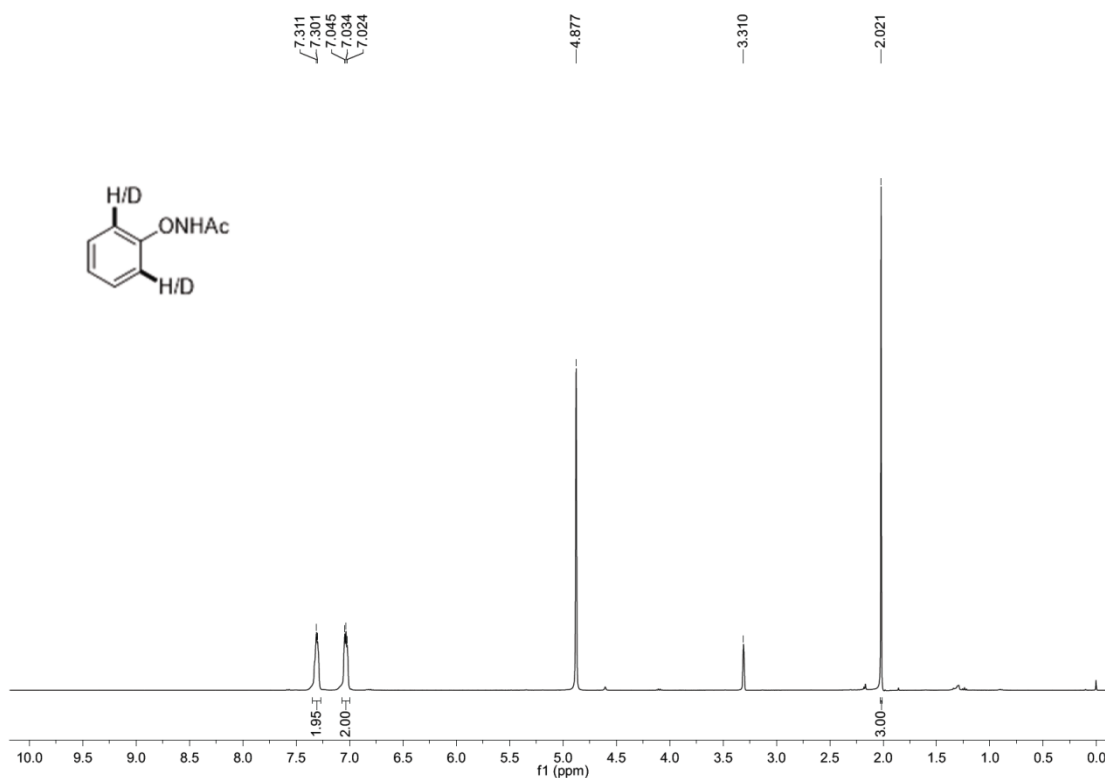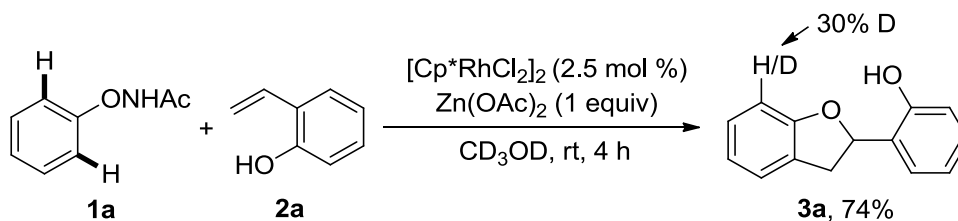

The mixture of *N*-phenoxyacetamide **1a** (0.1 mmol), **2a** (1.3 equiv), [Cp\**RhCl*<sub>2</sub>]<sub>2</sub> (2.5 mol %) and Zn(OAc)<sub>2</sub> (1 equiv) in MeOH (1.0 mL) was stirred at room temperature for 4 h without exclusion of air or moisture. Afterwards, the solvent was removed under reduce pressure, and **3a** was purified by preparative TLC in 74% yield (15.7 mg). <sup>1</sup>H-NMR analysis showed that 30% deuterium incorporation at the *ortho*-position of the -ONHAc ODG (see the multiplet at δ 6.87-6.81 ppm).

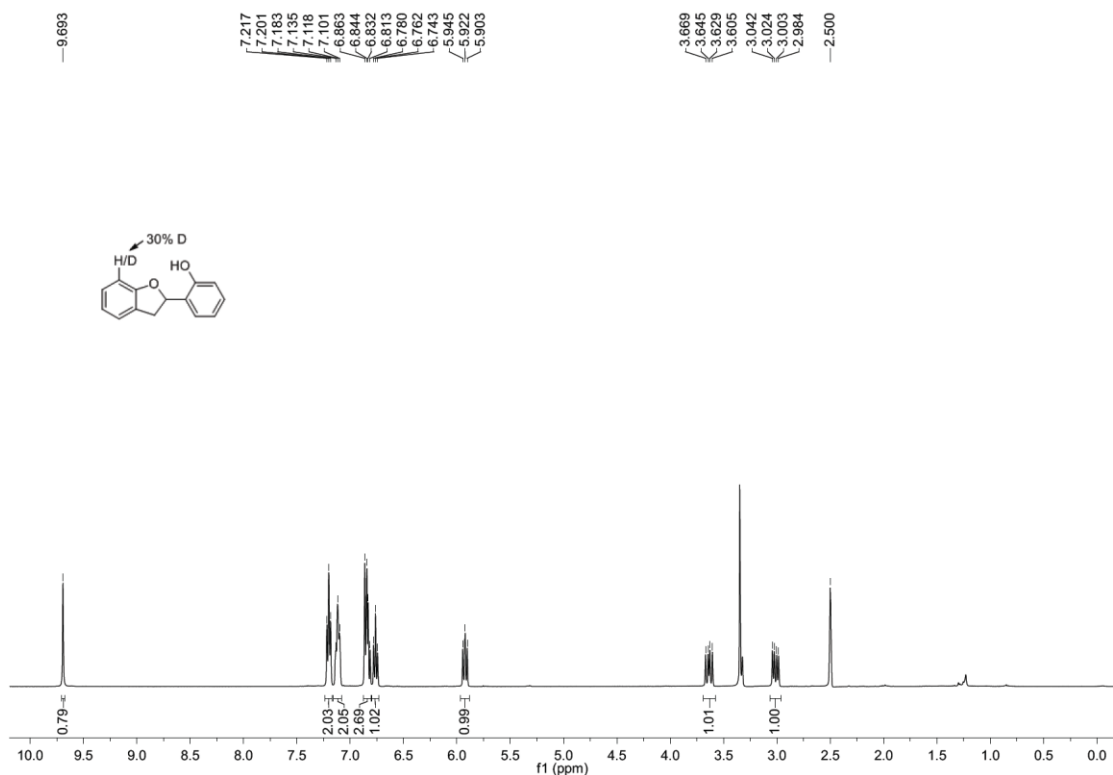

### Defining the five-membered rhodacycle as the active intermediate:

The rhodacycle complex **A** is a known compound and synthesized according to a known procedure.<sup>S5</sup>

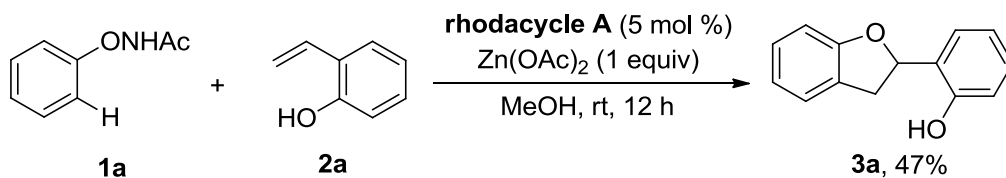

The mixture of *N*-phenoxyacetamide **1a** (0.1 mmol), 2-alkenylphenol **2a** (1.3 equiv), rhodacycle **A** (5 mol %) and Zn(OAc)<sub>2</sub> (1.0 equiv) in MeOH (1.0 mL) was stirred at room temperature for 12 h without exclusion of air or moisture. Afterwards, the solvent was removed under reduced pressure, and the resulted mixture was purified by preparative TLC to afford the corresponding products **3a** in 47% yield.

## IV. X-Ray Crystallographic Data

*Experimental:* The sample was dissolved in appropriate amount of EtOAc followed by the addition of PE to furnish a saturated solution. Afterwards, the mixture was allowed to stand at -20 °C to form the crystals. A suitable crystal was selected and

measured on a SuperNova, Dual, Cu at zero, AtlasS2 diffractometer. The crystal was kept at 150.00(10) K during data collection.

*Crystal structure determination:* Crystal Data for C<sub>15</sub>H<sub>11</sub>F<sub>3</sub>O<sub>2</sub> (*M* = 280.24 g/mol): monoclinic, space group Pc (no. 7), *a* = 5.6437(5) Å, *b* = 9.0829(10) Å, *c* = 25.058(2) Å, β = 92.384(9)°, *V* = 1283.4(2) Å<sup>3</sup>, *Z* = 4, *T* = 150.00(10) K, μ(Cu Kα) = 1.078 mm<sup>-1</sup>, *D*<sub>calc</sub> = 1.450 g/cm<sup>3</sup>, 4025 reflections measured (7.062° ≤ 2θ ≤ 133.134°), 3116 unique (*R*<sub>int</sub> = 0.0331, *R*<sub>sigma</sub> = 0.0483) which were used in all calculations. The final *R*<sub>1</sub> was 0.1165 (*I* > 2σ(*I*)) and *wR*<sub>2</sub> was 0.3677 (all data). The crystallographic data have already been deposited at the Cambridge Crystallographic Data Centre (CCDC numbers: 2117606), which can be acquired from [www.ccdc.cam.ac.uk/data\\_request/cif](http://www.ccdc.cam.ac.uk/data_request/cif).

The ellipsoid contour percent probability level is 50% for the image of the structure.

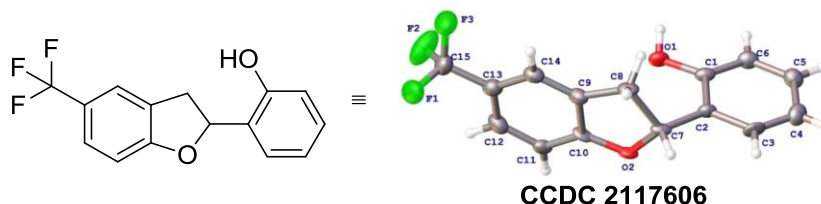

**Table S3.** Crystal data and structure refinement for **3p**

|                       |                                                               |
|-----------------------|---------------------------------------------------------------|
| Identification code   | cf3                                                           |
| Empirical formula     | C <sub>15</sub> H <sub>11</sub> F <sub>3</sub> O <sub>2</sub> |
| Formula weight        | 280.24                                                        |
| Temperature/K         | 150.00(10)                                                    |
| Crystal system        | monoclinic                                                    |
| Space group           | Pc                                                            |
| <i>a</i> /Å           | 5.6437(5)                                                     |
| <i>b</i> /Å           | 9.0829(10)                                                    |
| <i>c</i> /Å           | 25.058(2)                                                     |
| α/°                   | 90                                                            |
| β/°                   | 92.384(9)                                                     |
| γ/°                   | 90                                                            |
| Volume/Å <sup>3</sup> | 1283.4(2)                                                     |
| <i>Z</i>              | 4                                                             |

|                                                |                                                               |
|------------------------------------------------|---------------------------------------------------------------|
| $\rho_{\text{calc}}/\text{cm}^3$               | 1.450                                                         |
| $\mu/\text{mm}^{-1}$                           | 1.078                                                         |
| F(000)                                         | 576.0                                                         |
| Crystal size/ $\text{mm}^3$                    | $0.13 \times 0.11 \times 0.09$                                |
| Radiation                                      | Cu K $\alpha$ ( $\lambda = 1.54184$ )                         |
| 2 $\Theta$ range for data collection/ $^\circ$ | 7.062 to 133.134                                              |
| Index ranges                                   | $-6 \leq h \leq 6, -6 \leq k \leq 10, -29 \leq l \leq 29$     |
| Reflections collected                          | 4025                                                          |
| Independent reflections                        | 3116 [ $R_{\text{int}} = 0.0331, R_{\text{sigma}} = 0.0483$ ] |
| Data/restraints/parameters                     | 3116/242/420                                                  |
| Goodness-of-fit on $F^2$                       | 1.636                                                         |
| Final R indexes [ $I \geq 2\sigma(I)$ ]        | $R_1 = 0.1165, wR_2 = 0.3613$                                 |
| Final R indexes [all data]                     | $R_1 = 0.1212, wR_2 = 0.3677$                                 |
| Largest diff. peak/hole / $e \text{ \AA}^{-3}$ | 0.54/-0.53                                                    |
| Flack parameter                                | -0.2(4)                                                       |

## V. DFT Calculations

### Computational details:

Density functional theory (DFT) calculations were performed by using Gaussian 09 quantum chemical package.<sup>S6</sup> Unless otherwise specified, the geometries of all reported reactants, intermediates, transition states and products were optimized using the B3LYP functional<sup>S7</sup> with the standard 6-31G(d) basis set (Lanl2dz<sup>S8</sup> basis set for Rh) (denoted as B3LYP/BS1). Frequency analysis was conducted at the same level of theory to verify the stationary points to be real minima or saddle points and to obtain the thermodynamic energy corrections. Intrinsic reaction coordinate (IRC) calculations<sup>S9</sup> were carried out to confirm that all transition state structures connect the corresponding reactants and products. Solvent effects in methanol were estimated by using the SMD<sup>S10</sup> solvation method at the B3LYP level of theory with the DFT-D3(BJ) dispersion corrections.<sup>S11</sup> Herein, SDD<sup>S12</sup> was used for Rh and the 6-311++G(d,p) basis set was used for all other atoms. This combination is named B3D3 SMD/BS2. If not noted, the energies presented in this paper are the B3D3-calculated single point energies with B3LYP-calculated thermodynamic

corrections which were calculated under standard conditions (1 atm and 298.15 K) (denoted as  $\Delta G_{\text{sol}}$  (B3D3 SMD/BS2//B3LYP/BS1) or  $\Delta G$  for clarity). Computed structures are illustrated using CYLVIEW.<sup>S13</sup>

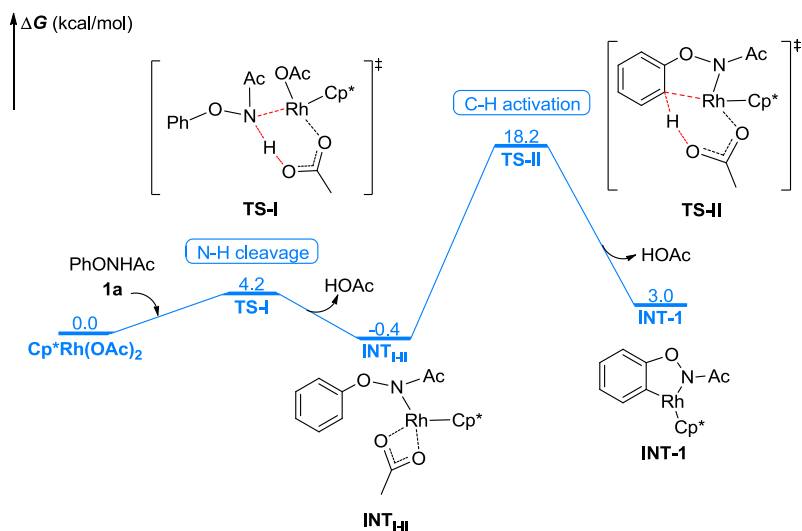

**Figure S1.** Computed Gibbs free energy changes of N-H/C-H bond cleavage.

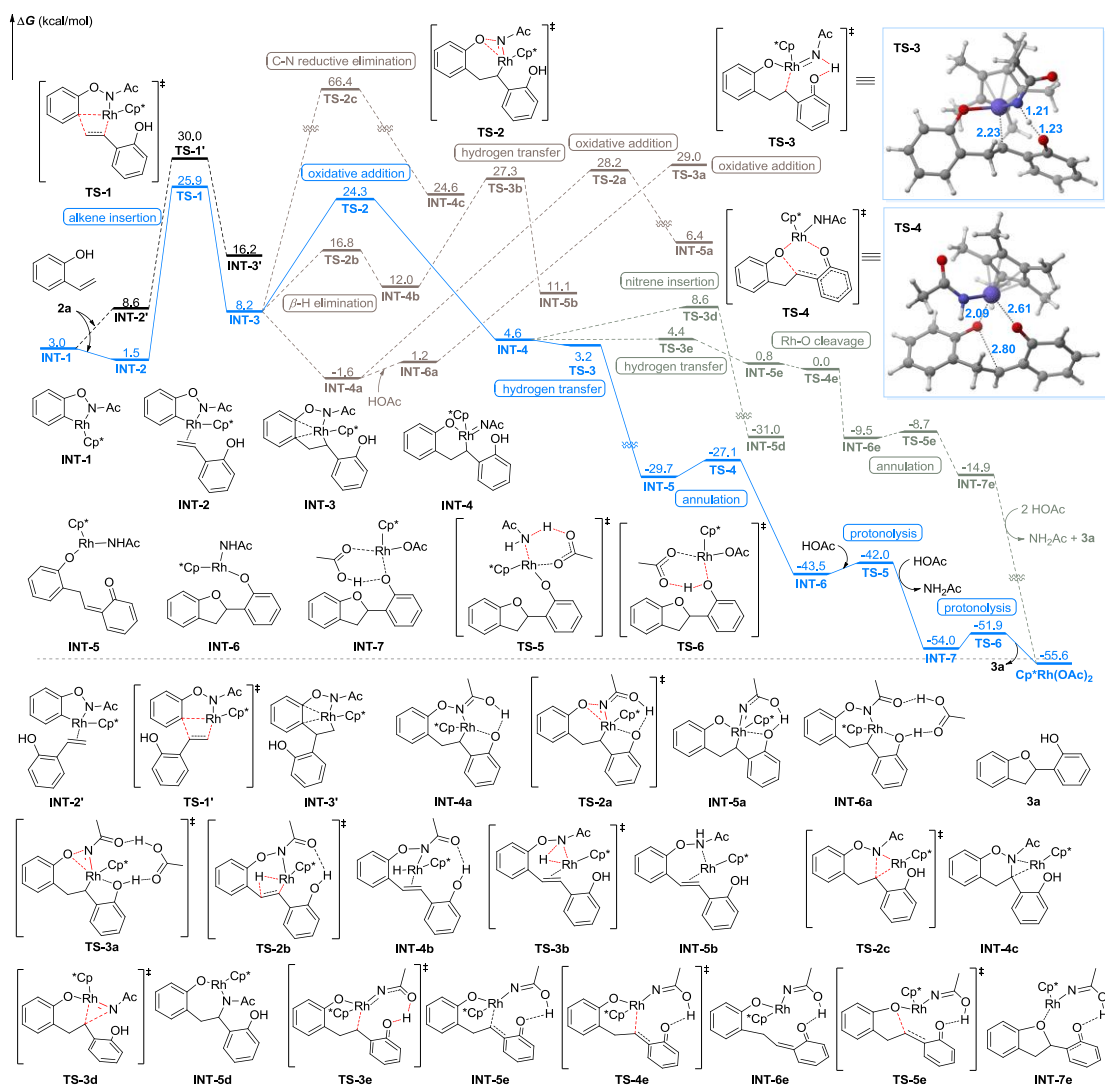

**Figure S2.** Computed Gibbs free energy changes of the reaction pathways from INT-1.

**Various energy values for the reported species and imaginary frequencies for the transition states**

**Table S4.** Energy, enthalpy and free energy corrections of the structures calculated at B3LYP/BS1, single point energies at the B3D3 SMD/BS2//B3LYP/BS1 level (in Hartree) and imaginary frequencies of the transition states.

| Structures              | corr. to ZPE | corr. to $E$ | corr. to $H$ | corr. to $G$ | SP <sub>SMD</sub> | Imaginary frequency |
|-------------------------|--------------|--------------|--------------|--------------|-------------------|---------------------|
| Cp*Rh(OAc) <sub>2</sub> | 0.327264     | 0.351500     | 0.352444     | 0.272969     | -958.087430       | —                   |
| <b>1a</b>               | 0.159145     | 0.169346     | 0.170290     | 0.121710     | -515.620930       | —                   |

|                           |          |          |          |          |              |          |
|---------------------------|----------|----------|----------|----------|--------------|----------|
| <b>2a</b>                 | 0.137981 | 0.145871 | 0.146815 | 0.105342 | -385.021147  | —        |
| <b>3a</b>                 | 0.226737 | 0.238719 | 0.239663 | 0.187851 | -691.423730  | —        |
| <b>HOAc</b>               | 0.062073 | 0.066618 | 0.067562 | 0.034930 | -229.182762  | —        |
| <b>NH<sub>2</sub>Ac</b>   | 0.073793 | 0.079015 | 0.079960 | 0.045935 | -209.313613  | —        |
| <b>TS-I</b>               | 0.482650 | 0.518171 | 0.519116 | 0.412537 | -1473.719454 | -815.13  |
| <b>INT<sub>I-II</sub></b> | 0.423746 | 0.453682 | 0.454626 | 0.361568 | -1244.528056 | —        |
| <b>TS-II</b>              | 0.418779 | 0.447852 | 0.448796 | 0.359906 | -1244.496748 | -932.47  |
| <b>INT-1</b>              | 0.360731 | 0.384546 | 0.385491 | 0.308455 | -1015.321623 | —        |
| <b>INT-2</b>              | 0.501062 | 0.533344 | 0.534289 | 0.438748 | -1400.370196 | —        |
| <b>TS-1</b>               | 0.500706 | 0.532112 | 0.533056 | 0.440471 | -1400.332991 | -337.85  |
| <b>INT-3</b>              | 0.502393 | 0.534241 | 0.535185 | 0.440777 | -1400.361572 | —        |
| <b>TS-2</b>               | 0.499655 | 0.531597 | 0.532541 | 0.437491 | -1400.332640 | -198.13  |
| <b>INT-4</b>              | 0.500786 | 0.533033 | 0.533977 | 0.438248 | -1400.364783 | —        |
| <b>TS-3</b>               | 0.495570 | 0.527402 | 0.528346 | 0.434138 | -1400.362859 | -1069.94 |
| <b>INT-5</b>              | 0.500667 | 0.534184 | 0.535128 | 0.432538 | -1400.413740 | —        |
| <b>TS-4</b>               | 0.500526 | 0.533129 | 0.534074 | 0.435970 | -1400.413001 | -35.38   |
| <b>INT-6</b>              | 0.504297 | 0.536282 | 0.537226 | 0.440341 | -1400.443495 | —        |
| <b>TS-5</b>               | 0.563914 | 0.601101 | 0.602045 | 0.493620 | -1629.642211 | -594.56  |
| <b>INT-7</b>              | 0.554908 | 0.592655 | 0.593599 | 0.483722 | -1649.531560 | —        |
| <b>TS-6</b>               | 0.553624 | 0.591368 | 0.592312 | 0.480005 | -1649.524536 | -29.77   |
| <b>INT-2'</b>             | 0.501192 | 0.533824 | 0.534768 | 0.438845 | -1400.358944 | —        |
| <b>TS-1'</b>              | 0.500683 | 0.532449 | 0.533393 | 0.439730 | -1400.325798 | -346.64  |
| <b>INT-3'</b>             | 0.502622 | 0.534512 | 0.535456 | 0.440789 | -1400.348733 | —        |
| <b>INT-4a</b>             | 0.503002 | 0.533994 | 0.534938 | 0.442843 | -1400.379196 | —        |
| <b>TS-2a</b>              | 0.499514 | 0.531284 | 0.532228 | 0.437449 | -1400.326388 | -100.85  |
| <b>INT-5a</b>             | 0.501036 | 0.532920 | 0.533864 | 0.439431 | -1400.363028 | —        |
| <b>INT-6a</b>             | 0.566089 | 0.603729 | 0.604673 | 0.494578 | -1629.574277 | —        |
| <b>TS-3a</b>              | 0.561684 | 0.599392 | 0.600336 | 0.490909 | -1629.526313 | -32.92   |
| <b>TS-2b</b>              | 0.498357 | 0.529520 | 0.530465 | 0.438458 | -1400.345506 | -726.65  |



|               |          |          |          |          |              |          |
|---------------|----------|----------|----------|----------|--------------|----------|
| <b>INT-4b</b> | 0.499979 | 0.531390 | 0.532334 | 0.439874 | -1400.354648 | —        |
| <b>TS-3b</b>  | 0.497457 | 0.529174 | 0.530118 | 0.435668 | -1400.325991 | -1093.17 |
| <b>INT-5b</b> | 0.503627 | 0.535219 | 0.536163 | 0.443074 | -1400.359180 | —        |
| <b>TS-2c</b>  | 0.500603 | 0.532290 | 0.533234 | 0.438359 | -1400.266401 | -329.80  |
| <b>INT-4c</b> | 0.504273 | 0.535383 | 0.536327 | 0.442916 | -1400.337491 | —        |
| <b>TS-3d</b>  | 0.500363 | 0.532193 | 0.533138 | 0.438896 | -1400.359074 | -132.91  |
| <b>INT-5d</b> | 0.503993 | 0.535580 | 0.536525 | 0.442215 | -1400.425450 | —        |
| <b>TS-3e</b>  | 0.496906 | 0.528671 | 0.529615 | 0.435757 | -1400.362501 | -687.92  |
| <b>INT-5e</b> | 0.501361 | 0.533796 | 0.534740 | 0.439550 | -1400.372135 | —        |
| <b>TS-4e</b>  | 0.500685 | 0.532691 | 0.533635 | 0.439021 | -1400.372880 | -58.97   |
| <b>INT-6e</b> | 0.500606 | 0.533835 | 0.534779 | 0.435375 | -1400.384341 | —        |
| <b>TS-5e</b>  | 0.500948 | 0.532917 | 0.533861 | 0.438611 | -1400.386361 | -197.29  |
| <b>INT-7e</b> | 0.501213 | 0.533486 | 0.534430 | 0.437848 | -1400.395391 | —        |
| <b>TS-3d</b>  | 0.500363 | 0.532193 | 0.533138 | 0.438896 | -1400.359074 | -132.91  |
| <b>INT-5d</b> | 0.503993 | 0.535580 | 0.536525 | 0.442215 | -1400.425450 | —        |

---

**Cartesian coordinates of the optimized structures:**

**Cp\*Rh(OAc)<sub>2</sub>**

|    |             |             |             |
|----|-------------|-------------|-------------|
| Rh | 0.01372600  | 0.21666800  | -0.09621600 |
| C  | 1.23328100  | -1.17366900 | 1.07994900  |
| C  | 1.11966400  | -1.70457500 | -0.25047500 |
| C  | 1.65512800  | -0.73313700 | -1.16495800 |
| C  | 2.19585200  | 0.37308200  | -0.37896300 |
| C  | 1.93494300  | 0.10322300  | 0.99348200  |
| C  | -1.24029000 | 2.42134500  | 0.08235600  |
| O  | -0.64724900 | 2.10927300  | -0.99912500 |
| O  | -1.09123200 | 1.67632500  | 1.10439300  |
| C  | -2.13899200 | 3.62948600  | 0.14275800  |
| H  | -3.15448400 | 3.32531500  | -0.13689600 |
| H  | -2.16956700 | 4.03403000  | 1.15733600  |
| H  | -1.80333500 | 4.39180400  | -0.56453000 |
| O  | -1.87683200 | -0.38196200 | -0.67763700 |
| C  | -2.51624400 | -1.31118000 | -0.02238100 |
| O  | -2.07184700 | -2.00067800 | 0.89858800  |

|   |             |             |             |
|---|-------------|-------------|-------------|
| C | -3.95687700 | -1.47672000 | -0.50383800 |
| H | -4.55949500 | -0.64217000 | -0.12663200 |
| H | -4.00934700 | -1.45107200 | -1.59632400 |
| H | -4.37245200 | -2.41297700 | -0.12494700 |
| C | 2.87932100  | 1.57564400  | -0.95588500 |
| H | 3.90605600  | 1.32666200  | -1.25549700 |
| H | 2.35051800  | 1.94324000  | -1.84021100 |
| H | 2.92784900  | 2.39543000  | -0.23520900 |
| C | 2.28590700  | 0.96147800  | 2.17108600  |
| H | 3.11792300  | 0.51693400  | 2.73268100  |
| H | 2.58620600  | 1.96640700  | 1.86476600  |
| H | 1.43522800  | 1.05943300  | 2.85205900  |
| C | 1.76711700  | -0.87040700 | -2.65302100 |
| H | 1.68033000  | 0.10046500  | -3.14934700 |
| H | 2.73907200  | -1.30215400 | -2.92965700 |
| H | 0.98504600  | -1.52009400 | -3.05381200 |
| C | 0.54299200  | -3.03967500 | -0.60657800 |
| H | 0.23245900  | -3.07554600 | -1.65403000 |
| H | 1.30135700  | -3.82016700 | -0.45458900 |
| H | -0.32609200 | -3.26105400 | 0.01565300  |
| C | 0.80633300  | -1.86502300 | 2.33767800  |
| H | -0.19957900 | -2.27310200 | 2.21230300  |
| H | 1.50043500  | -2.68099300 | 2.58253000  |
| H | 0.79145800  | -1.17312100 | 3.18409000  |

**1a**

|   |             |             |             |
|---|-------------|-------------|-------------|
| C | -2.23365700 | 1.49434800  | 0.06491700  |
| C | -0.94789300 | 1.02004200  | -0.21048500 |
| C | -0.73980300 | -0.35567600 | -0.28105400 |
| C | -1.79055600 | -1.25472600 | -0.08000300 |
| C | -3.06522500 | -0.76452600 | 0.19317800  |
| C | -3.29521500 | 0.61263300  | 0.26668800  |
| H | -2.39835900 | 2.56712900  | 0.12268800  |
| H | -0.12194000 | 1.70363200  | -0.36406000 |
| H | -1.59118700 | -2.32022000 | -0.13643900 |
| H | -3.88155400 | -1.46417000 | 0.35134700  |
| H | -4.29008600 | 0.99169000  | 0.48149500  |
| O | 0.48132400  | -0.95642600 | -0.56075800 |
| N | 1.53907300  | -0.05959900 | -0.74606100 |
| H | 1.88368900  | -0.14985500 | -1.69716100 |
| C | 2.48695100  | -0.02984900 | 0.28078300  |
| O | 2.25532600  | -0.41386100 | 1.40643000  |
| C | 3.80331900  | 0.59892800  | -0.15163700 |
| H | 3.75147800  | 1.09823700  | -1.12454000 |

|           |             |             |             |
|-----------|-------------|-------------|-------------|
| H         | 4.10797700  | 1.32443700  | 0.60674500  |
| H         | 4.57239300  | -0.18048400 | -0.19409500 |
| <b>2a</b> |             |             |             |
| C         | -2.65893300 | 0.85326200  | 0.07609300  |
| C         | -1.25426300 | 0.85560000  | 0.04716600  |
| C         | -0.61080100 | 2.11208900  | -0.00843500 |
| C         | -1.34909500 | 3.29879600  | -0.04368700 |
| C         | -2.74187700 | 3.26012200  | -0.02271500 |
| C         | -3.40163800 | 2.03049600  | 0.03814800  |
| H         | -3.17666200 | -0.09892100 | 0.14575700  |
| H         | -0.82689900 | 4.25334100  | -0.09032100 |
| H         | -3.30598500 | 4.18830200  | -0.04885800 |
| H         | -4.48658300 | 1.99019700  | 0.06480400  |
| C         | -0.44670900 | -0.37388300 | 0.08607000  |
| C         | -0.88616200 | -1.62617000 | -0.09873500 |
| H         | 0.61207600  | -0.22019100 | 0.27641300  |
| H         | -0.20433600 | -2.46896900 | -0.03657700 |
| H         | -1.92263900 | -1.86325900 | -0.32475800 |
| O         | 0.75924800  | 2.12195500  | -0.03296500 |
| H         | 1.06427700  | 3.04214000  | -0.04860600 |
| <b>3a</b> |             |             |             |
| C         | -0.70143100 | 12.63329600 | -2.87737200 |
| C         | -0.40651900 | 11.31985800 | -3.22352500 |
| C         | 0.77188600  | 11.04095200 | -3.91891900 |
| C         | 1.68057300  | 12.02341100 | -4.28618600 |
| C         | 1.37016300  | 13.34296400 | -3.93251300 |
| C         | 0.19476500  | 13.64852700 | -3.24060800 |
| H         | -1.61145600 | 12.87243900 | -2.33304200 |
| H         | 2.58548400  | 11.77337800 | -4.83036000 |
| H         | 2.05490800  | 14.14013700 | -4.20857200 |
| H         | -0.02683900 | 14.68009600 | -2.98288800 |
| O         | 0.93183700  | 9.69340900  | -4.17954400 |
| C         | -0.38478900 | 9.06631800  | -3.96002700 |
| H         | -0.90578000 | 9.12040400  | -4.92431400 |
| C         | -0.24184800 | 7.62571100  | -3.54530400 |
| C         | 0.73457500  | 7.20803700  | -2.61710500 |
| C         | -1.15771200 | 6.68163500  | -4.02549600 |
| C         | 0.75428100  | 5.88158300  | -2.17078500 |
| C         | -1.14323400 | 5.36072900  | -3.58077900 |
| H         | -1.90039500 | 6.99725400  | -4.75567800 |
| C         | -0.18417700 | 4.96786300  | -2.64335300 |
| H         | 1.52092300  | 5.59180700  | -1.45887700 |

|   |             |             |             |
|---|-------------|-------------|-------------|
| H | -1.86684100 | 4.64739200  | -3.96369400 |
| H | -0.15648200 | 3.94088900  | -2.28877600 |
| O | 1.67635400  | 8.05804400  | -2.11994900 |
| C | -1.09983000 | 10.00545100 | -2.95030800 |
| H | -0.92789500 | 9.66968800  | -1.91895600 |
| H | -2.18053000 | 10.01749400 | -3.12155100 |
| H | 1.73029400  | 8.82094100  | -2.72924300 |

**HOAc**

|   |             |             |             |
|---|-------------|-------------|-------------|
| C | -3.21269700 | 0.01353000  | -0.04836400 |
| O | -2.01617200 | 0.00790700  | -0.22983200 |
| O | -3.91600300 | 1.16019500  | 0.14023200  |
| H | -3.26340000 | 1.88432800  | 0.09308200  |
| C | -4.11158700 | -1.19696400 | 0.00089600  |
| H | -4.62031900 | -1.24704100 | 0.96931800  |
| H | -4.88545300 | -1.12106700 | -0.77017800 |
| H | -3.51768600 | -2.09782000 | -0.15487700 |

**NH<sub>2</sub>Ac**

|   |            |             |             |
|---|------------|-------------|-------------|
| N | 2.51304600 | 9.69551600  | 0.08311100  |
| C | 3.16830400 | 10.24655700 | 1.15367800  |
| O | 4.37457900 | 10.13502500 | 1.30722300  |
| H | 1.54267100 | 9.88675000  | -0.11289800 |
| C | 2.28552600 | 11.00630400 | 2.13572200  |
| H | 2.46439700 | 12.08093600 | 2.01790400  |
| H | 1.21596300 | 10.81284700 | 2.00571700  |
| H | 2.57978800 | 10.73424800 | 3.15242400  |
| H | 3.07341100 | 9.27157200  | -0.64330400 |

**TS-I**

|   |            |             |             |
|---|------------|-------------|-------------|
| C | 3.05835200 | 0.55201900  | -0.48617500 |
| C | 2.35213200 | 0.44276300  | -1.73389700 |
| C | 1.82184800 | -0.89072400 | -1.83431500 |
| C | 2.31037400 | -1.64829000 | -0.68696500 |
| C | 3.04668600 | -0.76283400 | 0.14563200  |
| C | 2.12081700 | -3.11727200 | -0.46041400 |
| H | 1.89833700 | -3.34118300 | 0.58576500  |
| H | 1.30511900 | -3.51457200 | -1.07045100 |
| H | 3.03455500 | -3.65744000 | -0.74229300 |
| C | 3.69213800 | -1.09288700 | 1.45625000  |
| H | 3.33327200 | -2.04833200 | 1.84617700  |
| H | 4.78297000 | -1.15233400 | 1.34626500  |
| H | 3.46649600 | -0.32258500 | 2.19993200  |
| C | 3.77750900 | 1.76619200  | 0.01501400  |

|    |             |             |             |
|----|-------------|-------------|-------------|
| H  | 4.01311700  | 1.67042700  | 1.07801900  |
| H  | 4.72219000  | 1.90557400  | -0.52899900 |
| H  | 3.15160900  | 2.65233800  | -0.11601200 |
| C  | 2.20258900  | 1.53727700  | -2.74386500 |
| H  | 2.07610900  | 2.50254300  | -2.25065400 |
| H  | 3.09994100  | 1.57403600  | -3.37746900 |
| H  | 1.34098800  | 1.36888800  | -3.39486400 |
| C  | 1.05352000  | -1.45576400 | -2.99152200 |
| H  | 1.72628800  | -1.95437600 | -3.70282600 |
| H  | 0.31171700  | -2.18752100 | -2.66005200 |
| H  | 0.51689700  | -0.67046800 | -3.52930300 |
| Rh | 0.97817700  | 0.03965000  | -0.02559600 |
| C  | -0.19100400 | 2.75234800  | -0.45659500 |
| O  | 0.92436600  | 3.27073500  | -0.37721100 |
| O  | -0.46241700 | 1.47644200  | -0.43095400 |
| C  | -0.06246500 | 0.87734200  | 2.70494000  |
| O  | -1.20397800 | 0.40468900  | 2.40798100  |
| O  | 0.97186600  | 0.80236800  | 1.97722300  |
| C  | 0.06567900  | 1.61653900  | 4.02084300  |
| H  | 1.10856200  | 1.66114500  | 4.34007700  |
| H  | -0.30051900 | 2.64092000  | 3.88427500  |
| H  | -0.55138900 | 1.13576100  | 4.78393600  |
| C  | -1.45281100 | 3.60472800  | -0.58678900 |
| H  | -2.12288500 | 3.19387800  | -1.34775100 |
| H  | -1.99705100 | 3.58864800  | 0.36454200  |
| H  | -1.18467500 | 4.63516200  | -0.83013200 |
| C  | -5.03035700 | 0.05434400  | 0.62548000  |
| C  | -3.71837700 | -0.42955700 | 0.62630000  |
| C  | -3.02878300 | -0.51533700 | -0.58462900 |
| C  | -3.64312400 | -0.13191000 | -1.78269400 |
| C  | -4.95355000 | 0.33756300  | -1.76580000 |
| C  | -5.65613000 | 0.43546200  | -0.56055700 |
| H  | -5.56151300 | 0.12902000  | 1.57063100  |
| H  | -3.24709600 | -0.70542500 | 1.56130400  |
| H  | -3.07880400 | -0.20456400 | -2.70707800 |
| H  | -5.42451700 | 0.63635000  | -2.69866800 |
| H  | -6.67583800 | 0.80915200  | -0.54832400 |
| O  | -1.75258200 | -1.02741100 | -0.73913200 |
| N  | -0.92231600 | -1.07785300 | 0.42240500  |
| H  | -1.14809800 | -0.28820700 | 1.33223100  |
| C  | -0.80662800 | -2.39237300 | 0.93019700  |
| O  | -0.05865300 | -2.59465500 | 1.87337500  |
| C  | -1.62694100 | -3.48707500 | 0.27753100  |
| H  | -2.69677100 | -3.26172000 | 0.33521100  |

|                           |             |             |             |
|---------------------------|-------------|-------------|-------------|
| H                         | -1.38137100 | -3.58431000 | -0.78481700 |
| H                         | -1.41700500 | -4.42277800 | 0.79821700  |
| <b>INT<sub>I-II</sub></b> |             |             |             |
| C                         | 3.05858200  | 0.08735000  | -0.57522700 |
| C                         | 2.27864600  | 0.01442200  | -1.75351900 |
| C                         | 1.35772500  | -1.11522100 | -1.61430400 |
| C                         | 1.64724800  | -1.77702500 | -0.37253000 |
| C                         | 2.64162200  | -0.99761800 | 0.31324600  |
| C                         | 1.00167300  | -3.03973700 | 0.11114700  |
| H                         | 1.13032200  | -3.17963800 | 1.18632800  |
| H                         | -0.07325600 | -3.03505600 | -0.08295200 |
| H                         | 1.44856200  | -3.90248800 | -0.40103200 |
| C                         | 3.30208500  | -1.32640300 | 1.61799800  |
| H                         | 2.67700100  | -1.97655100 | 2.23412200  |
| H                         | 4.25402400  | -1.84682900 | 1.44310400  |
| H                         | 3.52011900  | -0.42275000 | 2.19505100  |
| C                         | 4.11953200  | 1.09026300  | -0.23616100 |
| H                         | 3.95368700  | 1.51741000  | 0.75813000  |
| H                         | 5.10968200  | 0.61569400  | -0.23456900 |
| H                         | 4.14392100  | 1.91448300  | -0.95300300 |
| C                         | 2.33027100  | 0.92254300  | -2.94427500 |
| H                         | 2.92414800  | 1.81778800  | -2.74528300 |
| H                         | 2.77783400  | 0.40354100  | -3.80216000 |
| H                         | 1.32653500  | 1.24599200  | -3.23726200 |
| C                         | 0.39543500  | -1.58644100 | -2.66053500 |
| H                         | 0.88387400  | -2.29581800 | -3.34318900 |
| H                         | -0.46151600 | -2.08501800 | -2.20281300 |
| H                         | 0.01788600  | -0.75225800 | -3.25846000 |
| Rh                        | 0.88759300  | 0.28214700  | -0.00387800 |
| C                         | 0.01469700  | 2.64491000  | 0.35510300  |
| O                         | -0.32034300 | 1.98405000  | -0.67658100 |
| O                         | 0.86768700  | 2.13793100  | 1.15860300  |
| C                         | -0.61117100 | 3.98321000  | 0.64730500  |
| H                         | -1.53292100 | 3.82369900  | 1.21913900  |
| H                         | 0.06312700  | 4.60091000  | 1.24522700  |
| H                         | -0.87398100 | 4.49127500  | -0.28367100 |
| C                         | -4.73012600 | 0.92901200  | 0.11867100  |
| C                         | -3.44779600 | 0.51673900  | 0.48661600  |
| C                         | -2.86089100 | -0.56293200 | -0.17854300 |
| C                         | -3.55905900 | -1.22651700 | -1.19640800 |
| C                         | -4.83870500 | -0.80489600 | -1.54857900 |
| C                         | -5.43376500 | 0.27853600  | -0.89606100 |
| H                         | -5.18309100 | 1.76906500  | 0.63990200  |

|   |             |             |             |
|---|-------------|-------------|-------------|
| H | -2.90166800 | 1.01569000  | 1.27641900  |
| H | -3.09287800 | -2.07463700 | -1.68950300 |
| H | -5.37325300 | -1.32839600 | -2.33742300 |
| H | -6.43189500 | 0.60651600  | -1.17217400 |
| O | -1.61415700 | -1.06873400 | 0.10071000  |
| N | -0.84700300 | -0.29770200 | 1.03473900  |
| C | -0.74500900 | -0.99163200 | 2.23401900  |
| O | -1.30500600 | -2.05271900 | 2.48287700  |
| C | 0.06352300  | -0.25064400 | 3.29378900  |
| H | 0.45416600  | 0.70817000  | 2.94939700  |
| H | -0.59211400 | -0.08746800 | 4.15611300  |
| H | 0.88646900  | -0.88778400 | 3.63653600  |

## TS-II

|    |             |             |             |
|----|-------------|-------------|-------------|
| C  | 1.51214200  | -1.72558700 | -1.20668400 |
| C  | 0.30207800  | -2.29318100 | -0.71605200 |
| C  | 0.26892200  | -2.09629100 | 0.72191800  |
| C  | 1.54243500  | -1.52248300 | 1.11265400  |
| C  | 2.29009900  | -1.25329900 | -0.06842400 |
| C  | 1.96869400  | -1.29969400 | 2.53276800  |
| H  | 2.92612900  | -0.77698800 | 2.59060100  |
| H  | 1.23565600  | -0.71804900 | 3.10107600  |
| H  | 2.08769100  | -2.26791100 | 3.03706800  |
| C  | 3.66102900  | -0.65519500 | -0.17478500 |
| H  | 3.96989300  | -0.18003100 | 0.75925000  |
| H  | 4.40493200  | -1.42471200 | -0.42263300 |
| H  | 3.69449300  | 0.10519100  | -0.96177500 |
| C  | 1.97952200  | -1.66402700 | -2.63045500 |
| H  | 2.33313200  | -0.65801800 | -2.87871500 |
| H  | 2.80947700  | -2.36326300 | -2.79909700 |
| H  | 1.17985200  | -1.92063400 | -3.33020500 |
| C  | -0.72220700 | -3.04335800 | -1.51336900 |
| H  | -0.73738200 | -2.72850200 | -2.56040700 |
| H  | -0.49045600 | -4.11732500 | -1.49378000 |
| H  | -1.72813000 | -2.91022300 | -1.10934900 |
| C  | -0.76661800 | -2.62563000 | 1.67063400  |
| H  | -0.51545600 | -3.64541000 | 1.99502500  |
| H  | -0.83806000 | -1.99790800 | 2.56343400  |
| H  | -1.75670000 | -2.65597800 | 1.20775200  |
| Rh | 0.32621500  | -0.09683200 | -0.19088300 |
| C  | 0.35589600  | 2.38796100  | -1.93195200 |
| O  | -0.90429800 | 2.41632300  | -1.82671300 |
| O  | 1.10621500  | 1.49095300  | -1.43442900 |
| C  | 1.02726400  | 3.52204100  | -2.68368700 |

|   |             |             |             |
|---|-------------|-------------|-------------|
| H | 1.16194300  | 4.36427500  | -1.99470800 |
| H | 2.00808100  | 3.21637300  | -3.05388500 |
| H | 0.39203500  | 3.85922500  | -3.50616000 |
| C | -2.66498800 | -0.31886800 | -1.40799600 |
| C | -1.78250000 | 0.31414500  | -0.49203700 |
| C | -2.29979300 | 0.59688900  | 0.80337300  |
| C | -3.63664300 | 0.32314600  | 1.14493100  |
| C | -4.45652700 | -0.28272900 | 0.20438900  |
| C | -3.97914800 | -0.61189100 | -1.08050200 |
| H | -2.30109500 | -0.52615200 | -2.41214400 |
| H | -1.28986100 | 1.34911600  | -1.09927100 |
| H | -3.99372900 | 0.56757400  | 2.14029700  |
| H | -5.48912100 | -0.50123000 | 0.46570800  |
| H | -4.64422700 | -1.06869900 | -1.80789600 |
| O | -1.51280900 | 1.09521400  | 1.75893400  |
| N | -0.17972000 | 1.36726000  | 1.24214200  |
| C | 0.62485900  | 1.74320100  | 2.29183800  |
| O | 0.29533700  | 1.77217600  | 3.47458200  |
| C | 1.99136600  | 2.24225100  | 1.83115200  |
| H | 2.15856600  | 2.12046100  | 0.75912600  |
| H | 2.05261500  | 3.30802400  | 2.07947900  |
| H | 2.77724900  | 1.73566700  | 2.40065700  |

### INT-1

|   |            |             |             |
|---|------------|-------------|-------------|
| C | 1.37062900 | -1.97579100 | -0.06397600 |
| C | 1.67071300 | -1.27687800 | 1.15284100  |
| C | 2.35839200 | -0.03331100 | 0.81388400  |
| C | 2.40442900 | 0.06711900  | -0.59016000 |
| C | 1.74538500 | -1.11273700 | -1.14745000 |
| C | 3.01670000 | 1.19150700  | -1.37037600 |
| H | 2.73248500 | 1.15039400  | -2.42565100 |
| H | 2.69590900 | 2.15610300  | -0.96661600 |
| H | 4.11343300 | 1.14203800  | -1.32208200 |
| C | 1.63887200 | -1.43571800 | -2.60694800 |
| H | 1.47492900 | -0.53457700 | -3.20451500 |
| H | 2.56401500 | -1.90917900 | -2.96605800 |
| H | 0.81202800 | -2.12267300 | -2.80529000 |
| C | 0.87998700 | -3.38831000 | -0.18082800 |
| H | 0.31005900 | -3.54592700 | -1.10082300 |
| H | 1.72816100 | -4.08681200 | -0.19660800 |
| H | 0.24103000 | -3.66849400 | 0.66140800  |
| C | 1.47170700 | -1.80296100 | 2.54194100  |
| H | 0.65866800 | -2.53256100 | 2.58189700  |
| H | 2.38598200 | -2.29782600 | 2.89988800  |



|    |             |             |             |
|----|-------------|-------------|-------------|
| H  | 1.23464800  | -0.99930300 | 3.24473700  |
| C  | 2.91244100  | 0.96532600  | 1.78579200  |
| H  | 4.01086200  | 0.93686200  | 1.78465200  |
| H  | 2.59187600  | 1.97639500  | 1.51855000  |
| H  | 2.57950700  | 0.75936200  | 2.80697700  |
| Rh | 0.17799100  | -0.09196000 | 0.02604600  |
| C  | -2.33554500 | -1.93768900 | -0.22937500 |
| C  | -1.75091400 | -0.66057400 | -0.10447700 |
| C  | -2.64823600 | 0.42857200  | -0.06289000 |
| C  | -4.04235400 | 0.28402200  | -0.13921100 |
| C  | -4.56809400 | -0.99361300 | -0.26173000 |
| C  | -3.71429100 | -2.10915200 | -0.30695600 |
| H  | -1.69985000 | -2.81691200 | -0.26671100 |
| H  | -4.67950100 | 1.16259600  | -0.10190000 |
| H  | -5.64487000 | -1.12821400 | -0.32237200 |
| H  | -4.13414300 | -3.10745300 | -0.40262800 |
| O  | -2.16361000 | 1.68862400  | 0.05548500  |
| N  | -0.74886500 | 1.66771600  | 0.12218700  |
| C  | -0.24242100 | 2.94722700  | 0.23381100  |
| O  | 0.97465700  | 3.12086400  | 0.30603500  |
| C  | -1.21837100 | 4.11033500  | 0.26332800  |
| H  | -1.82393300 | 4.13703200  | -0.64823300 |
| H  | -1.91156200 | 4.01992000  | 1.10570900  |
| H  | -0.64019700 | 5.03116600  | 0.35365500  |

**INT-2**

|    |            |             |             |
|----|------------|-------------|-------------|
| Rh | 2.58685400 | 8.55367000  | -2.38575900 |
| C  | 2.67883800 | 11.00627400 | -4.30399000 |
| C  | 2.32788700 | 10.46804500 | -3.06350200 |
| C  | 1.77094300 | 11.33454800 | -2.11054800 |
| C  | 1.58901700 | 12.69756400 | -2.36660200 |
| C  | 1.96535900 | 13.21110300 | -3.60759100 |
| C  | 2.50676000 | 12.36956800 | -4.58118000 |
| H  | 3.08693000 | 10.36087000 | -5.07822800 |
| H  | 1.15496800 | 13.33193700 | -1.59930000 |
| H  | 1.82522400 | 14.26902600 | -3.81324900 |
| H  | 2.79038100 | 12.76491200 | -5.55322500 |
| O  | 1.40287400 | 10.86768300 | -0.88384700 |
| N  | 1.53100900 | 9.44099000  | -0.83701100 |
| C  | 1.07073300 | 8.91068800  | 0.29384700  |
| O  | 1.14503500 | 7.66503500  | 0.49698700  |
| C  | 3.83824400 | 6.71099800  | -1.50694500 |
| C  | 3.97410200 | 6.74076800  | -2.92785600 |
| C  | 4.58452200 | 7.99150700  | -3.32034700 |

|   |             |             |             |
|---|-------------|-------------|-------------|
| C | 4.82628300  | 8.74478300  | -2.11976400 |
| C | 4.34358200  | 7.95746100  | -1.00769900 |
| C | 5.57823700  | 10.04009300 | -2.02581300 |
| H | 6.66062100  | 9.85542100  | -1.98458700 |
| H | 5.37671200  | 10.68388400 | -2.88605700 |
| H | 5.30381900  | 10.59910600 | -1.12717600 |
| C | 4.44996500  | 8.32614100  | 0.44086000  |
| H | 5.38230400  | 7.92474900  | 0.86226500  |
| H | 4.46257300  | 9.41035300  | 0.57994900  |
| H | 3.61227400  | 7.91535500  | 1.00854000  |
| C | 5.08173700  | 8.33595300  | -4.69462600 |
| H | 5.19179700  | 9.41602800  | -4.81920200 |
| H | 6.06502300  | 7.88088800  | -4.87924400 |
| H | 4.40596000  | 7.97891700  | -5.47868500 |
| C | 3.64971900  | 5.60216400  | -3.85022100 |
| H | 3.58759400  | 5.92291600  | -4.89367300 |
| H | 4.43611300  | 4.83763900  | -3.79200800 |
| H | 2.70604400  | 5.11409600  | -3.58529800 |
| C | 3.34300600  | 5.56584700  | -0.67258700 |
| H | 2.77970000  | 4.84610900  | -1.27444000 |
| H | 4.18175600  | 5.02245200  | -0.21510200 |
| H | 2.68561000  | 5.92626200  | 0.12173500  |
| C | 0.43427900  | 7.53043800  | -2.96552400 |
| H | 0.66034100  | 6.53171500  | -2.60156700 |
| C | -0.81233200 | 8.08272000  | -2.43850100 |
| C | -1.44832700 | 7.41926400  | -1.35672700 |
| C | -1.47772800 | 9.17182600  | -3.03664400 |
| C | -2.73586000 | 7.80274300  | -0.96007400 |
| C | -2.74121500 | 9.56690200  | -2.61609800 |
| H | -1.00367600 | 9.70290600  | -3.85635300 |
| C | -3.37989400 | 8.86636200  | -1.58467500 |
| H | -3.19831100 | 7.25926000  | -0.14207400 |
| H | -3.23560400 | 10.40537500 | -3.09819800 |
| H | -4.37532900 | 9.15999400  | -1.26135200 |
| O | -0.84684900 | 6.38677600  | -0.70643600 |
| H | -0.01087100 | 6.73631000  | -0.28358600 |
| C | 1.16068600  | 8.02172300  | -4.04521300 |
| H | 0.84602100  | 8.91742600  | -4.56676100 |
| H | 1.77192900  | 7.34287400  | -4.62968000 |
| C | 0.45935900  | 9.82783900  | 1.33922400  |
| H | 1.18019400  | 10.58123000 | 1.67406500  |
| H | -0.40102500 | 10.36543800 | 0.92823900  |
| H | 0.14421500  | 9.21381100  | 2.18441800  |

**TS-1**

|    |             |             |             |
|----|-------------|-------------|-------------|
| Rh | 2.52108200  | 8.65588700  | -2.29532900 |
| C  | 3.04606400  | 11.24274700 | -4.14655500 |
| C  | 2.26553300  | 10.63959300 | -3.14030500 |
| C  | 1.77961200  | 11.48520400 | -2.11203600 |
| C  | 2.02526600  | 12.86156100 | -2.11872000 |
| C  | 2.77707100  | 13.42465300 | -3.14805200 |
| C  | 3.30434800  | 12.61196500 | -4.15805100 |
| H  | 3.41334100  | 10.62971500 | -4.96622800 |
| H  | 1.64026100  | 13.46570900 | -1.30288700 |
| H  | 2.96331800  | 14.49504700 | -3.15286400 |
| H  | 3.89911800  | 13.04499000 | -4.95751900 |
| O  | 1.05631800  | 10.98909100 | -1.08033000 |
| N  | 1.38974200  | 9.60346300  | -0.82563900 |
| C  | 0.79565100  | 9.13388700  | 0.27609700  |
| O  | 0.90898300  | 7.92190100  | 0.59188400  |
| C  | 3.59830500  | 6.89121000  | -1.28901700 |
| C  | 3.58719700  | 6.65386700  | -2.69209800 |
| C  | 4.30640400  | 7.72827300  | -3.32568200 |
| C  | 4.88076700  | 8.56718400  | -2.28336200 |
| C  | 4.40538700  | 8.08806500  | -1.04422800 |
| C  | 5.81763800  | 9.71579400  | -2.51101300 |
| H  | 6.81107000  | 9.35303100  | -2.80858900 |
| H  | 5.46054700  | 10.38667000 | -3.29899300 |
| H  | 5.94272100  | 10.31419300 | -1.60467000 |
| C  | 4.70254300  | 8.62693800  | 0.32314300  |
| H  | 5.48709500  | 8.03290400  | 0.81203700  |
| H  | 5.04299200  | 9.66539000  | 0.28708300  |
| H  | 3.81210300  | 8.58404400  | 0.95681200  |
| C  | 4.65201300  | 7.80624400  | -4.78646500 |
| H  | 4.92788700  | 8.82219700  | -5.08296000 |
| H  | 5.50896500  | 7.15760700  | -5.01698800 |
| H  | 3.82210200  | 7.48178800  | -5.42279600 |
| C  | 2.95351100  | 5.47467200  | -3.37033100 |
| H  | 2.77084800  | 5.66800800  | -4.43246800 |
| H  | 3.60933200  | 4.59550000  | -3.30904100 |
| H  | 1.99914200  | 5.22021400  | -2.89888800 |
| C  | 3.15586600  | 5.93156900  | -0.22484700 |
| H  | 2.39239100  | 5.24395700  | -0.59567900 |
| H  | 4.01559700  | 5.33051800  | 0.10672600  |
| H  | 2.74284900  | 6.45395300  | 0.63919700  |
| C  | 0.66087200  | 8.21890600  | -3.31200600 |
| H  | 0.98855900  | 7.30182500  | -3.79906900 |
| C  | -0.67187000 | 8.06788400  | -2.66708400 |

|   |             |             |             |
|---|-------------|-------------|-------------|
| C | -0.90733600 | 7.00656900  | -1.76350600 |
| C | -1.77010600 | 8.87035200  | -3.02592000 |
| C | -2.19282500 | 6.75011700  | -1.28117300 |
| C | -3.05061800 | 8.62517000  | -2.53153900 |
| H | -1.63684300 | 9.68122800  | -3.73650200 |
| C | -3.26638000 | 7.55297400  | -1.66393300 |
| H | -2.32102200 | 5.92363000  | -0.58881500 |
| H | -3.87819300 | 9.25819500  | -2.84029400 |
| H | -4.26257700 | 7.34773400  | -1.28065100 |
| O | 0.13411300  | 6.22301800  | -1.33732900 |
| H | 0.61522400  | 6.77300700  | -0.65515200 |
| C | 1.04376700  | 9.45094900  | -3.97870100 |
| H | 0.28764000  | 10.23062200 | -4.00890300 |
| H | 1.54565600  | 9.33492500  | -4.93551700 |
| C | -0.00455200 | 10.08177800 | 1.15256400  |
| H | 0.56531100  | 10.98169800 | 1.40210100  |
| H | -0.91204700 | 10.40528300 | 0.63088900  |
| H | -0.28163900 | 9.54616900  | 2.06199400  |

### INT-3

|    |            |             |             |
|----|------------|-------------|-------------|
| Rh | 2.50017600 | 8.79113300  | -2.07260500 |
| C  | 1.41956300 | 11.79986700 | -4.42892000 |
| C  | 1.22377100 | 11.35086300 | -3.11063100 |
| C  | 2.08591800 | 11.87337400 | -2.12299500 |
| C  | 3.07005900 | 12.81901400 | -2.44738100 |
| C  | 3.21972900 | 13.25762800 | -3.75896100 |
| C  | 2.39496900 | 12.73681400 | -4.76162300 |
| H  | 0.75745400 | 11.41694300 | -5.20289500 |
| H  | 3.69738600 | 13.19893200 | -1.64675100 |
| H  | 3.97961800 | 13.99650600 | -3.99894000 |
| H  | 2.50188200 | 13.07036200 | -5.79006500 |
| O  | 1.99013200 | 11.56247400 | -0.78947900 |
| N  | 1.85243100 | 10.14242600 | -0.56929000 |
| C  | 1.50897600 | 9.85092900  | 0.68268600  |
| O  | 1.30001000 | 8.64416100  | 0.99439700  |
| C  | 3.09170400 | 6.83565100  | -1.39782700 |
| C  | 3.19064100 | 6.81861400  | -2.84502900 |
| C  | 4.14618400 | 7.81221500  | -3.18831600 |
| C  | 4.81875900 | 8.27767300  | -1.95810500 |
| C  | 4.19424400 | 7.66871000  | -0.87192800 |
| C  | 5.94779700 | 9.26379500  | -1.94579500 |
| H  | 6.86224300 | 8.81864800  | -2.36124400 |
| H  | 5.71348600 | 10.14744100 | -2.55019800 |
| H  | 6.17308200 | 9.60439200  | -0.93220300 |

|   |             |             |             |
|---|-------------|-------------|-------------|
| C | 4.50397700  | 7.82246200  | 0.58523700  |
| H | 4.98063900  | 6.90987300  | 0.96937100  |
| H | 5.18620100  | 8.65688800  | 0.76882500  |
| H | 3.58737800  | 7.98892900  | 1.15807200  |
| C | 4.57263200  | 8.21055100  | -4.56905900 |
| H | 4.75293100  | 9.28848500  | -4.63516200 |
| H | 5.50922800  | 7.70398800  | -4.84175400 |
| H | 3.82056300  | 7.94705600  | -5.31692500 |
| C | 2.48737900  | 5.87547400  | -3.77118300 |
| H | 2.41225100  | 6.28195200  | -4.78402100 |
| H | 3.04490000  | 4.93053700  | -3.83607000 |
| H | 1.47512700  | 5.64579700  | -3.43151800 |
| C | 2.24896600  | 5.92495400  | -0.56203600 |
| H | 1.35472900  | 5.60181000  | -1.10148400 |
| H | 2.82353700  | 5.02665700  | -0.29114300 |
| H | 1.93338700  | 6.43027800  | 0.35301200  |
| C | 0.60682300  | 8.91656800  | -3.02501000 |
| H | 0.94835700  | 8.83659500  | -4.06684400 |
| C | -0.40360000 | 7.83480800  | -2.80154400 |
| C | -1.12459000 | 7.63891500  | -1.59495500 |
| C | -0.73430000 | 6.99435300  | -3.88522100 |
| C | -2.12408400 | 6.65787200  | -1.52387000 |
| C | -1.72211800 | 6.01419200  | -3.80906400 |
| H | -0.20968400 | 7.14271300  | -4.82708400 |
| C | -2.42817900 | 5.84928800  | -2.61614100 |
| H | -2.65422400 | 6.55614400  | -0.58161000 |
| H | -1.94762100 | 5.39995000  | -4.67683200 |
| H | -3.20880000 | 5.09717000  | -2.53502200 |
| O | -0.95167700 | 8.41403000  | -0.48675900 |
| H | -0.03619000 | 8.36776800  | -0.10844900 |
| C | 0.11067000  | 10.35942700 | -2.81581700 |
| H | -0.28001900 | 10.48572600 | -1.80553500 |
| H | -0.72011200 | 10.55584400 | -3.51070200 |
| C | 1.34666600  | 10.96086800 | 1.70295400  |
| H | 2.24645900  | 11.58108000 | 1.76815800  |
| H | 0.52081800  | 11.62192500 | 1.41824000  |
| H | 1.13150200  | 10.50620100 | 2.67131000  |

**TS-2**

|    |            |             |             |
|----|------------|-------------|-------------|
| Rh | 2.36113300 | 8.60212000  | -1.77978000 |
| C  | 0.39520000 | 12.32906100 | -4.16856600 |
| C  | 0.83377900 | 11.38126300 | -3.23886500 |
| C  | 2.06911700 | 11.60882500 | -2.58458800 |
| C  | 2.78360500 | 12.80160800 | -2.83665500 |

|   |             |             |             |
|---|-------------|-------------|-------------|
| C | 2.32316000  | 13.72104500 | -3.77327700 |
| C | 1.12512900  | 13.48570900 | -4.45221100 |
| H | -0.55409800 | 12.15934800 | -4.67253700 |
| H | 3.71310600  | 12.96260400 | -2.29813000 |
| H | 2.89893000  | 14.62215300 | -3.96950000 |
| H | 0.75407300  | 14.19981200 | -5.18180700 |
| O | 2.62648900  | 10.74977700 | -1.72587700 |
| N | 1.46179800  | 9.57669500  | -0.33100500 |
| C | 1.96872800  | 9.76003000  | 0.91954300  |
| O | 1.50581800  | 8.99684800  | 1.77785700  |
| C | 2.95213400  | 6.45693400  | -1.62291700 |
| C | 3.24621800  | 6.85791400  | -2.97543300 |
| C | 4.20248800  | 7.90831000  | -2.90326000 |
| C | 4.65917400  | 8.02728700  | -1.51390600 |
| C | 3.90588400  | 7.13257100  | -0.73631400 |
| C | 5.73851700  | 8.96714200  | -1.06511700 |
| H | 6.70957000  | 8.68550500  | -1.49408300 |
| H | 5.52570500  | 9.99374200  | -1.38395600 |
| H | 5.84478500  | 8.97002200  | 0.02286700  |
| C | 4.00950100  | 6.87478000  | 0.73805000  |
| H | 4.21598000  | 5.81362500  | 0.92670100  |
| H | 4.81786600  | 7.45528400  | 1.19094300  |
| H | 3.08287500  | 7.13086500  | 1.26481900  |
| C | 4.81356300  | 8.64856300  | -4.05721700 |
| H | 4.96841100  | 9.70508300  | -3.81687500 |
| H | 5.79250800  | 8.22146900  | -4.31636400 |
| H | 4.18325400  | 8.59750500  | -4.94905900 |
| C | 2.71198500  | 6.22431200  | -4.22318100 |
| H | 2.60847100  | 6.94506000  | -5.04061500 |
| H | 3.40007900  | 5.43900800  | -4.56582400 |
| H | 1.73865700  | 5.75994900  | -4.05459700 |
| C | 2.04732700  | 5.33549900  | -1.20480100 |
| H | 1.16608900  | 5.26946800  | -1.84812300 |
| H | 2.57597000  | 4.37221900  | -1.25192600 |
| H | 1.69828900  | 5.47369900  | -0.17755500 |
| C | 0.56577500  | 8.81060200  | -2.96395800 |
| H | 0.98504800  | 8.68966700  | -3.96846100 |
| C | -0.40596800 | 7.70569400  | -2.70681600 |
| C | -1.15675900 | 7.56419200  | -1.50751000 |
| C | -0.66825300 | 6.77178800  | -3.73266800 |
| C | -2.08690900 | 6.52137800  | -1.37020200 |
| C | -1.59759000 | 5.74410400  | -3.60023700 |
| H | -0.14457300 | 6.89343600  | -4.67729900 |
| C | -2.31155300 | 5.61993800  | -2.40333800 |

|   |             |             |             |
|---|-------------|-------------|-------------|
| H | -2.62694200 | 6.45264700  | -0.43081400 |
| H | -1.77662800 | 5.06073900  | -4.42566600 |
| H | -3.04320800 | 4.82606600  | -2.27822300 |
| O | -1.05480400 | 8.40231900  | -0.45020100 |
| H | -0.20677200 | 8.90462600  | -0.46409100 |
| C | -0.04527100 | 10.21531100 | -2.85621200 |
| H | -0.43638900 | 10.38614000 | -1.84828200 |
| H | -0.92461700 | 10.22765700 | -3.51677900 |
| C | 2.93105400  | 10.88197100 | 1.22182100  |
| H | 3.82411800  | 10.81433400 | 0.59582100  |
| H | 2.45945800  | 11.84480900 | 1.00111700  |
| H | 3.19576000  | 10.83241600 | 2.28113600  |

#### INT-4

|    |             |             |             |
|----|-------------|-------------|-------------|
| Rh | 2.39078200  | 8.73687500  | -1.56386400 |
| C  | 0.43325600  | 12.34087000 | -4.15315500 |
| C  | 0.94696400  | 11.45521000 | -3.20451800 |
| C  | 2.33897800  | 11.47055700 | -2.93560800 |
| C  | 3.16694000  | 12.38022200 | -3.63061600 |
| C  | 2.62423400  | 13.27227300 | -4.55085600 |
| C  | 1.25308500  | 13.25441100 | -4.82206100 |
| H  | -0.63449700 | 12.32237100 | -4.36269600 |
| H  | 4.22908400  | 12.38775600 | -3.40099700 |
| H  | 3.27344300  | 13.97924300 | -5.06165000 |
| H  | 0.82552900  | 13.94231700 | -5.54595700 |
| O  | 2.88595300  | 10.68026900 | -2.01322200 |
| N  | 1.30858100  | 8.96585500  | -0.03440700 |
| C  | 1.65513100  | 8.63286100  | 1.24473300  |
| O  | 1.65574000  | 7.48390000  | 1.69796800  |
| C  | 3.23886900  | 6.63156200  | -1.38385900 |
| C  | 3.22755000  | 6.97209500  | -2.79337500 |
| C  | 4.13922700  | 8.04581500  | -2.98173900 |
| C  | 4.80121600  | 8.30345600  | -1.71526700 |
| C  | 4.28123300  | 7.41179200  | -0.74580000 |
| C  | 5.81296900  | 9.38604600  | -1.51992200 |
| H  | 6.63553500  | 9.29317600  | -2.23982300 |
| H  | 5.33355600  | 10.36050700 | -1.68315900 |
| H  | 6.23847300  | 9.37420300  | -0.51352600 |
| C  | 4.73653500  | 7.23105400  | 0.66930200  |
| H  | 5.32711200  | 6.30866900  | 0.75884900  |
| H  | 5.36611500  | 8.06008800  | 1.00401100  |
| H  | 3.88697200  | 7.13735700  | 1.35393000  |
| C  | 4.47958000  | 8.73383000  | -4.26933000 |
| H  | 4.47500600  | 9.82175600  | -4.14995700 |

|   |             |             |             |
|---|-------------|-------------|-------------|
| H | 5.48042400  | 8.43937800  | -4.61374900 |
| H | 3.77045100  | 8.48307500  | -5.06263500 |
| C | 2.53070200  | 6.18864500  | -3.86032600 |
| H | 2.40107400  | 6.76959800  | -4.77720800 |
| H | 3.13341400  | 5.30517600  | -4.11401800 |
| H | 1.54761100  | 5.83867900  | -3.53972200 |
| C | 2.51128100  | 5.48092300  | -0.75337900 |
| H | 1.63115600  | 5.19895800  | -1.33718800 |
| H | 3.17219500  | 4.60379000  | -0.69578300 |
| H | 2.17983200  | 5.73846700  | 0.25564800  |
| C | 0.57211400  | 9.00951500  | -2.76251100 |
| H | 1.04782000  | 8.97579900  | -3.74697500 |
| C | -0.45930100 | 7.94116000  | -2.69499500 |
| C | -1.34681200 | 7.75558600  | -1.59909100 |
| C | -0.67758500 | 7.13959100  | -3.83787000 |
| C | -2.38197200 | 6.80949200  | -1.67853700 |
| C | -1.70242400 | 6.20336800  | -3.91493500 |
| H | -0.04045300 | 7.29893500  | -4.70374500 |
| C | -2.56138900 | 6.04111000  | -2.82125800 |
| H | -3.03143200 | 6.70260500  | -0.81528300 |
| H | -1.84261800 | 5.62013800  | -4.82050000 |
| H | -3.37039700 | 5.31640100  | -2.86206400 |
| O | -1.26923000 | 8.46815300  | -0.45926500 |
| H | -0.34741100 | 8.82859900  | -0.32703100 |
| C | 0.08595800  | 10.45093900 | -2.48841600 |
| H | 0.05045600  | 10.65539500 | -1.41412400 |
| H | -0.94567900 | 10.53741500 | -2.85464000 |
| C | 1.93771200  | 9.84486300  | 2.13076100  |
| H | 2.21423800  | 10.72884900 | 1.54925500  |
| H | 1.03770100  | 10.07681300 | 2.71178500  |
| H | 2.73766200  | 9.58724100  | 2.83186600  |

**TS-3**

|    |            |             |            |
|----|------------|-------------|------------|
| Rh | 0.04712400 | -0.60407600 | 0.06242500 |
| C  | 3.29179100 | 2.96309600  | 0.64734400 |
| C  | 2.38137800 | 1.91238900  | 0.77462100 |
| C  | 2.83596600 | 0.57814400  | 0.60251300 |
| C  | 4.20410400 | 0.35115800  | 0.31999500 |
| C  | 5.09559100 | 1.41460200  | 0.22937300 |
| C  | 4.64407800 | 2.73000800  | 0.38520500 |
| H  | 2.93516200 | 3.98376700  | 0.77294100 |
| H  | 4.54267900 | -0.67568400 | 0.20891400 |
| H  | 6.14669400 | 1.21918700  | 0.03042000 |
| H  | 5.33686000 | 3.56302900  | 0.30646000 |



|   |             |             |             |
|---|-------------|-------------|-------------|
| O | 2.01872600  | -0.45826100 | 0.73277300  |
| N | -0.80876800 | -0.37200300 | 1.78025800  |
| C | -1.51899700 | -1.39526900 | 2.38734500  |
| O | -2.72672300 | -1.56704200 | 2.23549100  |
| C | -1.38617800 | -1.73257800 | -1.27250000 |
| C | -0.45947600 | -1.02407000 | -2.13949800 |
| C | 0.83930800  | -1.55024400 | -1.90980700 |
| C | 0.71812200  | -2.64331900 | -0.96286600 |
| C | -0.65454400 | -2.78857600 | -0.61320000 |
| C | 1.87989500  | -3.43725400 | -0.45881100 |
| H | 2.43203900  | -3.89710700 | -1.28806400 |
| H | 2.56688800  | -2.76804800 | 0.07491000  |
| H | 1.56876800  | -4.23157600 | 0.22412600  |
| C | -1.27150500 | -3.86993200 | 0.22012300  |
| H | -1.70032300 | -4.64316900 | -0.43239700 |
| H | -0.53784500 | -4.35643700 | 0.86820000  |
| H | -2.08210400 | -3.48546900 | 0.84572600  |
| C | 2.11345800  | -1.15371900 | -2.59265200 |
| H | 2.94234400  | -1.09218900 | -1.88151700 |
| H | 2.38501700  | -1.88890200 | -3.36277400 |
| H | 2.02381500  | -0.18039200 | -3.08240700 |
| C | -0.84896800 | -0.05595300 | -3.21107600 |
| H | -0.03182700 | 0.62409600  | -3.46744900 |
| H | -1.11144700 | -0.61108600 | -4.12262700 |
| H | -1.71525000 | 0.54399200  | -2.92714400 |
| C | -2.87503300 | -1.55084700 | -1.22706300 |
| H | -3.16373600 | -0.55526800 | -1.57333800 |
| H | -3.37167400 | -2.29105900 | -1.87059600 |
| H | -3.25263000 | -1.67163300 | -0.20735600 |
| C | 0.05588600  | 1.61897700  | -0.12576900 |
| H | 0.61669900  | 1.70028700  | -1.06129300 |
| C | -1.29093300 | 2.16355500  | -0.28925300 |
| C | -2.23420400 | 2.23361000  | 0.80003900  |
| C | -1.68097600 | 2.71825600  | -1.53382300 |
| C | -3.50843000 | 2.82768900  | 0.57344900  |
| C | -2.91708300 | 3.31224100  | -1.72341200 |
| H | -0.95813200 | 2.71961700  | -2.34536000 |
| C | -3.83811600 | 3.36238500  | -0.65432800 |
| H | -4.19799300 | 2.85000800  | 1.41142800  |
| H | -3.16917100 | 3.75514200  | -2.68280900 |
| H | -4.81026400 | 3.82662800  | -0.80056000 |
| O | -1.95653100 | 1.76239700  | 1.98130500  |
| H | -1.28355500 | 0.73237900  | 1.94782900  |
| C | 0.92232300  | 2.13213100  | 1.04918600  |

|   |             |             |            |
|---|-------------|-------------|------------|
| H | 0.62200300  | 1.67050300  | 1.99200100 |
| H | 0.73073400  | 3.20864400  | 1.15510500 |
| C | -0.68983600 | -2.25251300 | 3.33478300 |
| H | 0.26892400  | -2.52835600 | 2.88467600 |
| H | -0.46485000 | -1.67107500 | 4.23674400 |
| H | -1.25651600 | -3.14296700 | 3.61923500 |

**INT-5**

|    |             |             |             |
|----|-------------|-------------|-------------|
| Rh | 3.69677000  | 9.30604100  | -1.69973900 |
| C  | -1.20939700 | 11.36668600 | -2.11658800 |
| C  | -0.27044800 | 10.33675600 | -2.21585800 |
| C  | 1.06627300  | 10.64437200 | -2.59392300 |
| C  | 1.39401500  | 11.99467700 | -2.85579800 |
| C  | 0.43714800  | 13.00361100 | -2.75142900 |
| C  | -0.87249600 | 12.69765100 | -2.37567600 |
| H  | -2.22888300 | 11.12026500 | -1.82233800 |
| H  | 2.41251900  | 12.22414600 | -3.15810400 |
| H  | 0.71749300  | 14.03229700 | -2.96646200 |
| H  | -1.62027000 | 13.48046200 | -2.28526500 |
| O  | 1.95621200  | 9.66221700  | -2.73332600 |
| N  | 3.40521600  | 10.94765000 | -0.60826300 |
| C  | 4.19926600  | 11.54573900 | 0.32141100  |
| O  | 5.31418900  | 11.12531400 | 0.65391800  |
| C  | 4.12076700  | 7.18220700  | -1.34077000 |
| C  | 4.13324100  | 7.38060000  | -2.76300600 |
| C  | 5.13289800  | 8.36395200  | -3.04536000 |
| C  | 5.81653300  | 8.71130500  | -1.79732300 |
| C  | 5.19241800  | 7.97923900  | -0.74788400 |
| C  | 6.99640000  | 9.62126300  | -1.65168500 |
| H  | 6.86318300  | 10.26778400 | -0.77958600 |
| H  | 7.91585000  | 9.03351100  | -1.52188200 |
| H  | 7.12826400  | 10.25215800 | -2.53526600 |
| C  | 5.61662500  | 7.96573400  | 0.68848600  |
| H  | 6.51715000  | 7.34780500  | 0.81101100  |
| H  | 5.83122900  | 8.98209300  | 1.02774000  |
| H  | 4.83783700  | 7.54584100  | 1.33076800  |
| C  | 5.47214000  | 8.89384200  | -4.40395600 |
| H  | 4.60221700  | 8.87142400  | -5.06529400 |
| H  | 5.83509100  | 9.92408600  | -4.35346300 |
| H  | 6.26388900  | 8.28451200  | -4.86231100 |
| C  | 3.17316500  | 6.79451400  | -3.75717000 |
| H  | 2.38718000  | 7.52084200  | -4.00059000 |
| H  | 3.68831800  | 6.51688800  | -4.68315700 |
| H  | 2.68873700  | 5.90026300  | -3.35833700 |

|   |             |             |             |
|---|-------------|-------------|-------------|
| C | 3.22412000  | 6.24791400  | -0.59095900 |
| H | 2.24783800  | 6.12956400  | -1.06803000 |
| H | 3.69773000  | 5.25702300  | -0.52899800 |
| H | 3.05909700  | 6.59445300  | 0.43290500  |
| C | -1.21317000 | 8.25525700  | -3.22519800 |
| H | -1.73921900 | 8.94408900  | -3.88950300 |
| C | -1.15521100 | 6.95441400  | -3.63924400 |
| C | -0.45704000 | 5.87825100  | -2.86378000 |
| C | -1.77179200 | 6.60270700  | -4.90899300 |
| C | -0.39908200 | 4.56150800  | -3.50055400 |
| C | -1.70226700 | 5.34795100  | -5.41899500 |
| H | -2.29205300 | 7.39041300  | -5.44981300 |
| C | -0.99715300 | 4.31652100  | -4.69579400 |
| H | 0.12077600  | 3.78494400  | -2.94727400 |
| H | -2.16690000 | 5.10745200  | -6.37042700 |
| H | -0.95252600 | 3.31858200  | -5.12723500 |
| O | 0.04398600  | 6.06909600  | -1.74561800 |
| H | 2.54177100  | 11.45065500 | -0.80092600 |
| C | -0.65797800 | 8.89050700  | -1.98568400 |
| H | 0.17886400  | 8.29991800  | -1.61308200 |
| H | -1.44166900 | 8.83069500  | -1.21121900 |
| C | 3.62864300  | 12.79641800 | 0.99310900  |
| H | 2.94568400  | 13.35345700 | 0.34326100  |
| H | 3.07376900  | 12.50298300 | 1.89291600  |
| H | 4.45240400  | 13.44409400 | 1.30220000  |

**TS-4**

|    |             |             |             |
|----|-------------|-------------|-------------|
| Rh | 3.08109700  | 8.65228400  | -1.82383600 |
| C  | -0.60240700 | 12.27487500 | -2.26068500 |
| C  | 0.00078300  | 11.02812800 | -2.44927100 |
| C  | 1.34697700  | 10.94921200 | -2.88964700 |
| C  | 2.05318000  | 12.15489400 | -3.09265800 |
| C  | 1.44016400  | 13.38802200 | -2.89098900 |
| C  | 0.10651000  | 13.45811900 | -2.47385500 |
| H  | -1.64045000 | 12.31853900 | -1.93519200 |
| H  | 3.08752400  | 12.09298600 | -3.41911200 |
| H  | 2.00425900  | 14.30203800 | -3.06195800 |
| H  | -0.37445600 | 14.41974900 | -2.31890000 |
| O  | 1.89776900  | 9.76545000  | -3.14483300 |
| N  | 2.45386000  | 9.86482300  | -0.32147900 |
| C  | 3.11591300  | 10.67644100 | 0.52942500  |
| O  | 4.34720400  | 10.69479000 | 0.68750500  |
| C  | 4.27538900  | 6.75770600  | -1.67183700 |
| C  | 4.04995100  | 7.05254500  | -3.08266100 |

|   |             |             |             |
|---|-------------|-------------|-------------|
| C | 4.64341700  | 8.30817100  | -3.36378600 |
| C | 5.19761600  | 8.83643600  | -2.11932300 |
| C | 5.02233100  | 7.82283400  | -1.09111400 |
| C | 5.99191300  | 10.09351800 | -1.95852000 |
| H | 5.73783300  | 10.57002800 | -1.00662500 |
| H | 7.06729500  | 9.86450200  | -1.96716200 |
| H | 5.79197200  | 10.80051000 | -2.76848100 |
| C | 5.60208800  | 7.86597500  | 0.29025400  |
| H | 6.65566900  | 7.55281600  | 0.26210200  |
| H | 5.53364700  | 8.87505300  | 0.70042200  |
| H | 5.07309500  | 7.18808400  | 0.96592900  |
| C | 4.62289200  | 8.99431800  | -4.69641900 |
| H | 3.59459200  | 9.24742000  | -4.97803900 |
| H | 5.20193700  | 9.92071100  | -4.67842200 |
| H | 5.04894400  | 8.34442200  | -5.47020200 |
| C | 3.37639600  | 6.15759000  | -4.07980900 |
| H | 2.87033600  | 6.73929600  | -4.85571100 |
| H | 4.11259800  | 5.50867300  | -4.57527100 |
| H | 2.63310600  | 5.51074600  | -3.60752800 |
| C | 3.83911400  | 5.50216700  | -0.98500500 |
| H | 2.82905700  | 5.21720000  | -1.28867100 |
| H | 4.51560500  | 4.67519000  | -1.24207500 |
| H | 3.84297300  | 5.61756500  | 0.10105000  |
| C | -0.71996300 | 8.78830500  | -3.34202700 |
| H | -1.13342500 | 9.20442100  | -4.26335400 |
| C | -0.41572000 | 7.45240700  | -3.36727600 |
| C | 0.23418000  | 6.74264600  | -2.23341700 |
| C | -0.83090400 | 6.67495400  | -4.51800600 |
| C | 0.10505900  | 5.29241900  | -2.23525100 |
| C | -0.82330700 | 5.31443500  | -4.50172000 |
| H | -1.20705100 | 7.21554900  | -5.38397600 |
| C | -0.38178100 | 4.62343400  | -3.32075600 |
| H | 0.45637200  | 4.76846600  | -1.35135300 |
| H | -1.17442200 | 4.74432000  | -5.35618700 |
| H | -0.42847600 | 3.53646600  | -3.30483500 |
| O | 0.88865100  | 7.33031200  | -1.34169000 |
| H | 1.46623600  | 10.08724900 | -0.39478200 |
| C | -0.74265500 | 9.72927000  | -2.18359600 |
| H | -0.37015300 | 9.22362200  | -1.29067600 |
| H | -1.80208800 | 9.97935100  | -2.01270000 |
| C | 2.24634600  | 11.66198200 | 1.31945900  |
| H | 2.07676400  | 12.56129400 | 0.71463000  |
| H | 1.26848000  | 11.24410500 | 1.58306900  |
| H | 2.77472900  | 11.95257900 | 2.23022800  |

**INT-6**

|    |             |             |             |
|----|-------------|-------------|-------------|
| Rh | 3.10448700  | 8.33073300  | -1.32735600 |
| C  | -0.49990800 | 12.63416500 | -2.74403200 |
| C  | -0.31323000 | 11.31922400 | -3.15032800 |
| C  | 0.72849700  | 11.00491300 | -4.02992100 |
| C  | 1.58691000  | 11.97662400 | -4.53498000 |
| C  | 1.38743100  | 13.29922000 | -4.11767100 |
| C  | 0.35847600  | 13.63038800 | -3.23273800 |
| H  | -1.30364800 | 12.89173200 | -2.05821900 |
| H  | 2.36983000  | 11.71760300 | -5.24041100 |
| H  | 2.04089200  | 14.07930500 | -4.49987000 |
| H  | 0.21802600  | 14.66325500 | -2.92697700 |
| O  | 0.79582000  | 9.67291800  | -4.33439500 |
| N  | 2.48374000  | 9.49835900  | 0.16502700  |
| C  | 3.13648800  | 10.16630900 | 1.14783600  |
| O  | 4.36616900  | 10.15398200 | 1.29872400  |
| C  | 4.42992400  | 6.60946700  | -1.73473100 |
| C  | 4.05862700  | 7.15708000  | -3.00188100 |
| C  | 4.48849500  | 8.52890800  | -3.01271800 |
| C  | 5.21461800  | 8.80531400  | -1.77968500 |
| C  | 5.16456600  | 7.62677400  | -0.98142700 |
| C  | 5.93614600  | 10.07260600 | -1.43869100 |
| H  | 5.75811200  | 10.33770100 | -0.39334400 |
| H  | 7.01568300  | 9.94556500  | -1.60043800 |
| H  | 5.60226000  | 10.90342000 | -2.06617400 |
| C  | 5.81211100  | 7.44529700  | 0.35689100  |
| H  | 6.89628600  | 7.30998600  | 0.23907100  |
| H  | 5.62923200  | 8.32524000  | 0.98062900  |
| H  | 5.42213900  | 6.56473300  | 0.87504300  |
| C  | 4.29334100  | 9.48018200  | -4.14894600 |
| H  | 3.33409400  | 9.30866400  | -4.64313600 |
| H  | 4.31788800  | 10.51880000 | -3.81108800 |
| H  | 5.09427600  | 9.34635600  | -4.89030700 |
| C  | 3.34546200  | 6.46197400  | -4.12258900 |
| H  | 2.62093600  | 7.12529200  | -4.60292500 |
| H  | 4.06473100  | 6.13440200  | -4.88545700 |
| H  | 2.79776700  | 5.58467300  | -3.77286700 |
| C  | 4.19772300  | 5.20451300  | -1.27278300 |
| H  | 3.34066100  | 4.75193600  | -1.77618000 |
| H  | 5.08184000  | 4.58829500  | -1.48809800 |
| H  | 4.02190900  | 5.16270200  | -0.19407900 |
| C  | -0.46336800 | 9.06352300  | -3.87120000 |
| H  | -1.13064700 | 9.09076900  | -4.74320800 |

|   |             |             |             |
|---|-------------|-------------|-------------|
| C | -0.27603600 | 7.62684000  | -3.46591800 |
| C | 0.48201900  | 7.25422900  | -2.32055400 |
| C | -0.91918300 | 6.62842300  | -4.20833000 |
| C | 0.52875900  | 5.88797900  | -1.96522500 |
| C | -0.85356500 | 5.28058600  | -3.85472400 |
| H | -1.49180000 | 6.92284100  | -5.08603400 |
| C | -0.12848600 | 4.91731900  | -2.71688400 |
| H | 1.07948200  | 5.62195000  | -1.06685700 |
| H | -1.36716200 | 4.53091000  | -4.44949400 |
| H | -0.08065900 | 3.87493200  | -2.40915300 |
| O | 1.08050900  | 8.17362600  | -1.56380400 |
| H | 1.47011100  | 9.57011100  | 0.18030800  |
| C | -1.01981600 | 10.03375000 | -2.79404500 |
| H | -0.74679500 | 9.69444700  | -1.79009600 |
| H | -2.11146800 | 10.09699600 | -2.85448200 |
| C | 2.27802100  | 10.98919100 | 2.11057100  |
| H | 2.47829200  | 12.05306100 | 1.94000500  |
| H | 1.20307600  | 10.81491700 | 2.00320700  |
| H | 2.57967600  | 10.76120400 | 3.13733200  |

#### TS-5

|    |             |             |             |
|----|-------------|-------------|-------------|
| Rh | 1.16241300  | -0.26713000 | 0.11360000  |
| C  | -4.35194400 | -1.34364200 | -1.26205600 |
| C  | -3.79685700 | -0.21378700 | -0.67313700 |
| C  | -3.51552600 | -0.21098000 | 0.69883700  |
| C  | -3.79170800 | -1.31072300 | 1.50858600  |
| C  | -4.35483100 | -2.44167200 | 0.90278600  |
| C  | -4.63311200 | -2.46571600 | -0.46698300 |
| H  | -4.57473500 | -1.35723400 | -2.32649500 |
| H  | -3.59414800 | -1.27758100 | 2.57515600  |
| H  | -4.58919400 | -3.30894000 | 1.51503800  |
| H  | -5.07834500 | -3.34936400 | -0.91531800 |
| O  | -2.96776100 | 0.95216300  | 1.14156600  |
| N  | 0.04840000  | -1.57066400 | -1.17406300 |
| C  | 0.25556900  | -2.94206700 | -1.26239600 |
| O  | 1.37910600  | -3.43400400 | -1.24530900 |
| C  | 2.84001800  | 0.30646700  | 1.46597300  |
| C  | 1.61830100  | 0.62835000  | 2.12019600  |
| C  | 0.84982400  | -0.59803900 | 2.25839700  |
| C  | 1.67100400  | -1.68656000 | 1.77820500  |
| C  | 2.86690800  | -1.13400500 | 1.22507100  |
| C  | 1.35381100  | -3.14419700 | 1.89492100  |
| H  | 1.70822800  | -3.70507400 | 1.02861600  |
| H  | 1.84325300  | -3.54588600 | 2.79313900  |

|   |             |             |             |
|---|-------------|-------------|-------------|
| H | 0.27968900  | -3.31795500 | 2.00087100  |
| C | 3.99788400  | -1.90023000 | 0.60733200  |
| H | 4.69738100  | -2.25657100 | 1.37657100  |
| H | 3.62216500  | -2.76237400 | 0.05038800  |
| H | 4.55946700  | -1.27176300 | -0.08969200 |
| C | -0.45803600 | -0.70717300 | 2.97970200  |
| H | -1.13089100 | 0.10793200  | 2.70020000  |
| H | -0.96524200 | -1.64696200 | 2.74878700  |
| H | -0.30106900 | -0.66788900 | 4.06701400  |
| C | 1.18309000  | 1.96312700  | 2.63943100  |
| H | 0.11225100  | 2.12342300  | 2.48844000  |
| H | 1.38339300  | 2.01892500  | 3.71864000  |
| H | 1.70732100  | 2.78632700  | 2.15172200  |
| C | 3.93515100  | 1.24894600  | 1.07177000  |
| H | 3.65048800  | 2.28999100  | 1.24129100  |
| H | 4.84356100  | 1.04479500  | 1.65316400  |
| H | 4.17749500  | 1.13365500  | 0.01028700  |
| C | -3.03942100 | 1.93649300  | 0.04287200  |
| H | -3.89643700 | 2.57450200  | 0.29194100  |
| C | -1.80608000 | 2.79325400  | -0.01932500 |
| C | -0.53506300 | 2.23108800  | -0.34507600 |
| C | -1.92252200 | 4.17442800  | 0.16824900  |
| C | 0.55901700  | 3.11710800  | -0.49392500 |
| C | -0.83000300 | 5.03271600  | 0.03785600  |
| H | -2.89945300 | 4.58448700  | 0.41981700  |
| C | 0.41147000  | 4.48872300  | -0.30252400 |
| H | 1.51843900  | 2.69534700  | -0.77815800 |
| H | -0.94750200 | 6.10171800  | 0.18986800  |
| H | 1.27386400  | 5.14073700  | -0.42821800 |
| O | -0.43937400 | 0.92526500  | -0.54616900 |
| H | -0.93302300 | -1.30892600 | -1.07431800 |
| C | -3.36721000 | 1.11636700  | -1.24071500 |
| H | -2.48071700 | 1.01461000  | -1.87379000 |
| H | -4.15072300 | 1.60982200  | -1.82632600 |
| C | -0.99011200 | -3.79941800 | -1.44852700 |
| H | -0.70845700 | -4.85417200 | -1.44848000 |
| H | -1.72713100 | -3.60796500 | -0.66009900 |
| H | -1.47444400 | -3.55794500 | -2.40240900 |
| C | 1.93818400  | 0.30587000  | -2.83510900 |
| O | 0.98104000  | -0.45715600 | -3.21496100 |
| O | 2.28649200  | 0.47441000  | -1.63758700 |
| C | 2.66475000  | 1.06809000  | -3.92027100 |
| H | 3.66110200  | 1.36048400  | -3.58321400 |
| H | 2.72595800  | 0.46783000  | -4.83105200 |

|   |            |             |             |
|---|------------|-------------|-------------|
| H | 2.09416500 | 1.97603500  | -4.14983400 |
| H | 0.51453400 | -0.98085300 | -2.28826400 |

**INT-7**

|    |             |             |             |
|----|-------------|-------------|-------------|
| Rh | -1.15784500 | -0.57966100 | -0.09346300 |
| C  | 4.81575500  | -0.71902000 | 1.10350100  |
| C  | 3.97578900  | 0.22262100  | 0.52152000  |
| C  | 3.53586700  | 0.04378100  | -0.79458300 |
| C  | 3.93558300  | -1.04672600 | -1.56274800 |
| C  | 4.78349600  | -1.98793700 | -0.96576200 |
| C  | 5.22086400  | -1.83358600 | 0.35292900  |
| H  | 5.16328800  | -0.59037700 | 2.12592100  |
| H  | 3.61350000  | -1.14908500 | -2.59414600 |
| H  | 5.11413100  | -2.84581500 | -1.54574100 |
| H  | 5.88791600  | -2.56974300 | 0.79275000  |
| O  | 2.70755000  | 1.03431700  | -1.23073100 |
| C  | -2.52202800 | 0.14903600  | -1.63611700 |
| C  | -1.21949200 | -0.03569100 | -2.25379600 |
| C  | -0.85614300 | -1.40460800 | -2.11351200 |
| C  | -1.96169400 | -2.10307300 | -1.45725200 |
| C  | -2.99370900 | -1.15427300 | -1.19934900 |
| C  | -1.96985400 | -3.56961200 | -1.15211100 |
| H  | -2.81340400 | -3.84304900 | -0.51392200 |
| H  | -2.04133500 | -4.15466400 | -2.07860000 |
| H  | -1.04905400 | -3.86162200 | -0.63722200 |
| C  | -4.33817000 | -1.42155800 | -0.59710000 |
| H  | -5.09503000 | -1.47704800 | -1.39175500 |
| H  | -4.35494000 | -2.36885100 | -0.05203000 |
| H  | -4.61436100 | -0.62107800 | 0.09253800  |
| C  | 0.40461100  | -2.05542000 | -2.58990100 |
| H  | 1.20054000  | -1.32061200 | -2.72269200 |
| H  | 0.75723900  | -2.80366300 | -1.87440800 |
| H  | 0.23716500  | -2.55863100 | -3.55232200 |
| C  | -0.39869000 | 1.03274400  | -2.90722800 |
| H  | -0.66945300 | 2.02500900  | -2.54012300 |
| H  | 0.66916400  | 0.89506000  | -2.72001200 |
| H  | -0.56825400 | 1.01668500  | -3.99266300 |
| C  | -3.34045300 | 1.40190700  | -1.64174300 |
| H  | -2.71030800 | 2.28874100  | -1.73906700 |
| H  | -4.04275900 | 1.38808500  | -2.48750000 |
| H  | -3.89968100 | 1.48915800  | -0.70844700 |
| C  | 2.74925600  | 2.12024400  | -0.23583800 |
| H  | 3.47130300  | 2.84209900  | -0.63820700 |
| C  | 1.42180200  | 2.81762300  | -0.09457500 |



|   |             |             |             |
|---|-------------|-------------|-------------|
| C | 0.24181300  | 2.15222500  | 0.33812600  |
| C | 1.36863700  | 4.19479600  | -0.34729200 |
| C | -0.93613300 | 2.90625600  | 0.51025600  |
| C | 0.19791400  | 4.93303700  | -0.18047500 |
| H | 2.27395100  | 4.69609900  | -0.68520300 |
| C | -0.95566400 | 4.27588300  | 0.25359000  |
| H | -1.83269400 | 2.39250500  | 0.84557600  |
| H | 0.18768200  | 5.99974400  | -0.38555300 |
| H | -1.87950200 | 4.83121300  | 0.39882600  |
| O | 0.26829900  | 0.83199300  | 0.58465500  |
| C | 3.35049800  | 1.48844300  | 1.05266400  |
| H | 2.57997700  | 1.27053800  | 1.79731300  |
| H | 4.07184500  | 2.17114200  | 1.51461700  |
| C | -2.90309300 | 0.21064700  | 2.24379600  |
| O | -1.90010200 | -0.52109600 | 1.86226100  |
| O | -3.59219800 | 0.94586500  | 1.52663700  |
| C | -3.17495100 | 0.10435700  | 3.74407100  |
| H | -4.10017800 | 0.62616900  | 3.99696700  |
| H | -3.23904900 | -0.94493100 | 4.04981700  |
| H | -2.34239400 | 0.55378500  | 4.29725800  |
| C | 0.89991600  | -1.83473300 | 1.93594100  |
| O | 1.06375400  | -0.65612800 | 2.47538800  |
| O | 0.23814100  | -2.05346700 | 0.90740700  |
| C | 1.62353700  | -2.94849800 | 2.64653500  |
| H | 1.23693100  | -3.91715000 | 2.32721400  |
| H | 2.68925400  | -2.88389200 | 2.39742900  |
| H | 1.52334100  | -2.83262700 | 3.72916400  |
| H | 0.66304800  | 0.05650200  | 1.85384200  |

**TS-6**

|    |             |             |             |
|----|-------------|-------------|-------------|
| Rh | -1.80285700 | -0.44661800 | 0.18910300  |
| C  | 4.11850100  | -2.33592500 | 1.25394800  |
| C  | 3.96978600  | -1.10344100 | 0.63052700  |
| C  | 3.92306100  | -1.03391400 | -0.76577600 |
| C  | 4.03453900  | -2.16654700 | -1.56780500 |
| C  | 4.18815600  | -3.40263400 | -0.92632400 |
| C  | 4.22990500  | -3.49312600 | 0.46792000  |
| H  | 4.15146300  | -2.40522200 | 2.33869100  |
| H  | 4.01251600  | -2.08266400 | -2.64989800 |
| H  | 4.28617900  | -4.30316800 | -1.52763800 |
| H  | 4.35650500  | -4.46090600 | 0.94511300  |
| O  | 3.75525100  | 0.23011600  | -1.24367000 |
| C  | -1.84872300 | -0.33154000 | -2.03089800 |
| C  | -1.01606700 | -1.47622400 | -1.63016000 |

|   |             |             |             |
|---|-------------|-------------|-------------|
| C | -1.82274500 | -2.37792100 | -0.88767400 |
| C | -3.14284900 | -1.77868300 | -0.76340200 |
| C | -3.16680900 | -0.55017400 | -1.55519100 |
| C | -4.31499000 | -2.41505300 | -0.08644600 |
| H | -5.02377400 | -1.66720600 | 0.27800600  |
| H | -4.84679000 | -3.06725700 | -0.79374400 |
| H | -3.99625900 | -3.02662800 | 0.76164500  |
| C | -4.36843500 | 0.30005600  | -1.82406600 |
| H | -4.78175900 | 0.05363800  | -2.81182400 |
| H | -5.15422400 | 0.12852200  | -1.08332100 |
| H | -4.10536200 | 1.35885800  | -1.79911200 |
| C | -1.40954900 | -3.66904700 | -0.24816800 |
| H | -0.35272900 | -3.88013200 | -0.42453700 |
| H | -1.56345100 | -3.62929100 | 0.83551600  |
| H | -1.99618600 | -4.50382900 | -0.65104800 |
| C | 0.42233800  | -1.63471600 | -1.99992400 |
| H | 1.00089700  | -0.75834500 | -1.69330700 |
| H | 0.87221700  | -2.51390300 | -1.53494600 |
| H | 0.51115600  | -1.74116300 | -3.08963800 |
| C | -1.37998800 | 0.82600400  | -2.85277400 |
| H | -0.30995300 | 0.99429100  | -2.71399000 |
| H | -1.56278700 | 0.63172000  | -3.91906800 |
| H | -1.90706200 | 1.73615100  | -2.56030500 |
| C | 3.90277200  | 1.15810700  | -0.11618600 |
| H | 4.92785700  | 1.54321500  | -0.18981900 |
| C | 2.95570000  | 2.32334800  | -0.26114900 |
| C | 1.55468700  | 2.16650700  | -0.25707300 |
| C | 3.48012100  | 3.61404800  | -0.40252500 |
| C | 0.72046400  | 3.27939900  | -0.40136900 |
| C | 2.65222000  | 4.72980600  | -0.52882500 |
| H | 4.56064200  | 3.74177700  | -0.41442600 |
| C | 1.26812100  | 4.55688900  | -0.53119900 |
| H | -0.35485400 | 3.12828700  | -0.42199100 |
| H | 3.08554900  | 5.72054800  | -0.63456300 |
| H | 0.60848900  | 5.41409300  | -0.63983500 |
| O | 1.00572500  | 0.90525700  | -0.16974300 |
| C | 3.78580200  | 0.29323500  | 1.17504700  |
| H | 2.81578400  | 0.40543500  | 1.66864700  |
| H | 4.55735100  | 0.58020600  | 1.89822200  |
| C | -2.77824200 | 2.27855800  | 0.80863200  |
| O | -2.43332000 | 1.12534500  | 1.32169200  |
| O | -2.75259100 | 2.57424100  | -0.38883400 |
| C | -3.19377400 | 3.29099600  | 1.86897600  |
| H | -3.61911300 | 4.17849600  | 1.39617400  |

|   |             |             |            |
|---|-------------|-------------|------------|
| H | -3.91454800 | 2.84758800  | 2.56287300 |
| H | -2.31356000 | 3.57986700  | 2.45462100 |
| C | -0.33445900 | -0.69216000 | 2.72190600 |
| O | 0.43779500  | 0.19357400  | 2.31173900 |
| O | -1.25210400 | -1.27318700 | 2.02169800 |
| C | -0.24973500 | -1.16016300 | 4.16590900 |
| H | -0.39584100 | -2.24189000 | 4.23198500 |
| H | 0.71082500  | -0.87785900 | 4.60121600 |
| H | -1.05289600 | -0.68129000 | 4.73833000 |
| H | 0.75738400  | 0.67901700  | 0.77371400 |

**INT-2'**

|    |             |             |             |
|----|-------------|-------------|-------------|
| Rh | 2.76556500  | 8.80567800  | -2.35914600 |
| C  | 3.63770000  | 11.05362400 | -4.35813300 |
| C  | 3.05676000  | 10.68525100 | -3.14357000 |
| C  | 2.68612500  | 11.71006900 | -2.25732500 |
| C  | 2.90742100  | 13.05865400 | -2.55148100 |
| C  | 3.50758400  | 13.39732600 | -3.76513700 |
| C  | 3.86905100  | 12.40065200 | -4.67250500 |
| H  | 3.91060000  | 10.29188100 | -5.08359700 |
| H  | 2.60784500  | 13.81929100 | -1.83618700 |
| H  | 3.68102500  | 14.44383500 | -4.00190600 |
| H  | 4.32188700  | 12.66298800 | -5.62516900 |
| O  | 2.11120700  | 11.40582000 | -1.05553200 |
| N  | 1.78551800  | 10.00573500 | -1.01205200 |
| C  | 1.02284000  | 9.65253300  | 0.04090400  |
| O  | 0.71354300  | 8.45937000  | 0.23688900  |
| C  | 0.53840000  | 10.75732000 | 0.97094700  |
| H  | 1.38245800  | 11.25011700 | 1.46598300  |
| H  | -0.00459900 | 11.53180600 | 0.42027500  |
| H  | -0.11368300 | 10.30361500 | 1.71927000  |
| C  | 3.41118900  | 6.72560900  | -1.39792400 |
| C  | 3.81093500  | 6.73129800  | -2.79104200 |
| C  | 4.73038200  | 7.80564800  | -3.00819800 |
| C  | 4.86635500  | 8.51423600  | -1.75345700 |
| C  | 4.07918800  | 7.80052800  | -0.75900100 |
| C  | 5.84326600  | 9.61797100  | -1.47078800 |
| H  | 6.82453500  | 9.20490100  | -1.19842200 |
| H  | 5.97628100  | 10.26456500 | -2.34150300 |
| H  | 5.50518000  | 10.24808700 | -0.64366800 |
| C  | 4.00868900  | 8.11981600  | 0.70336600  |
| H  | 4.69716600  | 7.46757200  | 1.25872000  |
| H  | 4.29760100  | 9.15426900  | 0.90554000  |
| H  | 2.99829400  | 7.96148900  | 1.08805200  |

|   |             |             |             |
|---|-------------|-------------|-------------|
| C | 5.54268300  | 8.04729600  | -4.24819600 |
| H | 5.81346900  | 9.10131700  | -4.34744200 |
| H | 6.47551500  | 7.46698700  | -4.21386900 |
| H | 5.00372500  | 7.75609400  | -5.15441500 |
| C | 3.47101800  | 5.65316600  | -3.77901200 |
| H | 3.52998800  | 5.99519300  | -4.81408100 |
| H | 4.17729200  | 4.81942100  | -3.66156200 |
| H | 2.46830800  | 5.24888900  | -3.61326000 |
| C | 2.50989300  | 5.73560400  | -0.71798800 |
| H | 1.93350000  | 5.15170900  | -1.44140700 |
| H | 3.08900300  | 5.02460800  | -0.11273600 |
| H | 1.80351400  | 6.25457600  | -0.06343300 |
| C | 0.52632400  | 9.17099900  | -3.61659600 |
| C | 0.52454300  | 9.48090800  | -5.05396400 |
| C | -0.38049700 | 10.46029800 | -5.50581800 |
| C | 1.33830800  | 8.84614000  | -6.01752600 |
| C | -0.53840500 | 10.74275400 | -6.85838700 |
| H | -0.98720300 | 10.98253600 | -4.77012000 |
| C | 1.18905200  | 9.13044900  | -7.37710200 |
| C | 0.24331100  | 10.06212400 | -7.79698700 |
| H | -1.26011700 | 11.48811900 | -7.17841600 |
| H | 1.83534100  | 8.61976700  | -8.08428400 |
| H | 0.13217600  | 10.27266800 | -8.85720800 |
| H | 0.18195100  | 9.98881900  | -2.98986200 |
| O | 2.31395800  | 7.95810900  | -5.66443900 |
| H | 2.54280700  | 8.10964400  | -4.72245500 |
| C | 0.66757200  | 7.94995200  | -2.99660400 |
| H | 0.84411000  | 7.05016400  | -3.57946400 |
| H | 0.33660500  | 7.82461400  | -1.96916200 |

**TS-1'**

|    |            |             |             |
|----|------------|-------------|-------------|
| Rh | 2.77275100 | 8.67824400  | -2.26221800 |
| C  | 3.33286100 | 10.99999900 | -4.37127100 |
| C  | 2.58632800 | 10.61250900 | -3.24073800 |
| C  | 2.37401900 | 11.58913700 | -2.23785800 |
| C  | 2.84515600 | 12.90084900 | -2.37503600 |
| C  | 3.56817200 | 13.24638800 | -3.51276200 |
| C  | 3.83194200 | 12.29222100 | -4.50637200 |
| H  | 3.50739300 | 10.28217700 | -5.16653300 |
| H  | 2.65803100 | 13.61649400 | -1.58027900 |
| H  | 3.93827500 | 14.26237900 | -3.62208000 |
| H  | 4.40578700 | 12.56405900 | -5.38783000 |
| O  | 1.69914400 | 11.27885700 | -1.11193200 |
| N  | 1.77130000 | 9.84773400  | -0.83560700 |

|   |             |             |             |
|---|-------------|-------------|-------------|
| C | 0.90915600  | 9.47954400  | 0.14087500  |
| O | 0.79147100  | 8.28315000  | 0.45285300  |
| C | 0.12263100  | 10.56494100 | 0.86653200  |
| H | 0.78696000  | 11.32005800 | 1.29879900  |
| H | -0.55252400 | 11.08763400 | 0.18004800  |
| H | -0.45725700 | 10.08425800 | 1.65625400  |
| C | 3.51451000  | 6.76529600  | -1.32003500 |
| C | 3.83130000  | 6.69855200  | -2.71586500 |
| C | 4.75767700  | 7.76478700  | -3.01319200 |
| C | 5.06661400  | 8.45898500  | -1.78796400 |
| C | 4.28660700  | 7.85997300  | -0.75585900 |
| C | 6.05129200  | 9.58357100  | -1.64339900 |
| H | 7.08402500  | 9.20899600  | -1.60942800 |
| H | 5.98473100  | 10.28851700 | -2.47877900 |
| H | 5.87744500  | 10.14893000 | -0.72357300 |
| C | 4.27715900  | 8.23231700  | 0.69573000  |
| H | 4.97162400  | 7.58751300  | 1.25249600  |
| H | 4.58645400  | 9.26917900  | 0.85130500  |
| H | 3.27835800  | 8.10548600  | 1.11956500  |
| C | 5.45618300  | 7.98880700  | -4.32467600 |
| H | 5.70510200  | 9.04377300  | -4.47093100 |
| H | 6.39812700  | 7.42280300  | -4.34980700 |
| H | 4.85443900  | 7.66482800  | -5.17759800 |
| C | 3.40004800  | 5.60970400  | -3.65812400 |
| H | 3.39192900  | 5.93514400  | -4.70131000 |
| H | 4.08686000  | 4.75497600  | -3.58521600 |
| H | 2.39821000  | 5.24294500  | -3.41632200 |
| C | 2.68832500  | 5.79006000  | -0.53226400 |
| H | 2.06773700  | 5.17550500  | -1.19118800 |
| H | 3.33250700  | 5.10951400  | 0.04298000  |
| H | 2.02234800  | 6.31543100  | 0.15665700  |
| C | 0.88141500  | 9.63998300  | -3.66436100 |
| C | 0.71884300  | 9.75953400  | -5.13980100 |
| C | -0.17664300 | 10.71883700 | -5.64066500 |
| C | 1.37734600  | 8.92532900  | -6.06701300 |
| C | -0.44933100 | 10.82678100 | -7.00143100 |
| H | -0.67783800 | 11.37876700 | -4.93653600 |
| C | 1.11247400  | 9.03190700  | -7.43522300 |
| C | 0.19684800  | 9.97245500  | -7.89925300 |
| H | -1.15816100 | 11.56820000 | -7.35746800 |
| H | 1.63999700  | 8.36987800  | -8.11495800 |
| H | -0.00547700 | 10.04298600 | -8.96448700 |
| H | 0.31796800  | 10.40293100 | -3.13438200 |
| O | 2.31242600  | 8.00103100  | -5.69114300 |

|   |            |            |             |
|---|------------|------------|-------------|
| H | 2.51001100 | 8.09373600 | -4.73809800 |
| C | 0.83650400 | 8.33511900 | -3.01313200 |
| H | 0.80627800 | 7.46241000 | -3.66496300 |
| H | 0.18668900 | 8.24087000 | -2.14772500 |

### INT-3'

|    |             |             |             |
|----|-------------|-------------|-------------|
| Rh | 2.94775500  | 8.76636300  | -2.04138000 |
| C  | 2.74354600  | 11.76283000 | -4.69778200 |
| C  | 1.94535000  | 11.16714100 | -3.70896500 |
| C  | 2.07503900  | 11.65422700 | -2.39397100 |
| C  | 2.96890700  | 12.67610600 | -2.07009700 |
| C  | 3.76334300  | 13.23933100 | -3.06783900 |
| C  | 3.64695400  | 12.77969100 | -4.38190700 |
| H  | 2.64056700  | 11.44526300 | -5.72993100 |
| H  | 3.01964100  | 13.01608000 | -1.04031700 |
| H  | 4.45899000  | 14.03770400 | -2.82395100 |
| H  | 4.24931800  | 13.22410600 | -5.16974400 |
| O  | 1.24390800  | 11.14073000 | -1.41437200 |
| N  | 1.90453800  | 10.01770900 | -0.76434600 |
| C  | 1.30683700  | 9.72524300  | 0.42181500  |
| O  | 1.61336300  | 8.70074100  | 1.05331400  |
| C  | 0.27230400  | 10.69785300 | 0.96954600  |
| H  | 0.66342700  | 11.71868400 | 1.01180500  |
| H  | -0.61531500 | 10.72356500 | 0.32769300  |
| H  | -0.00849500 | 10.36037700 | 1.96877800  |
| C  | 3.40392900  | 6.82676200  | -1.24802300 |
| C  | 3.69137200  | 6.78590600  | -2.67876300 |
| C  | 4.74874500  | 7.70297900  | -2.90459600 |
| C  | 5.23635100  | 8.18470200  | -1.59916600 |
| C  | 4.45988800  | 7.61447100  | -0.59151000 |
| C  | 6.38400900  | 9.13678900  | -1.44740300 |
| H  | 7.33020200  | 8.65805800  | -1.73416700 |
| H  | 6.25928600  | 10.01534500 | -2.09095100 |
| H  | 6.48360100  | 9.48746400  | -0.41758400 |
| C  | 4.62379900  | 7.75411200  | 0.89189900  |
| H  | 5.04204800  | 6.82947000  | 1.31439600  |
| H  | 5.30649900  | 8.57022500  | 1.14542800  |
| H  | 3.65979900  | 7.95128700  | 1.36470200  |
| C  | 5.46122900  | 7.97597400  | -4.19746600 |
| H  | 5.72608700  | 9.03401600  | -4.29683800 |
| H  | 6.39945400  | 7.40370900  | -4.23306800 |
| H  | 4.86628300  | 7.69613900  | -5.06869700 |
| C  | 3.03883100  | 5.88628700  | -3.68578100 |
| H  | 3.04005100  | 6.32809700  | -4.68575000 |

|   |             |             |             |
|---|-------------|-------------|-------------|
| H | 3.57026400  | 4.92620300  | -3.73748300 |
| H | 2.00007700  | 5.67167300  | -3.41802000 |
| C | 2.40521000  | 5.99219300  | -0.51183700 |
| H | 1.64630200  | 5.58319700  | -1.18455100 |
| H | 2.90691400  | 5.14855100  | -0.01594800 |
| H | 1.91116600  | 6.60028600  | 0.25309300  |
| C | 0.89314300  | 10.07785400 | -3.97610600 |
| C | 0.63452100  | 9.81329600  | -5.45379800 |
| C | -0.56483100 | 10.23084400 | -6.04660400 |
| C | 1.55573800  | 9.12828900  | -6.27091900 |
| C | -0.85166000 | 9.98730100  | -7.38988700 |
| H | -1.28900400 | 10.75932000 | -5.43058700 |
| C | 1.28160400  | 8.87795900  | -7.61834400 |
| C | 0.07956100  | 9.30684200  | -8.17660200 |
| H | -1.79251600 | 10.32395900 | -7.81546800 |
| H | 2.02358200  | 8.34736800  | -8.20755800 |
| H | -0.12726500 | 9.10712000  | -9.22461000 |
| H | -0.03969300 | 10.48666400 | -3.57239000 |
| O | 2.76516700  | 8.68153200  | -5.79821100 |
| H | 2.84178400  | 8.88521900  | -4.84966000 |
| C | 1.18137800  | 8.75662900  | -3.18043900 |
| H | 1.19617500  | 7.89486000  | -3.85313300 |
| H | 0.38799900  | 8.58678300  | -2.44954000 |

#### INT-4a

|    |            |             |             |
|----|------------|-------------|-------------|
| Rh | 2.68784100 | 8.65617600  | -1.93906600 |
| C  | 0.94795500 | 12.07593100 | -4.42709500 |
| C  | 1.04543900 | 11.43449600 | -3.18007300 |
| C  | 1.90477900 | 12.02703100 | -2.23658700 |
| C  | 2.58693200 | 13.21698500 | -2.52222300 |
| C  | 2.44759900 | 13.83471400 | -3.76073400 |
| C  | 1.62973500 | 13.25270500 | -4.73088500 |
| H  | 0.28913300 | 11.63410400 | -5.17154300 |
| H  | 3.22443400 | 13.63996000 | -1.75165000 |
| H  | 2.98065600 | 14.75915500 | -3.96525800 |
| H  | 1.51199400 | 13.71566600 | -5.70645600 |
| O  | 2.13649900 | 11.59081800 | -0.94087900 |
| N  | 1.89267600 | 10.21445400 | -0.67284000 |
| C  | 1.35373400 | 10.07581400 | 0.50818500  |
| O  | 1.08046000 | 8.88206200  | 0.97856800  |
| C  | 4.58650200 | 7.31670200  | -1.64118600 |
| C  | 3.99827000 | 7.25168100  | -2.98513500 |
| C  | 4.19376000 | 8.53343500  | -3.60837300 |
| C  | 4.71667700 | 9.41584700  | -2.61223800 |

|   |             |             |             |
|---|-------------|-------------|-------------|
| C | 5.01657600  | 8.63130500  | -1.41186500 |
| C | 5.16275000  | 10.83155500 | -2.82814000 |
| H | 6.23101900  | 10.86005600 | -3.08787500 |
| H | 4.60720600  | 11.31564100 | -3.63437000 |
| H | 5.02682500  | 11.43494100 | -1.92620100 |
| C | 5.66534700  | 9.18911100  | -0.17801100 |
| H | 6.73401800  | 9.38283000  | -0.34497700 |
| H | 5.20715200  | 10.13860800 | 0.11952400  |
| H | 5.58158900  | 8.50195200  | 0.66836200  |
| C | 3.93452800  | 8.87812800  | -5.04476700 |
| H | 3.57370400  | 9.90498800  | -5.15633400 |
| H | 4.85761200  | 8.78108500  | -5.63291200 |
| H | 3.19163500  | 8.21145900  | -5.49197300 |
| C | 3.53497600  | 5.98800400  | -3.65093200 |
| H | 2.84285500  | 6.19749800  | -4.47131000 |
| H | 4.38242000  | 5.42114400  | -4.06244600 |
| H | 3.01206000  | 5.33953300  | -2.94199300 |
| C | 4.60256300  | 6.15840500  | -0.68955500 |
| H | 3.58107800  | 5.80546300  | -0.50324800 |
| H | 5.17781400  | 5.31971600  | -1.10234100 |
| H | 5.04669500  | 6.42870400  | 0.27232300  |
| C | 1.00022700  | 8.86423100  | -3.17325400 |
| H | 1.35250800  | 8.85827300  | -4.21221900 |
| C | 0.12189300  | 7.65986900  | -2.89602800 |
| C | 0.35137300  | 6.95158200  | -1.70321900 |
| C | -0.92312900 | 7.25254900  | -3.73317100 |
| C | -0.47822200 | 5.88050100  | -1.34049900 |
| C | -1.74471300 | 6.17570800  | -3.38735900 |
| H | -1.09773700 | 7.78740100  | -4.66576500 |
| C | -1.52226700 | 5.49967800  | -2.18421500 |
| H | -0.28101600 | 5.35050000  | -0.41242500 |
| H | -2.55031900 | 5.86880000  | -4.04896300 |
| H | -2.15765100 | 4.66240900  | -1.90516100 |
| O | 1.41489000  | 7.30314300  | -0.93735400 |
| H | 1.19523700  | 8.15074100  | 0.23958700  |
| C | 0.22798100  | 10.18020600 | -2.94500500 |
| H | -0.21107000 | 10.17905500 | -1.94397300 |
| H | -0.62474100 | 10.20472400 | -3.64096100 |
| C | 1.01293800  | 11.22891300 | 1.41017300  |
| H | 1.91076200  | 11.79796600 | 1.67032200  |
| H | 0.32981900  | 11.91903000 | 0.90595000  |
| H | 0.54572000  | 10.84009900 | 2.31603400  |

TS-2a



|    |             |             |             |
|----|-------------|-------------|-------------|
| Rh | 2.57865400  | 8.23008000  | -1.80692500 |
| C  | 0.50828600  | 12.59496200 | -3.75704600 |
| C  | 1.09488300  | 11.67538600 | -2.88536300 |
| C  | 2.26089900  | 12.09094100 | -2.13446400 |
| C  | 2.66637700  | 13.46531500 | -2.21493300 |
| C  | 2.06378100  | 14.33900400 | -3.10054800 |
| C  | 0.98517000  | 13.90241000 | -3.88831500 |
| H  | -0.36497200 | 12.28837000 | -4.33006400 |
| H  | 3.51473100  | 13.76392500 | -1.60576300 |
| H  | 2.42102800  | 15.36216200 | -3.18856100 |
| H  | 0.50117300  | 14.58775600 | -4.57866500 |
| O  | 2.97621900  | 11.25286700 | -1.47043700 |
| N  | 2.18207800  | 9.45469800  | -0.34998500 |
| C  | 1.40684800  | 9.48202600  | 0.66558200  |
| O  | 0.77084100  | 8.38191100  | 1.10461300  |
| C  | 4.50466400  | 6.95081600  | -1.31066600 |
| C  | 3.80847300  | 6.40534400  | -2.46259200 |
| C  | 3.84527800  | 7.36324700  | -3.52278700 |
| C  | 4.47355500  | 8.55155900  | -3.00528100 |
| C  | 4.89816800  | 8.27488100  | -1.64176200 |
| C  | 4.81887700  | 9.77928200  | -3.79456600 |
| H  | 5.71689800  | 9.60630100  | -4.40509800 |
| H  | 4.00975700  | 10.06387200 | -4.47517000 |
| H  | 5.00539900  | 10.63040000 | -3.13764100 |
| C  | 5.63914000  | 9.24559800  | -0.77069600 |
| H  | 6.67503200  | 9.36148100  | -1.11692800 |
| H  | 5.15589700  | 10.22658300 | -0.79224700 |
| H  | 5.67129800  | 8.90637100  | 0.26801400  |
| C  | 3.39297200  | 7.14689500  | -4.93758600 |
| H  | 3.15358500  | 8.09369100  | -5.43046900 |
| H  | 4.18419600  | 6.66406400  | -5.52744600 |
| H  | 2.50317700  | 6.51303000  | -4.99058600 |
| C  | 3.21049900  | 5.03222900  | -2.51711100 |
| H  | 2.61811000  | 4.88681100  | -3.42341100 |
| H  | 3.99680500  | 4.26608600  | -2.49704700 |
| H  | 2.55022100  | 4.86511100  | -1.65973700 |
| C  | 4.76918800  | 6.20551400  | -0.03477500 |
| H  | 3.92696500  | 5.55852200  | 0.23097400  |
| H  | 5.65689700  | 5.56363400  | -0.12735200 |
| H  | 4.94226300  | 6.88631900  | 0.80338700  |
| C  | 1.11204300  | 9.01847700  | -3.10227700 |
| H  | 1.59303900  | 9.19966500  | -4.07041400 |
| C  | 0.08102100  | 7.91259900  | -3.20197000 |
| C  | 0.01071900  | 6.99976100  | -2.13175600 |

|   |             |             |             |
|---|-------------|-------------|-------------|
| C | -0.83769200 | 7.80294700  | -4.25239000 |
| C | -1.00771200 | 6.03405800  | -2.09464500 |
| C | -1.83652300 | 6.82573200  | -4.23444600 |
| H | -0.77558300 | 8.49936600  | -5.08742600 |
| C | -1.92234600 | 5.95327200  | -3.14490300 |
| H | -1.05050400 | 5.34478000  | -1.25563400 |
| H | -2.54122700 | 6.74858700  | -5.05775300 |
| H | -2.69869100 | 5.19222300  | -3.11868500 |
| O | 0.96463900  | 7.04324400  | -1.17637900 |
| H | 0.78295100  | 7.71720800  | 0.34716900  |
| C | 0.42945100  | 10.35146900 | -2.62923200 |
| H | 0.20319300  | 10.25879900 | -1.56300600 |
| H | -0.54003400 | 10.37697200 | -3.14677500 |
| C | 1.15860500  | 10.72049300 | 1.47975300  |
| H | 1.39184900  | 10.51581500 | 2.53079200  |
| H | 1.77352700  | 11.54240800 | 1.11317300  |
| H | 0.09830300  | 10.99161400 | 1.42284500  |

#### INT-5a

|    |             |             |             |
|----|-------------|-------------|-------------|
| Rh | 2.31481500  | 8.67015800  | -1.87840100 |
| C  | 0.88902800  | 12.91464100 | -3.83058200 |
| C  | 1.19895800  | 11.82432300 | -3.01803600 |
| C  | 2.48103300  | 11.73358300 | -2.42249500 |
| C  | 3.40800700  | 12.77461800 | -2.65904900 |
| C  | 3.06580100  | 13.86949500 | -3.45212300 |
| C  | 1.80804600  | 13.94430600 | -4.05286000 |
| H  | -0.09889200 | 12.96594600 | -4.28540700 |
| H  | 4.38037000  | 12.73025200 | -2.17738500 |
| H  | 3.79055300  | 14.66671600 | -3.60149900 |
| H  | 1.54275900  | 14.79126700 | -4.67924200 |
| O  | 2.78769700  | 10.72755500 | -1.60423200 |
| N  | 1.33645300  | 9.08164500  | -0.15398300 |
| C  | 1.09367600  | 8.20814300  | 0.74100300  |
| O  | 1.25903200  | 6.85744100  | 0.66329400  |
| C  | 4.57578400  | 7.75886200  | -1.08784400 |
| C  | 3.88188700  | 6.86115100  | -1.94179200 |
| C  | 3.79510600  | 7.45241500  | -3.29660100 |
| C  | 4.41691400  | 8.69739700  | -3.24176000 |
| C  | 4.91488100  | 8.88593000  | -1.86661000 |
| C  | 4.66314500  | 9.65863300  | -4.36309700 |
| H  | 5.72591100  | 9.66221000  | -4.64275700 |
| H  | 4.09077500  | 9.38902700  | -5.25477900 |
| H  | 4.39203000  | 10.68206200 | -4.08440200 |
| C  | 5.61423500  | 10.09618900 | -1.38524100 |

|   |             |             |             |
|---|-------------|-------------|-------------|
| H | 6.20301300  | 10.57407200 | -2.17399300 |
| H | 4.81943600  | 10.80301100 | -1.08342900 |
| H | 6.25671600  | 9.89183700  | -0.52476100 |
| C | 3.25411000  | 6.72655700  | -4.49030300 |
| H | 3.08421800  | 7.40404800  | -5.33141600 |
| H | 3.95790200  | 5.95197600  | -4.82528400 |
| H | 2.30715300  | 6.23227900  | -4.25385000 |
| C | 3.52918800  | 5.45013200  | -1.62463700 |
| H | 2.53902500  | 5.20329800  | -2.01590000 |
| H | 4.25879800  | 4.78211500  | -2.10536200 |
| H | 3.54427000  | 5.25698700  | -0.54957800 |
| C | 4.89687900  | 7.52848200  | 0.36275300  |
| H | 4.06617000  | 7.03162800  | 0.87269700  |
| H | 5.79054600  | 6.90125700  | 0.48274200  |
| H | 5.08048300  | 8.47283400  | 0.88179600  |
| C | 0.77614500  | 9.33824500  | -3.17252600 |
| H | 1.34381300  | 9.42361700  | -4.11016600 |
| C | -0.28060800 | 8.26493200  | -3.25862200 |
| C | -0.01175200 | 7.06334200  | -2.59966200 |
| C | -1.48197200 | 8.39578800  | -3.96543800 |
| C | -0.92462200 | 5.99900900  | -2.63452900 |
| C | -2.39817100 | 7.34254100  | -4.01316800 |
| H | -1.70174700 | 9.32168800  | -4.49120300 |
| C | -2.11604700 | 6.14859700  | -3.34292500 |
| H | -0.69251400 | 5.07843100  | -2.10622300 |
| H | -3.32647700 | 7.45534600  | -4.56578000 |
| H | -2.82853500 | 5.32794800  | -3.36885900 |
| O | 1.16387700  | 6.94491700  | -1.94484700 |
| H | 1.25011000  | 6.65275000  | -0.30881100 |
| C | 0.23612400  | 10.70737400 | -2.74778900 |
| H | -0.03027800 | 10.65712400 | -1.68429900 |
| H | -0.69352400 | 10.89323200 | -3.30398500 |
| C | 0.56065300  | 8.63887200  | 2.08784000  |
| H | 1.22556400  | 8.27044800  | 2.87829100  |
| H | 0.49461600  | 9.72606900  | 2.14227500  |
| H | -0.42822500 | 8.19669400  | 2.25491800  |

**INT-6a**

|    |            |             |             |
|----|------------|-------------|-------------|
| Rh | 2.32773200 | 8.71109600  | -2.36320300 |
| C  | 0.95166800 | 12.81658200 | -4.47254100 |
| C  | 1.16288800 | 11.98155900 | -3.36035000 |
| C  | 2.23616300 | 12.32032700 | -2.51510400 |
| C  | 3.03435700 | 13.44441100 | -2.78377000 |
| C  | 2.78651000 | 14.25146900 | -3.88726100 |

|   |             |             |             |
|---|-------------|-------------|-------------|
| C | 1.73442000  | 13.93435400 | -4.74863300 |
| H | 0.12433600  | 12.57136700 | -5.13531100 |
| H | 3.84641500  | 13.66541500 | -2.09725500 |
| H | 3.41393400  | 15.11937900 | -4.07196300 |
| H | 1.52228800  | 14.55018300 | -5.61797100 |
| O | 2.63307900  | 11.68022500 | -1.36181600 |
| N | 2.11665100  | 10.37890900 | -1.09069700 |
| C | 1.92553800  | 10.20294900 | 0.21746100  |
| O | 1.77293600  | 9.02723800  | 0.66213100  |
| C | 3.86187600  | 6.96601800  | -1.82705100 |
| C | 3.23001400  | 6.81073200  | -3.14737300 |
| C | 3.64054600  | 7.89834500  | -3.96930600 |
| C | 4.35057600  | 8.83066100  | -3.12032800 |
| C | 4.55751000  | 8.17781400  | -1.81669900 |
| C | 5.05721600  | 10.07746500 | -3.56578400 |
| H | 6.09983600  | 9.85871800  | -3.83815800 |
| H | 4.57043000  | 10.52821300 | -4.43458400 |
| H | 5.06833200  | 10.82905700 | -2.77194100 |
| C | 5.33796900  | 8.77997300  | -0.68648300 |
| H | 6.41692300  | 8.63000400  | -0.83103300 |
| H | 5.16345800  | 9.85819100  | -0.62026100 |
| H | 5.06039300  | 8.34034700  | 0.27474000  |
| C | 3.40186100  | 8.04011800  | -5.44282500 |
| H | 3.42615300  | 9.08702700  | -5.75794500 |
| H | 4.18193300  | 7.50868300  | -6.00515000 |
| H | 2.43593400  | 7.62068700  | -5.74033400 |
| C | 2.47300100  | 5.59250600  | -3.59083600 |
| H | 1.79374800  | 5.81999800  | -4.41680600 |
| H | 3.16276500  | 4.80530300  | -3.92720800 |
| H | 1.87333100  | 5.17611300  | -2.77593900 |
| C | 3.70337300  | 5.98528400  | -0.70337600 |
| H | 2.64640400  | 5.78167100  | -0.49766100 |
| H | 4.18222500  | 5.02775500  | -0.94918500 |
| H | 4.15080900  | 6.35857600  | 0.22066400  |
| C | 0.86212700  | 9.46470400  | -3.68264300 |
| H | 1.30769000  | 9.63228600  | -4.66886100 |
| C | -0.17455300 | 8.36736200  | -3.75557900 |
| C | -0.44705300 | 7.65128500  | -2.57863300 |
| C | -0.91190900 | 8.04221300  | -4.89765700 |
| C | -1.43087100 | 6.67024700  | -2.50763000 |
| C | -1.89790900 | 7.04721900  | -4.85934200 |
| H | -0.71855200 | 8.57943800  | -5.82408000 |
| C | -2.15899200 | 6.37316000  | -3.66655700 |
| H | -1.60396500 | 6.14167700  | -1.57515200 |

|   |             |             |             |
|---|-------------|-------------|-------------|
| H | -2.45889100 | 6.80492900  | -5.75780900 |
| H | -2.92343100 | 5.60138600  | -3.63154400 |
| O | 0.37476300  | 7.99410100  | -1.52998100 |
| H | 0.82959900  | 8.41142200  | 1.68063600  |
| C | 0.24373600  | 10.78865000 | -3.18890100 |
| H | -0.08679700 | 10.67841200 | -2.15331100 |
| H | -0.66211200 | 10.98581700 | -3.78264100 |
| C | 1.91516100  | 11.39244300 | 1.15995800  |
| H | 1.45939000  | 11.08421700 | 2.10373700  |
| H | 2.93979400  | 11.72710100 | 1.36028000  |
| H | 1.37345400  | 12.24322900 | 0.73931000  |
| C | -0.30455700 | 6.83087000  | 1.79854900  |
| O | 0.24201000  | 7.89046400  | 2.34740200  |
| O | -0.20460900 | 6.51272600  | 0.60891900  |
| H | 0.24614400  | 7.46977400  | -0.68858300 |
| C | -1.09333700 | 5.99546000  | 2.78054500  |
| H | -1.86003000 | 6.61292800  | 3.25982900  |
| H | -1.55783700 | 5.15186500  | 2.26896600  |
| H | -0.42946000 | 5.63187800  | 3.57216100  |

**TS-3a**

|    |             |             |             |
|----|-------------|-------------|-------------|
| Rh | 2.08664000  | 8.52672400  | -2.08776000 |
| C  | 0.96020000  | 13.19962700 | -4.27520600 |
| C  | 1.42002100  | 12.21767300 | -3.39513600 |
| C  | 2.77233700  | 12.30094100 | -2.87502300 |
| C  | 3.56274900  | 13.44306100 | -3.25251300 |
| C  | 3.07025700  | 14.39415800 | -4.12296000 |
| C  | 1.76551000  | 14.27756200 | -4.64546500 |
| H  | -0.05536100 | 13.13014900 | -4.66205700 |
| H  | 4.56655200  | 13.51142000 | -2.84165600 |
| H  | 3.68899300  | 15.24127100 | -4.41111200 |
| H  | 1.38236300  | 15.03507100 | -5.32377100 |
| O  | 3.23051100  | 11.36600800 | -2.13671500 |
| N  | 1.96296500  | 9.71389500  | -0.57255400 |
| C  | 2.05923200  | 9.66599800  | 0.72099800  |
| O  | 2.07059200  | 8.57225400  | 1.39983000  |
| C  | 3.57661000  | 6.82535500  | -1.47281600 |
| C  | 2.82781800  | 6.40028900  | -2.63716900 |
| C  | 3.12185700  | 7.27481900  | -3.73311600 |
| C  | 3.98512400  | 8.31141300  | -3.23284500 |
| C  | 4.26525700  | 8.02120300  | -1.83040700 |
| C  | 4.66933700  | 9.36429800  | -4.04898900 |
| H  | 5.59016900  | 8.95476800  | -4.48912300 |
| H  | 4.03948100  | 9.71460300  | -4.87230000 |

|   |             |             |             |
|---|-------------|-------------|-------------|
| H | 4.92017500  | 10.23044800 | -3.43622200 |
| C | 5.17854300  | 8.82652800  | -0.95723900 |
| H | 6.22754400  | 8.59732400  | -1.19084000 |
| H | 5.01169600  | 9.89560300  | -1.11514000 |
| H | 5.00933200  | 8.60368400  | 0.09914800  |
| C | 2.68355500  | 7.09717300  | -5.15724300 |
| H | 2.68540700  | 8.04815500  | -5.69757700 |
| H | 3.36285100  | 6.41762500  | -5.69000900 |
| H | 1.67508200  | 6.67987100  | -5.22670000 |
| C | 1.93701300  | 5.19519500  | -2.69422100 |
| H | 1.21712200  | 5.26753200  | -3.51376100 |
| H | 2.53553700  | 4.28785200  | -2.85425200 |
| H | 1.37663200  | 5.06527700  | -1.76380400 |
| C | 3.64048200  | 6.11983200  | -0.14936100 |
| H | 2.84662000  | 5.37255600  | -0.06434500 |
| H | 4.59964600  | 5.59641700  | -0.03405200 |
| H | 3.51891800  | 6.82462300  | 0.67733200  |
| C | 0.96695600  | 9.68392000  | -3.49338000 |
| H | 1.59052300  | 9.81476200  | -4.38141300 |
| C | -0.23209700 | 8.81974500  | -3.80186200 |
| C | -0.73356000 | 8.00891000  | -2.77288100 |
| C | -0.89868900 | 8.79150400  | -5.03116400 |
| C | -1.85892200 | 7.20725500  | -2.92544700 |
| C | -2.03214400 | 7.98997400  | -5.21504500 |
| H | -0.53006700 | 9.40702500  | -5.84854400 |
| C | -2.50895900 | 7.20426800  | -4.16538400 |
| H | -2.20061500 | 6.58679600  | -2.10223600 |
| H | -2.53556800 | 7.97773400  | -6.17759700 |
| H | -3.38415100 | 6.57608800  | -4.30670300 |
| O | -0.00274200 | 8.07450900  | -1.60225700 |
| H | 0.96328600  | 7.58673700  | 1.62191200  |
| C | 0.55666600  | 11.09736100 | -2.92075700 |
| H | 0.56846000  | 11.04233300 | -1.82715100 |
| H | -0.47562600 | 11.28621000 | -3.24605900 |
| C | 2.15471400  | 10.99069500 | 1.45928600  |
| H | 1.27692900  | 11.10695800 | 2.10549500  |
| H | 3.04137200  | 10.96651200 | 2.10270700  |
| H | 2.22376100  | 11.83387500 | 0.76937800  |
| C | -0.32497100 | 6.08087400  | 1.29811600  |
| O | 0.32777400  | 6.89617200  | 2.07635800  |
| O | -0.34829300 | 6.11517700  | 0.05763600  |
| H | -0.14853700 | 7.32041700  | -0.94799300 |
| C | -1.09504600 | 5.02546800  | 2.05969400  |
| H | -0.40268900 | 4.42000100  | 2.65397200  |

|   |             |            |            |
|---|-------------|------------|------------|
| H | -1.78368900 | 5.50817300 | 2.76078000 |
| H | -1.64941600 | 4.38885200 | 1.36937000 |

**TS-2b**

|    |             |             |             |
|----|-------------|-------------|-------------|
| Rh | -1.00254100 | -0.36608200 | -0.16919100 |
| C  | 2.90692500  | -2.36908400 | -1.37784100 |
| C  | 1.94760000  | -1.69719500 | -0.59912300 |
| C  | 2.08655600  | -1.75986400 | 0.80366700  |
| C  | 3.16289800  | -2.45589600 | 1.37409800  |
| C  | 4.10489700  | -3.09361100 | 0.57642500  |
| C  | 3.98020900  | -3.05158000 | -0.81496100 |
| H  | 2.79642900  | -2.34549200 | -2.46017700 |
| H  | 3.23057500  | -2.48375200 | 2.45707800  |
| H  | 4.93368100  | -3.62143500 | 1.04005800  |
| H  | 4.70436500  | -3.54999300 | -1.45240800 |
| O  | 1.18538800  | -1.28908100 | 1.72708200  |
| N  | 0.42053400  | -0.14435600 | 1.34360700  |
| C  | 0.50894700  | 0.85222000  | 2.23717800  |
| O  | -0.16178200 | 1.90131800  | 2.08482100  |
| C  | -2.89039600 | 0.94487500  | 0.27101900  |
| C  | -2.86807700 | 0.68637600  | -1.12429600 |
| C  | -2.89967300 | -0.74487100 | -1.31463500 |
| C  | -3.05779400 | -1.36977200 | -0.01340900 |
| C  | -2.98561500 | -0.33882700 | 0.96153100  |
| C  | -3.30614900 | -2.83002900 | 0.24148800  |
| H  | -4.38308600 | -3.04899500 | 0.21910600  |
| H  | -2.82892800 | -3.46310500 | -0.51235300 |
| H  | -2.92786700 | -3.13776800 | 1.22032900  |
| C  | -3.11246300 | -0.49100000 | 2.44882400  |
| H  | -4.14735600 | -0.30838500 | 2.77066700  |
| H  | -2.83375000 | -1.49610000 | 2.77755400  |
| H  | -2.47244900 | 0.22670000  | 2.96956200  |
| C  | -3.00077700 | -1.45513800 | -2.63584600 |
| H  | -2.44939700 | -0.93049700 | -3.42227700 |
| H  | -2.60764400 | -2.47485300 | -2.57657300 |
| H  | -4.04696600 | -1.52667900 | -2.96460000 |
| C  | -2.81640000 | 1.72876800  | -2.20277900 |
| H  | -2.51078900 | 1.30195700  | -3.16307900 |
| H  | -3.80566900 | 2.18323900  | -2.34998800 |
| H  | -2.11055000 | 2.52279700  | -1.94166100 |
| C  | -3.02948500 | 2.28486300  | 0.92857500  |
| H  | -2.69258700 | 3.08921400  | 0.27027700  |
| H  | -4.08451000 | 2.47235000  | 1.17674100  |
| H  | -2.44279300 | 2.34025700  | 1.84770900  |

|   |             |             |             |
|---|-------------|-------------|-------------|
| C | 0.59678700  | 0.37429200  | -1.46017700 |
| H | -0.00015600 | 0.65350400  | -2.32956700 |
| C | 1.58745200  | 1.43090700  | -1.09967900 |
| C | 1.16899100  | 2.71189100  | -0.67490100 |
| C | 2.95868400  | 1.24301400  | -1.35202800 |
| C | 2.09280400  | 3.75163600  | -0.53613400 |
| C | 3.88010900  | 2.27900300  | -1.20335900 |
| H | 3.30702900  | 0.27557100  | -1.69514400 |
| C | 3.44470000  | 3.54256200  | -0.80191600 |
| H | 1.72246800  | 4.71667200  | -0.20382000 |
| H | 4.93068800  | 2.09940600  | -1.41542100 |
| H | 4.15336100  | 4.35896000  | -0.68799000 |
| O | -0.14867300 | 2.96445600  | -0.39183800 |
| H | -0.33833800 | 2.51251100  | 0.47765500  |
| C | 0.80391600  | -1.05348700 | -1.33274600 |
| H | 0.51574500  | -1.62611800 | -2.21524800 |
| H | -0.24876500 | -1.75953000 | -0.45990000 |
| C | 1.43571400  | 0.70973000  | 3.43331300  |
| H | 1.16787100  | -0.15832800 | 4.04420700  |
| H | 2.47226100  | 0.57190900  | 3.10912900  |
| H | 1.35793900  | 1.62104900  | 4.02831500  |

**INT-4b**

|    |             |             |             |
|----|-------------|-------------|-------------|
| Rh | -0.94627600 | -0.48981500 | -0.04695700 |
| C  | 2.72311600  | -2.52565600 | -1.43892000 |
| C  | 1.89800600  | -1.70806000 | -0.63903500 |
| C  | 2.16744800  | -1.68706000 | 0.74808900  |
| C  | 3.23252500  | -2.44017000 | 1.27074600  |
| C  | 4.03612100  | -3.21729300 | 0.44866100  |
| C  | 3.78073200  | -3.26624500 | -0.92508600 |
| H  | 2.51452700  | -2.56329800 | -2.50617600 |
| H  | 3.39973300  | -2.39839400 | 2.34253000  |
| H  | 4.85559100  | -3.78585900 | 0.87968700  |
| H  | 4.39262300  | -3.87553100 | -1.58359600 |
| O  | 1.43834500  | -1.07266800 | 1.73324700  |
| N  | 0.52622300  | -0.05272100 | 1.35070200  |
| C  | 0.53868200  | 0.97901200  | 2.20541700  |
| O  | -0.25120100 | 1.94321100  | 2.04431300  |
| C  | -2.93606100 | 0.91231600  | 0.28517100  |
| C  | -2.81194400 | 0.67901400  | -1.09948500 |
| C  | -2.79003700 | -0.76115200 | -1.32248800 |
| C  | -2.98831900 | -1.40304400 | -0.05433700 |
| C  | -2.96981400 | -0.37469800 | 0.95677600  |
| C  | -3.28706800 | -2.85979200 | 0.16909100  |



|   |             |             |             |
|---|-------------|-------------|-------------|
| H | -4.37004800 | -3.03367600 | 0.09807800  |
| H | -2.80045500 | -3.49663900 | -0.57447300 |
| H | -2.96229000 | -3.19326600 | 1.15800600  |
| C | -3.18945600 | -0.55903800 | 2.42997100  |
| H | -4.24853600 | -0.42097200 | 2.69033700  |
| H | -2.89211400 | -1.55818000 | 2.76042400  |
| H | -2.60872300 | 0.17196200  | 3.00006800  |
| C | -2.82484300 | -1.43694600 | -2.66460600 |
| H | -2.18916100 | -0.92544700 | -3.39477800 |
| H | -2.48403000 | -2.47436700 | -2.59851500 |
| H | -3.84398500 | -1.44891500 | -3.07596100 |
| C | -2.75091100 | 1.73239000  | -2.16641000 |
| H | -2.41519200 | 1.31848400  | -3.12241900 |
| H | -3.74408600 | 2.17020200  | -2.33628900 |
| H | -2.06564500 | 2.53697900  | -1.88241400 |
| C | -3.11804700 | 2.23800200  | 0.96010500  |
| H | -2.83031000 | 3.06357500  | 0.30421000  |
| H | -4.17363300 | 2.37914300  | 1.23375800  |
| H | -2.51346600 | 2.30663000  | 1.86705000  |
| C | 0.64180300  | 0.39003100  | -1.48473300 |
| H | -0.07362600 | 0.71880000  | -2.23633200 |
| C | 1.60736300  | 1.44258300  | -1.08704600 |
| C | 1.16508900  | 2.71955300  | -0.67579800 |
| C | 2.98780800  | 1.24930500  | -1.27949700 |
| C | 2.07899800  | 3.76158200  | -0.49853900 |
| C | 3.89740000  | 2.28881400  | -1.09408200 |
| H | 3.34578600  | 0.27914900  | -1.60617800 |
| C | 3.44079000  | 3.55166100  | -0.71047800 |
| H | 1.69647600  | 4.72613900  | -0.17920100 |
| H | 4.95657100  | 2.11454900  | -1.26233000 |
| H | 4.14334200  | 4.36870000  | -0.56735900 |
| O | -0.16460900 | 2.95057500  | -0.43759200 |
| H | -0.36987100 | 2.53464200  | 0.44926200  |
| C | 0.79353200  | -0.99859700 | -1.35013600 |
| H | 0.33307600  | -1.60742600 | -2.12596400 |
| H | -0.55747400 | -1.95147500 | 0.32592800  |
| C | 1.52485600  | 0.98653700  | 3.36027900  |
| H | 1.38768200  | 0.11301100  | 4.00570100  |
| H | 2.55521400  | 0.95856400  | 2.99183100  |
| H | 1.36507000  | 1.90158900  | 3.93272400  |

**TS-3b**

|    |             |             |             |
|----|-------------|-------------|-------------|
| Rh | -0.89093700 | -0.32857300 | -0.01536600 |
| C  | 2.47849800  | -2.91745500 | -0.68549000 |

|   |             |             |             |
|---|-------------|-------------|-------------|
| C | 1.89997500  | -1.68210200 | -0.35059500 |
| C | 2.42587200  | -1.01115500 | 0.77408700  |
| C | 3.50299500  | -1.52706600 | 1.49143100  |
| C | 4.08112900  | -2.73968000 | 1.11189000  |
| C | 3.55756200  | -3.44212200 | 0.02611500  |
| H | 2.08095700  | -3.46296800 | -1.53847400 |
| H | 3.87830900  | -0.96369900 | 2.33984100  |
| H | 4.92402000  | -3.13591100 | 1.67092500  |
| H | 3.98834200  | -4.39428600 | -0.27043700 |
| O | 1.93914600  | 0.22435200  | 1.16378700  |
| N | 0.54523100  | 0.22106000  | 1.50752600  |
| C | 0.28098600  | 0.75056300  | 2.74657400  |
| O | -0.87752000 | 0.81842200  | 3.15769600  |
| C | -3.06101900 | 0.65645400  | 0.41486800  |
| C | -2.88354000 | 0.63280300  | -0.98072100 |
| C | -2.62105900 | -0.75324400 | -1.36117300 |
| C | -2.79271000 | -1.58865900 | -0.19846400 |
| C | -2.97565800 | -0.71717800 | 0.91469700  |
| C | -2.83831000 | -3.09053000 | -0.18778700 |
| H | -3.85428100 | -3.45189000 | -0.40326400 |
| H | -2.17294700 | -3.52504600 | -0.94031400 |
| H | -2.54468800 | -3.49598200 | 0.78435400  |
| C | -3.28994000 | -1.12489200 | 2.32567900  |
| H | -4.37498500 | -1.08800300 | 2.50026500  |
| H | -2.95830500 | -2.14741900 | 2.52961300  |
| H | -2.79916300 | -0.46138400 | 3.03921200  |
| C | -2.52055200 | -1.25080800 | -2.77557100 |
| H | -1.96268400 | -0.56240700 | -3.41829300 |
| H | -2.03369200 | -2.22917600 | -2.82781500 |
| H | -3.52172500 | -1.35986600 | -3.21507500 |
| C | -2.98775900 | 1.79174800  | -1.93147200 |
| H | -2.38879900 | 1.63065800  | -2.83315500 |
| H | -4.02765400 | 1.93662400  | -2.25718100 |
| H | -2.64677300 | 2.72804400  | -1.48108800 |
| C | -3.36840800 | 1.85101100  | 1.26950400  |
| H | -3.14632200 | 2.78694700  | 0.74823100  |
| H | -4.43435500 | 1.86719300  | 1.53829800  |
| H | -2.78533700 | 1.82463400  | 2.19308600  |
| C | 0.58501700  | 0.18510700  | -1.57406700 |
| H | -0.08612700 | 0.30620900  | -2.42538400 |
| C | 1.58035300  | 1.29148500  | -1.47201500 |
| C | 1.20042900  | 2.59710000  | -1.09712100 |
| C | 2.90384400  | 1.08640800  | -1.89349800 |
| C | 2.11580200  | 3.65219000  | -1.15997000 |

|   |             |             |             |
|---|-------------|-------------|-------------|
| C | 3.82125100  | 2.13378100  | -1.95535700 |
| H | 3.20583100  | 0.08695500  | -2.19352800 |
| C | 3.41942800  | 3.42178400  | -1.59214700 |
| H | 1.78459700  | 4.64113900  | -0.85789400 |
| H | 4.83660500  | 1.94738100  | -2.29351800 |
| H | 4.12325500  | 4.24879700  | -1.63901300 |
| O | -0.05936400 | 2.88342300  | -0.65659200 |
| H | -0.48343900 | 2.03947300  | -0.39510600 |
| C | 0.77142900  | -1.16553700 | -1.16335900 |
| H | 0.32659700  | -1.92993100 | -1.79794900 |
| H | -0.10342100 | -1.06274900 | 1.19638300  |
| C | 1.45757900  | 1.25920200  | 3.56217200  |
| H | 2.14339300  | 0.44323600  | 3.81229900  |
| H | 2.03037600  | 2.00789100  | 3.00716100  |
| H | 1.05858200  | 1.69611000  | 4.47899100  |

### INT-5b

|    |             |             |             |
|----|-------------|-------------|-------------|
| Rh | -0.84072900 | -0.22069400 | -0.04711600 |
| C  | 2.30312600  | -3.06648200 | -0.72897200 |
| C  | 1.81327800  | -1.80616700 | -0.33334200 |
| C  | 2.36288500  | -1.27704500 | 0.85278200  |
| C  | 3.35306300  | -1.93668300 | 1.57899600  |
| C  | 3.84292400  | -3.16442700 | 1.13374100  |
| C  | 3.30140900  | -3.73337600 | -0.02065000 |
| H  | 1.89816700  | -3.51458500 | -1.63320400 |
| H  | 3.72912200  | -1.46876100 | 2.48382800  |
| H  | 4.62379500  | -3.67376500 | 1.69063500  |
| H  | 3.65902900  | -4.69655800 | -0.37430600 |
| O  | 1.95237400  | -0.04824400 | 1.35727100  |
| N  | 0.52732900  | -0.08127600 | 1.67747400  |
| C  | 0.20597800  | 1.01876500  | 2.57205000  |
| O  | -0.61974100 | 0.79973400  | 3.43500100  |
| C  | -2.97621200 | 0.51229800  | 0.62800100  |
| C  | -2.86202800 | 0.66451800  | -0.77289900 |
| C  | -2.58280400 | -0.65181500 | -1.32411500 |
| C  | -2.72723900 | -1.63458900 | -0.25820200 |
| C  | -2.89386300 | -0.92127200 | 0.94255300  |
| C  | -2.70035300 | -3.12465800 | -0.44384400 |
| H  | -3.66965800 | -3.49721200 | -0.80605900 |
| H  | -1.94539400 | -3.43062800 | -1.17621500 |
| H  | -2.48040700 | -3.64616800 | 0.49259100  |
| C  | -3.08049800 | -1.48704500 | 2.32182000  |
| H  | -4.13786900 | -1.45497800 | 2.62099700  |
| H  | -2.75772000 | -2.53153500 | 2.37769900  |

|   |             |             |             |
|---|-------------|-------------|-------------|
| H | -2.51591200 | -0.91731400 | 3.06654600  |
| C | -2.53202800 | -0.97702800 | -2.79125500 |
| H | -2.08032900 | -0.16606000 | -3.37154800 |
| H | -1.95611700 | -1.88785500 | -2.98545300 |
| H | -3.54223000 | -1.13998000 | -3.19299300 |
| C | -3.06822700 | 1.91781300  | -1.57667800 |
| H | -2.37925300 | 1.98064100  | -2.42510300 |
| H | -4.08908400 | 1.95524000  | -1.98383600 |
| H | -2.92210100 | 2.81887000  | -0.97430300 |
| C | -3.33192800 | 1.57560700  | 1.62711900  |
| H | -3.15312100 | 2.57870100  | 1.22798700  |
| H | -4.39593200 | 1.51486600  | 1.89863100  |
| H | -2.75596700 | 1.47499500  | 2.55237700  |
| C | 0.67822500  | 0.23468300  | -1.50921800 |
| H | 0.09875100  | 0.39781800  | -2.42129800 |
| C | 1.73792200  | 1.27100400  | -1.35248700 |
| C | 1.35960600  | 2.60866900  | -1.11182300 |
| C | 3.09843400  | 1.00600600  | -1.56851600 |
| C | 2.30650700  | 3.63529400  | -1.08684000 |
| C | 4.05242200  | 2.02400500  | -1.54257700 |
| H | 3.40518400  | -0.01472600 | -1.77723200 |
| C | 3.65161000  | 3.34167400  | -1.30754900 |
| H | 1.97163600  | 4.65063200  | -0.89533500 |
| H | 5.09892000  | 1.79120100  | -1.71924300 |
| H | 4.38548100  | 4.14345800  | -1.29343500 |
| O | 0.05063100  | 2.92888000  | -0.87224400 |
| H | -0.42525900 | 2.07668600  | -0.70958200 |
| C | 0.75774800  | -1.15407100 | -1.13561300 |
| H | 0.30716900  | -1.84881900 | -1.84411500 |
| H | 0.37300900  | -0.94251400 | 2.21258900  |
| C | 0.88817500  | 2.33297900  | 2.33346200  |
| H | 1.96435500  | 2.20082000  | 2.20060400  |
| H | 0.49869200  | 2.79184600  | 1.41835300  |
| H | 0.67856700  | 2.98149400  | 3.18572900  |

**TS-2c**

|    |             |             |             |
|----|-------------|-------------|-------------|
| Rh | 2.78216800  | 7.96923000  | -0.95991300 |
| C  | 0.10980500  | 13.03399100 | -3.37245200 |
| C  | 0.78898000  | 11.93521100 | -2.82631700 |
| C  | 2.14397000  | 12.10368300 | -2.52548200 |
| C  | 2.81299600  | 13.30411300 | -2.77855200 |
| C  | 2.11496400  | 14.37388100 | -3.33175100 |
| C  | 0.75372100  | 14.24401900 | -3.62258100 |
| H  | -0.94439700 | 12.92152800 | -3.61627500 |

|   |             |             |             |
|---|-------------|-------------|-------------|
| H | 3.86770200  | 13.37855500 | -2.53198300 |
| H | 2.63237100  | 15.30876700 | -3.52778200 |
| H | 0.20158300  | 15.07549800 | -4.05041800 |
| O | 2.93298600  | 11.09405400 | -1.98328300 |
| N | 2.23746000  | 10.03761900 | -1.35220400 |
| C | 1.81506000  | 10.27075600 | -0.07717300 |
| O | 1.50371500  | 9.18118100  | 0.50731400  |
| C | 3.58120200  | 6.06652800  | -0.14439100 |
| C | 3.48788900  | 5.89955200  | -1.55700700 |
| C | 4.31654600  | 6.92533000  | -2.13018100 |
| C | 5.16523600  | 7.48974900  | -1.05822300 |
| C | 4.71576800  | 6.97408900  | 0.15054500  |
| C | 6.26600200  | 8.48076900  | -1.29369200 |
| H | 7.12047800  | 8.01502400  | -1.80552000 |
| H | 5.92943000  | 9.31152400  | -1.92523700 |
| H | 6.63577600  | 8.90672900  | -0.35616200 |
| C | 5.22209700  | 7.26607400  | 1.53174700  |
| H | 5.74128100  | 6.39635500  | 1.96009800  |
| H | 5.92630200  | 8.10366200  | 1.53735600  |
| H | 4.40381300  | 7.51665600  | 2.21698000  |
| C | 4.57920800  | 7.12120400  | -3.59693700 |
| H | 4.81326300  | 8.16627100  | -3.82731600 |
| H | 5.43234300  | 6.51402900  | -3.93535000 |
| H | 3.71253300  | 6.82987500  | -4.19879400 |
| C | 2.67343400  | 4.88827700  | -2.30469500 |
| H | 2.13558900  | 5.33481900  | -3.14710700 |
| H | 3.31290100  | 4.08708700  | -2.70469500 |
| H | 1.92527300  | 4.41996300  | -1.65860400 |
| C | 2.88200500  | 5.24750200  | 0.90343200  |
| H | 1.93537200  | 4.84425100  | 0.53261200  |
| H | 3.50342200  | 4.39994300  | 1.22842200  |
| H | 2.65925100  | 5.84806200  | 1.79172000  |
| C | 1.00307700  | 9.40340600  | -2.62297400 |
| H | 1.72737700  | 9.43865200  | -3.43335900 |
| C | 0.28408800  | 8.10117500  | -2.61773600 |
| C | -0.73651800 | 7.75746800  | -1.68986500 |
| C | 0.41152200  | 7.29500800  | -3.77287000 |
| C | -1.57775800 | 6.67259100  | -1.93806500 |
| C | -0.43368800 | 6.21532900  | -4.01357400 |
| H | 1.17036600  | 7.55639800  | -4.50731200 |
| C | -1.44199200 | 5.90615200  | -3.09687600 |
| H | -2.33896200 | 6.44641600  | -1.19733900 |
| H | -0.31450500 | 5.62947700  | -4.92099600 |
| H | -2.11323400 | 5.07104500  | -3.27652400 |

|   |             |             |             |
|---|-------------|-------------|-------------|
| O | -0.94049700 | 8.46992900  | -0.54092600 |
| H | -0.07332700 | 8.65855800  | -0.11116000 |
| C | 0.08400500  | 10.61492500 | -2.61233000 |
| H | -0.50810000 | 10.61060100 | -1.68864400 |
| H | -0.64376600 | 10.46550700 | -3.42299400 |
| C | 1.75882800  | 11.61350400 | 0.58551400  |
| H | 1.55242300  | 11.46251200 | 1.64685300  |
| H | 2.70955100  | 12.14550100 | 0.46895500  |
| H | 0.97666000  | 12.25021300 | 0.15489200  |

#### INT-4c

|    |             |             |             |
|----|-------------|-------------|-------------|
| Rh | 2.81038700  | 7.94204000  | -0.91316900 |
| C  | 0.23172700  | 13.41597700 | -2.56574100 |
| C  | 0.74969100  | 12.11797300 | -2.46298800 |
| C  | 2.12969000  | 11.98765100 | -2.26069400 |
| C  | 2.97233400  | 13.09886100 | -2.18655900 |
| C  | 2.43016300  | 14.37627900 | -2.30195100 |
| C  | 1.05347900  | 14.53861800 | -2.48447900 |
| H  | -0.83753600 | 13.53732900 | -2.72498800 |
| H  | 4.03644200  | 12.94347400 | -2.03653300 |
| H  | 3.08208700  | 15.24326000 | -2.24180100 |
| H  | 0.62536300  | 15.53301900 | -2.57044700 |
| O  | 2.76258800  | 10.74897600 | -2.15453300 |
| N  | 1.87349600  | 9.66836300  | -1.83482100 |
| C  | 1.69967100  | 9.52346700  | -0.37346900 |
| O  | 0.81564800  | 8.60451100  | -0.09681400 |
| C  | 3.89092900  | 6.42701500  | 0.28202100  |
| C  | 3.58024600  | 5.70284900  | -0.96408400 |
| C  | 4.19986600  | 6.37589100  | -2.01647500 |
| C  | 4.90223400  | 7.54212900  | -1.44715700 |
| C  | 4.82921600  | 7.46576900  | -0.01532300 |
| C  | 5.78227600  | 8.47000800  | -2.23474000 |
| H  | 6.77657200  | 8.02805900  | -2.39402500 |
| H  | 5.35800500  | 8.68659000  | -3.21983400 |
| H  | 5.92032000  | 9.42457200  | -1.71867600 |
| C  | 5.57914900  | 8.31646600  | 0.96826500  |
| H  | 6.54984600  | 7.86579200  | 1.22220300  |
| H  | 5.77841200  | 9.31564600  | 0.56840800  |
| H  | 5.02319000  | 8.43904800  | 1.90287900  |
| C  | 4.17050500  | 6.02217500  | -3.47475400 |
| H  | 4.12830800  | 6.91682300  | -4.10468000 |
| H  | 5.07179200  | 5.46397100  | -3.76718700 |
| H  | 3.30178800  | 5.40539100  | -3.72214900 |
| C  | 2.72308500  | 4.47324400  | -1.03769100 |

|   |             |             |             |
|---|-------------|-------------|-------------|
| H | 2.38761500  | 4.27616900  | -2.05973600 |
| H | 3.27277600  | 3.58654300  | -0.69023300 |
| H | 1.83050600  | 4.56670600  | -0.41013500 |
| C | 3.47397100  | 5.96746400  | 1.64947700  |
| H | 2.43389800  | 5.62643900  | 1.65550300  |
| H | 4.09779500  | 5.12964400  | 1.99317600  |
| H | 3.56213200  | 6.77097000  | 2.38668300  |
| C | 0.76760200  | 9.66738400  | -2.87641600 |
| H | 1.34862100  | 9.88270700  | -3.77722400 |
| C | 0.06374500  | 8.35519600  | -3.16833600 |
| C | -1.04888700 | 7.85270900  | -2.45332300 |
| C | 0.45720500  | 7.67176300  | -4.33205300 |
| C | -1.75512000 | 6.74699900  | -2.94962400 |
| C | -0.22596100 | 6.55527100  | -4.80760200 |
| H | 1.31175200  | 8.04858500  | -4.89038200 |
| C | -1.35369200 | 6.10470000  | -4.11624600 |
| H | -2.61194500 | 6.40247700  | -2.37881100 |
| H | 0.10259200  | 6.06018400  | -5.71689100 |
| H | -1.91369100 | 5.24673000  | -4.47973000 |
| O | -1.49028200 | 8.40716500  | -1.29551000 |
| H | -0.68149200 | 8.58326700  | -0.73922900 |
| C | -0.12266000 | 10.88817100 | -2.60683700 |
| H | -0.74129300 | 10.71863900 | -1.71940000 |
| H | -0.81728000 | 11.01669000 | -3.44583000 |
| C | 1.98513500  | 10.65219200 | 0.58289600  |
| H | 2.06503500  | 10.21737200 | 1.58283900  |
| H | 2.90977600  | 11.17848000 | 0.34271100  |
| H | 1.16022300  | 11.37742700 | 0.59206700  |

**TS-3e**

|    |             |             |             |
|----|-------------|-------------|-------------|
| Rh | 2.23343000  | 8.65719200  | -1.58581300 |
| C  | 0.58580300  | 12.22649000 | -4.36806300 |
| C  | 0.93914900  | 11.38151200 | -3.31384200 |
| C  | 2.24490300  | 11.46349800 | -2.76729100 |
| C  | 3.14275400  | 12.41941700 | -3.29423100 |
| C  | 2.75654600  | 13.26935000 | -4.32810000 |
| C  | 1.47717700  | 13.17286600 | -4.88112000 |
| H  | -0.41832100 | 12.15273300 | -4.78291800 |
| H  | 4.13044500  | 12.49649300 | -2.84644300 |
| H  | 3.46126000  | 14.00637500 | -4.70700600 |
| H  | 1.17485500  | 13.82650200 | -5.69453300 |
| O  | 2.63403000  | 10.70623800 | -1.74393600 |
| N  | 1.18842000  | 9.00093200  | -0.05689300 |
| C  | 0.90228800  | 8.91745900  | 1.20956700  |

|   |             |             |             |
|---|-------------|-------------|-------------|
| O | -0.25255100 | 8.56732900  | 1.65149300  |
| C | 2.95060500  | 6.44355800  | -1.78090600 |
| C | 3.19880900  | 7.06817000  | -3.06199200 |
| C | 4.07842200  | 8.16281800  | -2.85595100 |
| C | 4.43937100  | 8.19479400  | -1.44798300 |
| C | 3.76407300  | 7.11016100  | -0.79864600 |
| C | 5.39131500  | 9.18420600  | -0.84966500 |
| H | 6.39276000  | 9.07807800  | -1.28690300 |
| H | 5.03725500  | 10.20254900 | -1.04718400 |
| H | 5.48323500  | 9.05747800  | 0.23233000  |
| C | 3.90572300  | 6.68988000  | 0.63478900  |
| H | 4.59234500  | 5.83641500  | 0.71552600  |
| H | 4.30442300  | 7.49521600  | 1.25600800  |
| H | 2.94719300  | 6.38046000  | 1.06189600  |
| C | 4.65420600  | 9.06610100  | -3.90315100 |
| H | 4.63846900  | 10.10959500 | -3.57780300 |
| H | 5.69696200  | 8.79129700  | -4.11390300 |
| H | 4.09696900  | 9.00363500  | -4.84152100 |
| C | 2.72898900  | 6.55957500  | -4.39067200 |
| H | 2.48415400  | 7.37263400  | -5.08158200 |
| H | 3.52230700  | 5.96256900  | -4.86132300 |
| H | 1.85076900  | 5.91984900  | -4.29093900 |
| C | 2.15324400  | 5.19337800  | -1.55396400 |
| H | 1.26056100  | 5.16039300  | -2.18414500 |
| H | 2.75968700  | 4.30562100  | -1.78371400 |
| H | 1.82860600  | 5.10961200  | -0.51343500 |
| C | 0.42884000  | 8.93304400  | -2.92649800 |
| H | 0.89728100  | 8.80882700  | -3.90627700 |
| C | -0.48202500 | 7.82365000  | -2.63229900 |
| C | -1.21216900 | 7.72093900  | -1.40373500 |
| C | -0.64358000 | 6.77675900  | -3.57371100 |
| C | -1.94273300 | 6.54395000  | -1.11969400 |
| C | -1.42094500 | 5.65907000  | -3.31184200 |
| H | -0.16115900 | 6.87764700  | -4.54188800 |
| C | -2.05639300 | 5.53520300  | -2.06224300 |
| H | -2.45533500 | 6.47911000  | -0.16399900 |
| H | -1.54694700 | 4.88987000  | -4.06872700 |
| H | -2.65884800 | 4.65718900  | -1.84338600 |
| O | -1.17803700 | 8.73119100  | -0.55589200 |
| H | -0.95008700 | 8.52578000  | 0.52263600  |
| C | -0.02122000 | 10.38478600 | -2.72574600 |
| H | -0.19981900 | 10.57123200 | -1.66542400 |
| H | -0.99386100 | 10.48529300 | -3.23215700 |
| C | 1.95306200  | 9.34575800  | 2.22194800  |



|   |            |             |            |
|---|------------|-------------|------------|
| H | 2.88256700 | 9.66221900  | 1.74470000 |
| H | 1.54320200 | 10.17723700 | 2.80418500 |
| H | 2.14489500 | 8.51536700  | 2.90958100 |

**INT-5e**

|    |             |             |             |
|----|-------------|-------------|-------------|
| Rh | 0.13733400  | 0.54414400  | 0.20225200  |
| C  | -3.71457900 | -1.87461200 | -1.44323200 |
| C  | -2.69895900 | -1.31919600 | -0.66258100 |
| C  | -2.84952000 | -0.00314300 | -0.15753200 |
| C  | -4.04247900 | 0.69778100  | -0.44415300 |
| C  | -5.05145700 | 0.11353300  | -1.20776800 |
| C  | -4.89186500 | -1.17480500 | -1.72286800 |
| H  | -3.58563500 | -2.88582800 | -1.82660800 |
| H  | -4.16481200 | 1.69452700  | -0.02713400 |
| H  | -5.96427500 | 0.67144000  | -1.40535700 |
| H  | -5.67172900 | -1.63139100 | -2.32585100 |
| O  | -1.92624500 | 0.56780900  | 0.61484800  |
| N  | 0.36919300  | -0.44140400 | 1.83732900  |
| C  | -0.11601900 | -0.56290100 | 3.00503000  |
| O  | 0.16281200  | -1.65342000 | 3.75101700  |
| C  | 2.05613300  | 1.64033200  | -0.47486900 |
| C  | 1.13696800  | 1.71586700  | -1.59969200 |
| C  | -0.03369400 | 2.37381900  | -1.16451200 |
| C  | 0.15934000  | 2.76487800  | 0.23233800  |
| C  | 1.47352700  | 2.35143700  | 0.62838600  |
| C  | -0.84159700 | 3.54936600  | 1.02101500  |
| H  | -1.01352300 | 4.53270600  | 0.56381300  |
| H  | -1.79470700 | 3.00890000  | 1.04242600  |
| H  | -0.51370600 | 3.71022700  | 2.05127100  |
| C  | 2.13878900  | 2.60074400  | 1.95020400  |
| H  | 2.89989800  | 3.38692000  | 1.85787800  |
| H  | 1.41903100  | 2.92229700  | 2.70688400  |
| H  | 2.63316900  | 1.69949500  | 2.32511900  |
| C  | -1.23705300 | 2.72591200  | -1.98515600 |
| H  | -2.16285500 | 2.44182100  | -1.47635600 |
| H  | -1.27245200 | 3.80824800  | -2.17056600 |
| H  | -1.22343800 | 2.22258100  | -2.95554800 |
| C  | 1.43848700  | 1.27847300  | -3.00177800 |
| H  | 0.55777800  | 0.86459500  | -3.50284700 |
| H  | 1.77973000  | 2.13603400  | -3.59803900 |
| H  | 2.23005200  | 0.52734100  | -3.02757000 |
| C  | 3.45583200  | 1.10395900  | -0.52228300 |
| H  | 3.52348600  | 0.18708100  | -1.11481400 |
| H  | 4.13413000  | 1.84346100  | -0.97168200 |

|   |             |             |             |
|---|-------------|-------------|-------------|
| H | 3.82820700  | 0.87986600  | 0.48079000  |
| C | -0.19204200 | -1.46864100 | -0.94786100 |
| H | -0.38903400 | -1.07285500 | -1.94693100 |
| C | 1.10695700  | -2.04935900 | -0.82629100 |
| C | 1.58978500  | -2.69019300 | 0.40456200  |
| C | 1.98803500  | -2.03237700 | -1.95492600 |
| C | 2.95908400  | -3.15631200 | 0.42503400  |
| C | 3.25541400  | -2.55835000 | -1.90739000 |
| H | 1.60547500  | -1.63299400 | -2.89034700 |
| C | 3.75002300  | -3.11557300 | -0.69031000 |
| H | 3.30877300  | -3.58824000 | 1.35834600  |
| H | 3.87770700  | -2.57129200 | -2.79811100 |
| H | 4.75941200  | -3.51920600 | -0.66031400 |
| O | 0.85418500  | -2.80222000 | 1.42378300  |
| H | 0.62541100  | -2.27204800 | 3.13359900  |
| C | -1.44454600 | -2.07560100 | -0.31951800 |
| H | -1.30827500 | -2.17715100 | 0.75739300  |
| H | -1.52534700 | -3.09906000 | -0.71926400 |
| C | -0.98809600 | 0.44145900  | 3.71430900  |
| H | -1.42971100 | 1.13015000  | 2.99483200  |
| H | -1.78408800 | -0.08938400 | 4.24568900  |
| H | -0.39745700 | 0.98964400  | 4.45818100  |

**TS-4e**

|    |             |             |             |
|----|-------------|-------------|-------------|
| Rh | 0.14147800  | 0.59204900  | 0.22482700  |
| C  | -3.69760900 | -1.88442700 | -1.43834900 |
| C  | -2.68974100 | -1.32824000 | -0.64835600 |
| C  | -2.83827100 | -0.00704300 | -0.15379800 |
| C  | -4.02545900 | 0.69586800  | -0.46199800 |
| C  | -5.02621400 | 0.11214000  | -1.23667500 |
| C  | -4.86668600 | -1.18038600 | -1.74099000 |
| H  | -3.56994300 | -2.90010000 | -1.81048500 |
| H  | -4.14992500 | 1.69502800  | -0.05141900 |
| H  | -5.93337100 | 0.67337300  | -1.45049000 |
| H  | -5.64056000 | -1.63742500 | -2.35125900 |
| O  | -1.92543800 | 0.56460000  | 0.62880100  |
| N  | 0.38290600  | -0.41262900 | 1.84189900  |
| C  | -0.11072800 | -0.55583500 | 3.00233400  |
| O  | 0.14752600  | -1.67236100 | 3.72132000  |
| C  | 2.05113800  | 1.66984300  | -0.47969000 |
| C  | 1.12495300  | 1.74141900  | -1.60391100 |
| C  | -0.04156200 | 2.40343800  | -1.17061100 |
| C  | 0.14878000  | 2.78377500  | 0.22891500  |
| C  | 1.47426200  | 2.38062500  | 0.62118600  |

|   |             |             |             |
|---|-------------|-------------|-------------|
| C | -0.84777600 | 3.57218400  | 1.02007400  |
| H | -1.00542500 | 4.56200300  | 0.57154100  |
| H | -1.80674100 | 3.04264300  | 1.03348000  |
| H | -0.52259300 | 3.71922000  | 2.05326700  |
| C | 2.14184300  | 2.64456400  | 1.93880200  |
| H | 2.87313400  | 3.45843000  | 1.84411500  |
| H | 1.41803800  | 2.93595500  | 2.70379900  |
| H | 2.67097100  | 1.75946200  | 2.30427400  |
| C | -1.24959800 | 2.75018600  | -1.98678100 |
| H | -2.17157000 | 2.44134100  | -1.48518200 |
| H | -1.30305100 | 3.83492900  | -2.15213600 |
| H | -1.22624700 | 2.26540200  | -2.96637500 |
| C | 1.42368000  | 1.29052800  | -3.00218000 |
| H | 0.53514200  | 0.90015100  | -3.50798000 |
| H | 1.79477700  | 2.13492000  | -3.59964000 |
| H | 2.19393100  | 0.51711100  | -3.01927300 |
| C | 3.44942600  | 1.13005500  | -0.53398200 |
| H | 3.50971200  | 0.20584100  | -1.11583400 |
| H | 4.12522400  | 1.86213400  | -0.99890400 |
| H | 3.83099600  | 0.91718000  | 0.46807200  |
| C | -0.19554400 | -1.56641200 | -0.96444600 |
| H | -0.39698900 | -1.13320300 | -1.94599500 |
| C | 1.09798200  | -2.11452100 | -0.83353700 |
| C | 1.57294700  | -2.77779400 | 0.39696400  |
| C | 1.99677300  | -2.05711200 | -1.95379600 |
| C | 2.94939600  | -3.23533300 | 0.41538400  |
| C | 3.26614400  | -2.56656800 | -1.90094300 |
| H | 1.61910800  | -1.63945700 | -2.88322300 |
| C | 3.75021600  | -3.15150900 | -0.68734200 |
| H | 3.29448500  | -3.68748300 | 1.34064200  |
| H | 3.90364500  | -2.54895300 | -2.78056300 |
| H | 4.76500000  | -3.54158800 | -0.65557400 |
| O | 0.83346500  | -2.91745100 | 1.40189300  |
| H | 0.59211500  | -2.28955300 | 3.09027700  |
| C | -1.44685800 | -2.09412100 | -0.28127400 |
| H | -1.29626800 | -2.14341900 | 0.79683900  |
| H | -1.55695300 | -3.13745000 | -0.62021400 |
| C | -0.97363200 | 0.43595400  | 3.74019000  |
| H | -1.37197500 | 1.17770700  | 3.04880800  |
| H | -1.80249900 | -0.09580900 | 4.21780400  |
| H | -0.39060500 | 0.92301400  | 4.53116700  |

**INT-6e**

|    |            |            |            |
|----|------------|------------|------------|
| Rh | 0.26661000 | 1.15685800 | 0.14200800 |
|----|------------|------------|------------|

|   |             |             |             |
|---|-------------|-------------|-------------|
| C | -4.20133900 | -1.42156700 | -0.85768100 |
| C | -2.81120200 | -1.30483000 | -0.78898900 |
| C | -2.18532400 | -0.09446200 | -1.17738700 |
| C | -2.99763100 | 0.97619300  | -1.60346800 |
| C | -4.38339100 | 0.84501800  | -1.65801900 |
| C | -4.99576700 | -0.35557600 | -1.28613000 |
| H | -4.67001000 | -2.35947400 | -0.56417400 |
| H | -2.51322200 | 1.90367100  | -1.89823100 |
| H | -4.98941300 | 1.68216900  | -1.99766400 |
| H | -6.07601600 | -0.46240000 | -1.33238700 |
| O | -0.85071200 | -0.02526100 | -1.18635500 |
| N | -0.88461000 | 0.66610100  | 1.55702400  |
| C | -1.67074600 | 0.17180100  | 2.40862600  |
| O | -1.50287400 | -1.04100600 | 2.99720700  |
| C | 2.11579800  | 2.10800800  | 0.91237500  |
| C | 2.48035700  | 1.10029800  | -0.06599200 |
| C | 1.91586500  | 1.48266900  | -1.33183700 |
| C | 1.19588400  | 2.70893500  | -1.15104400 |
| C | 1.32601700  | 3.09885200  | 0.23805400  |
| C | 0.49744500  | 3.47908400  | -2.23158400 |
| H | 1.18591900  | 4.18863900  | -2.71259800 |
| H | 0.11369400  | 2.81009100  | -3.00680700 |
| H | -0.34660100 | 4.05390700  | -1.83892700 |
| C | 0.77778800  | 4.35539600  | 0.84468300  |
| H | 1.48874300  | 5.18320100  | 0.71440900  |
| H | -0.16372200 | 4.65044100  | 0.37311300  |
| H | 0.59508800  | 4.23797700  | 1.91592200  |
| C | 1.98628400  | 0.71273700  | -2.61771400 |
| H | 0.98244700  | 0.38611400  | -2.91414800 |
| H | 2.40419500  | 1.33062300  | -3.42177300 |
| H | 2.61114300  | -0.17795600 | -2.51681000 |
| C | 3.36074500  | -0.08281100 | 0.19464800  |
| H | 3.15738300  | -0.90211500 | -0.49821700 |
| H | 4.41780600  | 0.19911800  | 0.08197900  |
| H | 3.22690100  | -0.46737300 | 1.20902900  |
| C | 2.57416700  | 2.15464800  | 2.34013200  |
| H | 2.71370900  | 1.14973600  | 2.74811300  |
| H | 3.53230500  | 2.68562700  | 2.42568800  |
| H | 1.84948000  | 2.67081800  | 2.97595600  |
| C | -0.65795500 | -2.57202500 | -1.02322500 |
| H | -0.77508500 | -2.49482900 | -2.10405200 |
| C | 0.58556900  | -2.97291200 | -0.58697100 |
| C | 0.96547500  | -3.13252300 | 0.84353800  |
| C | 1.57276900  | -3.28772000 | -1.60027700 |

|   |             |             |             |
|---|-------------|-------------|-------------|
| C | 2.28034100  | -3.71329300 | 1.09242700  |
| C | 2.79837800  | -3.79610500 | -1.29470900 |
| H | 1.28916000  | -3.13018500 | -2.63901200 |
| C | 3.14091800  | -4.02332500 | 0.08231000  |
| H | 2.53958800  | -3.87197600 | 2.13497100  |
| H | 3.50943800  | -4.04782300 | -2.07580500 |
| H | 4.11543700  | -4.44757100 | 0.31637300  |
| O | 0.24307500  | -2.80117400 | 1.80639900  |
| H | -0.76981300 | -1.53610300 | 2.55631300  |
| C | -1.93237300 | -2.41986700 | -0.26194000 |
| H | -1.73058800 | -2.30863700 | 0.80302000  |
| H | -2.47288500 | -3.37556200 | -0.37426100 |
| C | -2.92862100 | 0.85494900  | 2.89148100  |
| H | -2.99343800 | 1.86796000  | 2.49172000  |
| H | -3.80184400 | 0.28054300  | 2.56242300  |
| H | -2.93987600 | 0.88437300  | 3.98676700  |

**TS-5e**

|    |             |             |             |
|----|-------------|-------------|-------------|
| Rh | 0.32600000  | 0.99886800  | 0.15442300  |
| C  | -4.33184800 | -1.35015500 | -0.67922600 |
| C  | -2.93962600 | -1.35411700 | -0.69680800 |
| C  | -2.23824400 | -0.19463100 | -1.06827600 |
| C  | -2.93024500 | 0.96892000  | -1.42166300 |
| C  | -4.32731300 | 0.96174600  | -1.39519400 |
| C  | -5.03116800 | -0.18803200 | -1.02533200 |
| H  | -4.87316400 | -2.24977800 | -0.39470700 |
| H  | -2.37984800 | 1.85986200  | -1.70962900 |
| H  | -4.86983500 | 1.86276800  | -1.67109800 |
| H  | -6.11746600 | -0.18304300 | -1.01308300 |
| O  | -0.88538700 | -0.31681400 | -1.08519500 |
| N  | -0.80122000 | 0.56254400  | 1.58730900  |
| C  | -1.66177100 | 0.06225900  | 2.37097300  |
| O  | -1.55204400 | -1.14584000 | 2.94032300  |
| C  | 2.08628700  | 2.05468500  | 0.90965900  |
| C  | 2.56205900  | 1.04883100  | -0.02028200 |
| C  | 2.00542200  | 1.34692700  | -1.30934400 |
| C  | 1.21532400  | 2.54144600  | -1.20295500 |
| C  | 1.27134600  | 2.98633000  | 0.16834100  |
| C  | 0.52101900  | 3.23714300  | -2.33572600 |
| H  | 1.19976100  | 3.94524900  | -2.83210800 |
| H  | 0.17942400  | 2.52406500  | -3.09135100 |
| H  | -0.34924100 | 3.80333400  | -1.99073500 |
| C  | 0.64541900  | 4.23582200  | 0.71063200  |
| H  | 1.32548800  | 5.08827900  | 0.57445400  |

|   |             |             |             |
|---|-------------|-------------|-------------|
| H | -0.29030000 | 4.47354500  | 0.19701700  |
| H | 0.43100300  | 4.14822800  | 1.77863000  |
| C | 2.21507400  | 0.57077300  | -2.57516100 |
| H | 1.26510300  | 0.40647500  | -3.09364500 |
| H | 2.88117400  | 1.11867600  | -3.25505400 |
| H | 2.65860000  | -0.40698400 | -2.37793500 |
| C | 3.51438400  | -0.05834000 | 0.30615700  |
| H | 3.36448000  | -0.92931400 | -0.33490500 |
| H | 4.55024700  | 0.28721500  | 0.17384900  |
| H | 3.40526500  | -0.39077500 | 1.34128700  |
| C | 2.48510300  | 2.17728600  | 2.35041800  |
| H | 2.65894700  | 1.19597000  | 2.79941600  |
| H | 3.41103400  | 2.76049400  | 2.44795000  |
| H | 1.71079100  | 2.67687700  | 2.93868300  |
| C | -0.69860800 | -2.22590400 | -1.05029800 |
| H | -0.80769200 | -2.24847800 | -2.13399400 |
| C | 0.58395600  | -2.66250700 | -0.60611200 |
| C | 0.91746600  | -2.94821500 | 0.79025100  |
| C | 1.54992700  | -2.93517500 | -1.62232600 |
| C | 2.20972000  | -3.56396000 | 1.01065400  |
| C | 2.77685900  | -3.49784700 | -1.35548600 |
| H | 1.27406800  | -2.71478900 | -2.65298100 |
| C | 3.09171200  | -3.82362400 | -0.00839800 |
| H | 2.44714600  | -3.81256000 | 2.04131100  |
| H | 3.47564900  | -3.72185800 | -2.15606400 |
| H | 4.04993200  | -4.28910400 | 0.21674100  |
| O | 0.16477200  | -2.71474500 | 1.78248700  |
| H | -0.81781200 | -1.67382900 | 2.49187300  |
| C | -2.00781100 | -2.48582600 | -0.34148000 |
| H | -1.84984400 | -2.57523000 | 0.73495900  |
| H | -2.39592500 | -3.44915400 | -0.70196300 |
| C | -2.92994000 | 0.78489900  | 2.76220100  |
| H | -2.92758700 | 1.80939600  | 2.38681000  |
| H | -3.79122700 | 0.24990600  | 2.34728700  |
| H | -3.02753000 | 0.78750500  | 3.85333800  |

### INT-7e

|    |             |             |             |
|----|-------------|-------------|-------------|
| Rh | 0.36627700  | 0.97140300  | 0.16291100  |
| C  | -4.42001100 | -1.43460800 | -0.64074300 |
| C  | -3.02958700 | -1.46703100 | -0.67924200 |
| C  | -2.32606000 | -0.29489500 | -0.96658600 |
| C  | -2.96145600 | 0.91345400  | -1.22441200 |
| C  | -4.36098900 | 0.93184900  | -1.18312400 |
| C  | -5.08622100 | -0.22774300 | -0.89437400 |

|   |             |             |             |
|---|-------------|-------------|-------------|
| H | -4.98381300 | -2.33660900 | -0.41657300 |
| H | -2.38857300 | 1.80879000  | -1.44405000 |
| H | -4.88640100 | 1.86202500  | -1.38283000 |
| H | -6.17182700 | -0.19477500 | -0.87098800 |
| O | -0.95541600 | -0.48559200 | -0.97769400 |
| N | -0.76021900 | 0.63277000  | 1.61613300  |
| C | -1.66569900 | 0.09271900  | 2.33217300  |
| O | -1.58480600 | -1.12177600 | 2.85380500  |
| C | 2.09933600  | 2.02908700  | 0.90291100  |
| C | 2.61102500  | 1.02778800  | -0.01006700 |
| C | 2.07166500  | 1.31121600  | -1.31028000 |
| C | 1.26955900  | 2.49926100  | -1.23286500 |
| C | 1.28466200  | 2.95017200  | 0.13561600  |
| C | 0.59290600  | 3.18319900  | -2.38396600 |
| H | 1.27897000  | 3.88757200  | -2.87541800 |
| H | 0.26417000  | 2.46520300  | -3.14075500 |
| H | -0.28306200 | 3.75252200  | -2.05909600 |
| C | 0.64563200  | 4.20049600  | 0.66010900  |
| H | 1.33911600  | 5.04726700  | 0.56084500  |
| H | -0.26469700 | 4.45163100  | 0.10875600  |
| H | 0.38466900  | 4.10485500  | 1.71684900  |
| C | 2.35530800  | 0.54084300  | -2.56430600 |
| H | 1.48334500  | 0.51529000  | -3.22465600 |
| H | 3.17700800  | 1.01556700  | -3.11833600 |
| H | 2.64179800  | -0.48946400 | -2.34545300 |
| C | 3.57739200  | -0.06069000 | 0.33358200  |
| H | 3.43721600  | -0.94417800 | -0.29255000 |
| H | 4.60833700  | 0.29726400  | 0.19462500  |
| H | 3.47175000  | -0.37882100 | 1.37331200  |
| C | 2.46910900  | 2.17266600  | 2.34886500  |
| H | 2.67310300  | 1.20027900  | 2.80388800  |
| H | 3.37084300  | 2.79122100  | 2.45494600  |
| H | 1.66704600  | 2.64498300  | 2.92185800  |
| C | -0.75697100 | -2.03139900 | -1.08910000 |
| H | -0.82629100 | -2.15867400 | -2.17460400 |
| C | 0.56877400  | -2.51406100 | -0.62678700 |
| C | 0.87135900  | -2.82067300 | 0.75564800  |
| C | 1.50917200  | -2.82487300 | -1.63125800 |
| C | 2.15184200  | -3.43092200 | 0.99210400  |
| C | 2.74155300  | -3.40573400 | -1.36098000 |
| H | 1.23726400  | -2.61974000 | -2.66708800 |
| C | 3.04654800  | -3.71573400 | -0.02092300 |
| H | 2.37472800  | -3.68504600 | 2.02508200  |
| H | 3.43081200  | -3.65013700 | -2.16421300 |

|   |             |             |             |
|---|-------------|-------------|-------------|
| H | 3.99545300  | -4.19283100 | 0.21978500  |
| O | 0.07858200  | -2.62733500 | 1.74750500  |
| H | -0.83578100 | -1.66752000 | 2.38427500  |
| C | -2.04087800 | -2.57932100 | -0.44235100 |
| H | -1.87623800 | -2.77024800 | 0.62207800  |
| H | -2.32481700 | -3.52109100 | -0.92413100 |
| C | -2.94260400 | 0.82426200  | 2.68176700  |
| H | -2.91233000 | 1.85960900  | 2.33820400  |
| H | -3.78978400 | 0.31084300  | 2.21434900  |
| H | -3.08813400 | 0.79670800  | 3.76713300  |

**TS-3d**

|    |             |             |             |
|----|-------------|-------------|-------------|
| Rh | 0.69631300  | -0.87782700 | 0.18039700  |
| C  | 1.95487600  | 3.75475000  | -0.29575000 |
| C  | 1.55014800  | 2.55472100  | 0.29024200  |
| C  | 2.49562600  | 1.51832400  | 0.52245300  |
| C  | 3.84875900  | 1.76162500  | 0.18353500  |
| C  | 4.23457100  | 2.97475800  | -0.38300500 |
| C  | 3.29104500  | 3.97455300  | -0.64147800 |
| H  | 1.21736100  | 4.53886000  | -0.46119000 |
| H  | 4.58280700  | 0.99475200  | 0.41326500  |
| H  | 5.28218000  | 3.14361300  | -0.62326300 |
| H  | 3.59409800  | 4.91803600  | -1.08667700 |
| O  | 2.12070600  | 0.38577900  | 1.09953100  |
| N  | -0.67984300 | -0.40006100 | 1.45811800  |
| C  | -1.77550100 | -1.21635500 | 1.57675000  |
| O  | -2.55013400 | -1.54823900 | 0.67087400  |
| C  | 0.06603900  | -2.09607600 | -1.59837300 |
| C  | 1.31445200  | -1.40490300 | -1.91488900 |
| C  | 2.33643800  | -1.91544400 | -1.06026300 |
| C  | 1.72410900  | -2.83473900 | -0.14535700 |
| C  | 0.32374200  | -2.99027900 | -0.52113700 |
| C  | 2.43469100  | -3.59713800 | 0.93119500  |
| H  | 2.91318500  | -4.49594200 | 0.51780700  |
| H  | 3.21263500  | -2.98709500 | 1.39811500  |
| H  | 1.74514700  | -3.91879700 | 1.71600900  |
| C  | -0.64198700 | -3.98954300 | 0.03572200  |
| H  | -0.68891000 | -4.87197400 | -0.61747200 |
| H  | -0.34094400 | -4.33198000 | 1.03012000  |
| H  | -1.64682200 | -3.56385100 | 0.10982100  |
| C  | 3.78290400  | -1.53452600 | -1.08848300 |
| H  | 4.25198800  | -1.67619200 | -0.11187600 |
| H  | 4.32404200  | -2.15479800 | -1.81639400 |
| H  | 3.91981800  | -0.48733300 | -1.36969000 |



|   |             |             |             |
|---|-------------|-------------|-------------|
| C | 1.52633200  | -0.42768000 | -3.03269700 |
| H | 2.26936200  | 0.32949000  | -2.76578600 |
| H | 1.88428500  | -0.94534600 | -3.93351900 |
| H | 0.60114400  | 0.08959600  | -3.30175500 |
| C | -1.23853000 | -1.97373100 | -2.32696300 |
| H | -1.22995800 | -1.14100800 | -3.03465400 |
| H | -1.44024800 | -2.88961700 | -2.89895900 |
| H | -2.05524800 | -1.81727200 | -1.61648900 |
| C | -0.61238400 | 1.35687000  | -0.18385500 |
| H | -0.09635500 | 1.19358500  | -1.12897500 |
| C | -2.05129800 | 1.47420000  | -0.36217300 |
| C | -2.93184400 | 1.72856000  | 0.72425800  |
| C | -2.59699600 | 1.46445900  | -1.66491600 |
| C | -4.27342600 | 2.04531900  | 0.48678700  |
| C | -3.93254500 | 1.75825700  | -1.89858500 |
| H | -1.93318200 | 1.26109000  | -2.50182900 |
| C | -4.76682100 | 2.06202600  | -0.81347600 |
| H | -4.91353800 | 2.24707800  | 1.33966600  |
| H | -4.32380800 | 1.76396100  | -2.91138100 |
| H | -5.81352900 | 2.29945600  | -0.98411800 |
| O | -2.51094100 | 1.67117500  | 2.00659200  |
| H | -1.67834300 | 1.13769200  | 2.03982500  |
| C | 0.14602400  | 2.29434900  | 0.75263100  |
| H | 0.17829000  | 1.88019000  | 1.76653200  |
| H | -0.41888100 | 3.23486300  | 0.80258700  |
| C | -2.04494800 | -1.63502200 | 3.02531200  |
| H | -1.14097600 | -1.60899900 | 3.63966000  |
| H | -2.77640400 | -0.94282100 | 3.45832200  |
| H | -2.47971600 | -2.63886000 | 3.02827300  |

#### INT-5d

|    |             |             |             |
|----|-------------|-------------|-------------|
| Rh | 0.85820100  | -0.94737800 | -0.08902600 |
| C  | 1.48095100  | 3.85599100  | -0.92945500 |
| C  | 1.24495900  | 2.69189700  | -0.19371100 |
| C  | 2.23857800  | 1.68833500  | -0.14985800 |
| C  | 3.45761800  | 1.90288300  | -0.82883400 |
| C  | 3.67550600  | 3.07573600  | -1.54986800 |
| C  | 2.68311900  | 4.05677100  | -1.61271700 |
| H  | 0.71312500  | 4.62748800  | -0.95298100 |
| H  | 4.23452400  | 1.14738700  | -0.75697000 |
| H  | 4.62461400  | 3.22575100  | -2.05956800 |
| H  | 2.84776600  | 4.97299600  | -2.17294000 |
| O  | 2.04794000  | 0.58002300  | 0.57876400  |
| N  | -0.84734700 | 0.15531900  | -0.15123600 |

|   |             |             |             |
|---|-------------|-------------|-------------|
| C | -1.80997900 | -0.50409900 | -0.97098300 |
| O | -2.02729400 | -0.17793900 | -2.12782500 |
| C | 0.73523600  | -2.73219400 | -1.49582700 |
| C | 2.00533500  | -2.00285600 | -1.57567100 |
| C | 2.71322700  | -2.20334000 | -0.33477900 |
| C | 1.82984000  | -2.87316400 | 0.55287900  |
| C | 0.62551500  | -3.25442500 | -0.18527100 |
| C | 2.12972100  | -3.24786800 | 1.97243900  |
| H | 2.56707100  | -4.25540800 | 2.02085500  |
| H | 2.84117600  | -2.55125900 | 2.42337100  |
| H | 1.22545200  | -3.25280400 | 2.58811300  |
| C | -0.42854100 | -4.16970600 | 0.35964000  |
| H | -0.02663500 | -5.18887300 | 0.44256900  |
| H | -0.75103100 | -3.86925400 | 1.36195200  |
| H | -1.31126900 | -4.21117600 | -0.28039100 |
| C | 4.07838800  | -1.69778900 | 0.01754200  |
| H | 3.99478900  | -0.81435300 | 0.66171300  |
| H | 4.65242100  | -2.46886100 | 0.54314500  |
| H | 4.63821400  | -1.41339600 | -0.87735300 |
| C | 2.54743800  | -1.33931700 | -2.80353600 |
| H | 3.09229000  | -0.42381400 | -2.55286400 |
| H | 3.23641500  | -2.01276400 | -3.33303900 |
| H | 1.74350100  | -1.07053200 | -3.49379800 |
| C | -0.19495100 | -2.93625100 | -2.65311900 |
| H | -0.53956200 | -1.98652900 | -3.07541900 |
| H | 0.31483700  | -3.49535600 | -3.44833800 |
| H | -1.08134600 | -3.50414800 | -2.36154600 |
| C | -1.09835600 | 1.62753700  | -0.16495600 |
| H | -1.14027900 | 1.95839200  | -1.20907000 |
| C | -2.46709900 | 1.89863500  | 0.46729200  |
| C | -2.82465700 | 1.33550400  | 1.71187000  |
| C | -3.36523900 | 2.78043500  | -0.14384700 |
| C | -4.03732100 | 1.67928300  | 2.32079600  |
| C | -4.57562700 | 3.12683700  | 0.45823300  |
| H | -3.10138900 | 3.20429900  | -1.11049100 |
| C | -4.90384600 | 2.57647000  | 1.69945000  |
| H | -4.27864900 | 1.22882100  | 3.27903800  |
| H | -5.25393300 | 3.81554500  | -0.03726000 |
| H | -5.84231400 | 2.83684400  | 2.18228500  |
| O | -2.01632800 | 0.44523900  | 2.35876000  |
| H | -1.35308400 | 0.13500700  | 1.69936000  |
| C | -0.03156900 | 2.48040400  | 0.56784200  |
| H | 0.17568800  | 2.03035200  | 1.54435100  |
| H | -0.49937200 | 3.45335100  | 0.75288300  |

|   |             |             |             |
|---|-------------|-------------|-------------|
| C | -2.63907700 | -1.58378800 | -0.29783900 |
| H | -2.14307700 | -2.03917100 | 0.55946600  |
| H | -3.54486200 | -1.08899300 | 0.07605100  |
| H | -2.94996300 | -2.33979000 | -1.02370200 |

## VI. References

[S1] (a) B. Ye, N. Cramer, *J. Am. Chem. Soc.*, 2013, **135**, 636; (b) J. Zheng, W.-J. Cui, C. Zheng, S.-L. You, *J. Am. Chem. Soc.*, 2016, **138**, 5242; (c) Y. Sun, N. Cramer, *Angew. Chem., Int. Ed.*, 2018, **57**, 15539.

[S2] (a) H. M. Petrassi, K. B. Sharpless, J. W. Kelly, *Org. Lett.*, 2001, **3**, 139; (b) N. Takeda, O. Miyata, T. Naito, *Eur. J. Org. Chem.*, 2007, 1491. (c) D. Tang, Y. Gai, A. Polemeropoulos, Z. Chen, Z. Wang, *Bioorg. Med. Chem. Lett.*, 2008, **18**, 5078; (d) G. Liu, Y. Shen, Z. Zhou, X. Lu, *Angew. Chem., Int. Ed.*, 2013, **52**, 6033.

[S3] (a) A. Seoane, N. Casanova, N. Quiñones, J. L. Mascareñas, M. Gulías, *J. Am. Chem. Soc.*, 2014, **136**, 834; (b) A. Seoane, N. Casanova, N. Quiñones, J. L. Mascareñas, M. Gulías, *J. Am. Chem. Soc.*, 2014, **136**, 7607.

[S4] Y. Shen, G. Liu, Z. Zhou, X. Lu, *Org. Lett.*, 2013, **15**, 3366.

[S5] X. Wang, A. Lerchen, T. Gensch, T. Knecht, C. G. Daniliuc, F. Glorius, *Angew. Chem., Int. Ed.*, 2017, **56**, 1381.

[S6] M. J. Frisch, G. W. Trucks, H. B. Schlegel, G. E. Scuseria, M. A. Robb, J. R. Cheeseman, G. Scalmani, V. Barone, B. Mennucci, G. A. Petersson, H. Nakatsuji, M. Caricato, X. Li, H. P. Hratchian, A. F. Izmaylov, J. Bloino, G. Zheng, J. L. Sonnenberg, M. Hada, M. Ehara, K. Toyota, R. Fukuda, J. Hasegawa, M. Ishida, T. Nakajima, Y. Honda, O. Kitao, H. Nakai, T. Vreven, J. A. Montgomery, Jr., J. E. Peralta, F. Ogliaro, M. Bearpark, J. J. Heyd, E. Brothers, K. N. Kudin, V. N. Staroverov, T. Keith, R. Kobayashi, J. Normand, K. Raghavachari, A. Rendell, J. C. Burant, S. S. Iyengar, J. Tomasi, M. Cossi, N. Rega, J. M. Millam, M. Klene, J. E. Knox, J. B. Cross, V. Bakken, C. Adamo, J. Jaramillo, R. Gomperts, R. E. Stratmann, O. Yazyev, A. J. Austin, R. Cammi, C. Pomelli, J. W. Ochterski, R. L. Martin, K. Morokuma, V. G. Zakrzewski, G. A. Voth, P. Salvador, J. J. Dannenberg, S. Dapprich, A. D. Daniels, O. Farkas, J. B. Foresman, J. V. Ortiz, J. Cioslowski and D. J. Fox, Gaussian 09, Revision E.01, Gaussian, Inc.: Wallingford CT, 2013.

- [S7] (a) C. Lee, W. Yang, R. G. Parr, *Phys. Rev. B: Condens. Matter Mater. Phys.*, 1988, **37**, 785; (b) A. D. Becke, *J. Chem. Phys.*, 1993, **98**, 5648.
- [S8] (a) W. R. Wadt, P. J. Hay, *J. Chem. Phys.*, 1985, **82**, 284; (b) P. J. Hay, W. R. Wadt, *J. Chem. Phys.*, 1985, **82**, 299.
- [S9] (a) C. Gonzalez, H. B. Schlegel, *J. Chem. Phys.*, 1989, **90**, 2154; (b) C. Gonzalez, H. B. Schlegel, *J. Phys. Chem.*, 1990, **94**, 5523.
- [S10] A. V. Marenich, C. J. Cramer, D. G. Truhlar, *J. Phys. Chem. B*, 2009, **113**, 6378.
- [S11] S. Grimme, J. Antony, S. Ehrlich, H. Krieg, *J. Chem. Phys.*, 2010, **132**, 154104.
- [S12] D. Andrae, U. Häußermann, M. Dolg, H. Stoll, H. Preuß, *Theor. Chim. Acta*, 1990, **77**, 123.
- [S13] C. Y. Legault, CYLview, 1.0b; Université de Sherbrooke, 2009 (<http://www.cylview.org>).

## VII. Copies of $^1\text{H}$ and $^{13}\text{C}$ NMR Spectra

**3a**- $^1\text{H}$  NMR (400 MHz,  $\text{CDCl}_3$ )

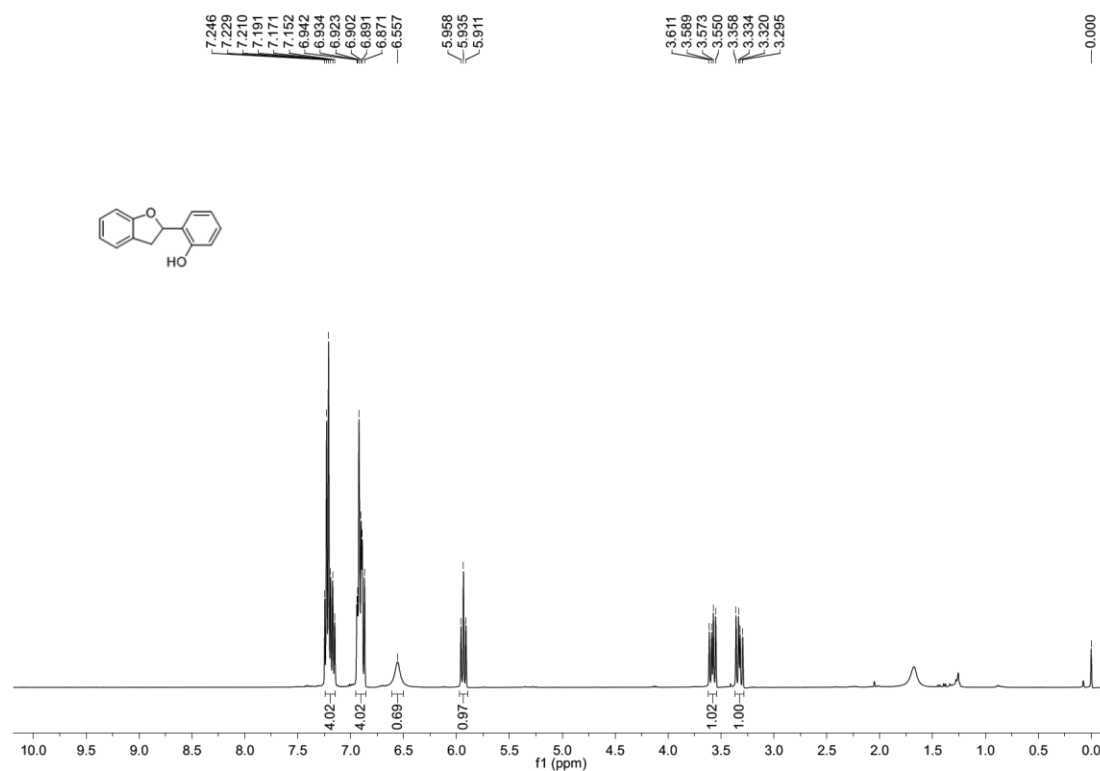

**3a**- $^{13}\text{C}$  NMR (100 MHz,  $\text{CDCl}_3$ )

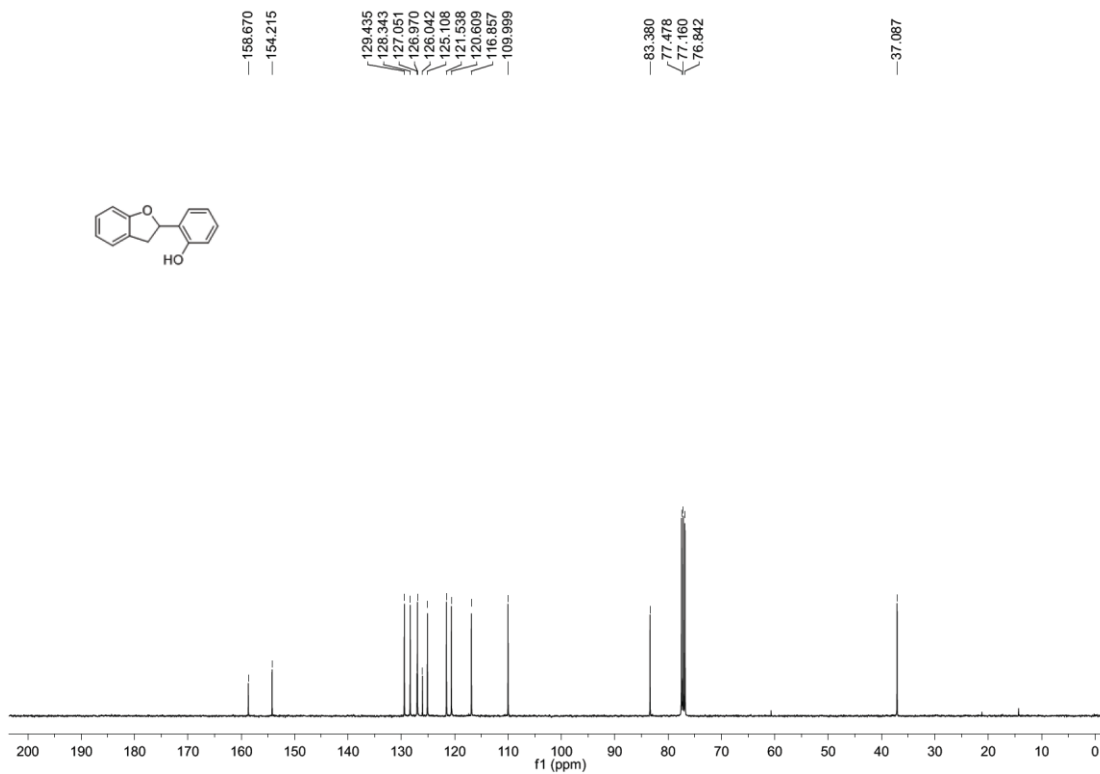

**3b**-<sup>1</sup>H NMR (400 MHz, CDCl<sub>3</sub>)

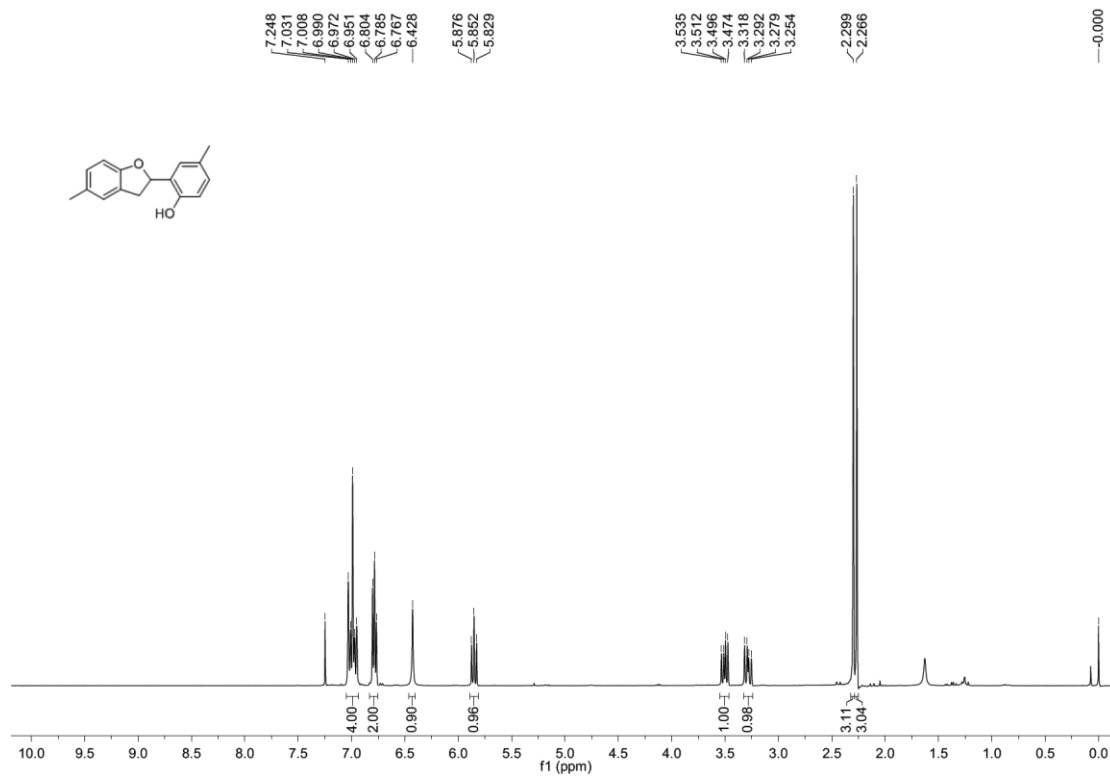

**3b**-<sup>13</sup>C NMR (100 MHz, CDCl<sub>3</sub>)

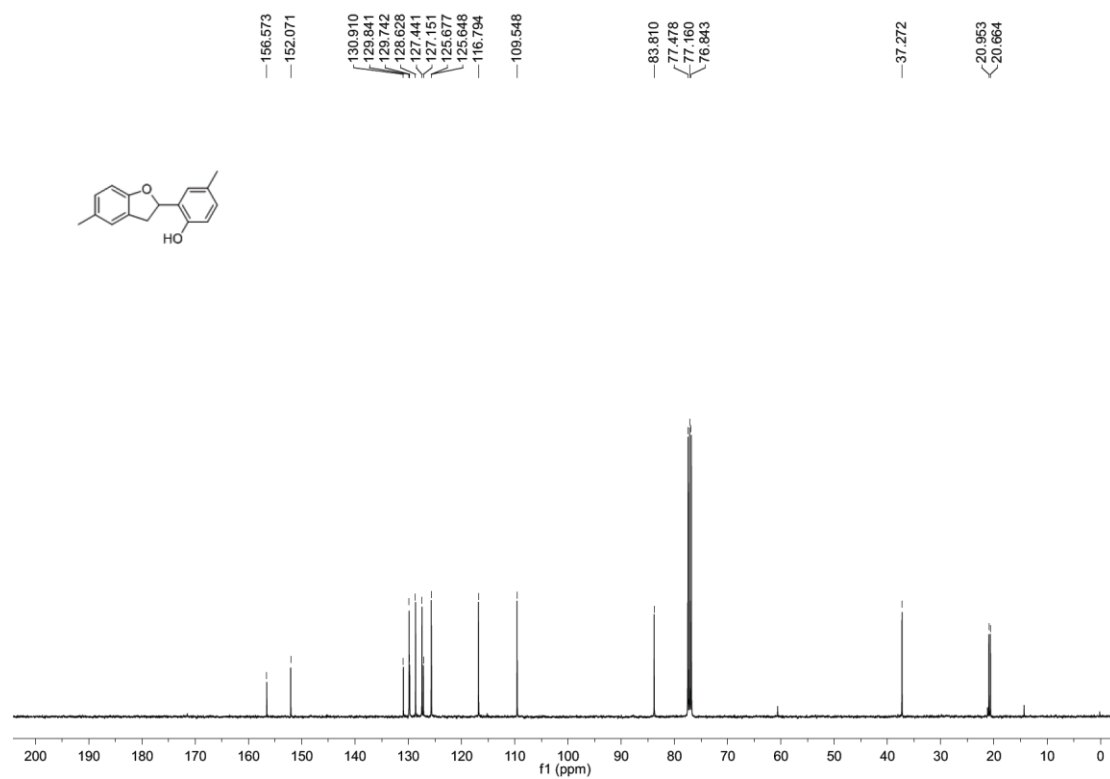

**3c-<sup>1</sup>H NMR (400 MHz, CDCl<sub>3</sub>)**

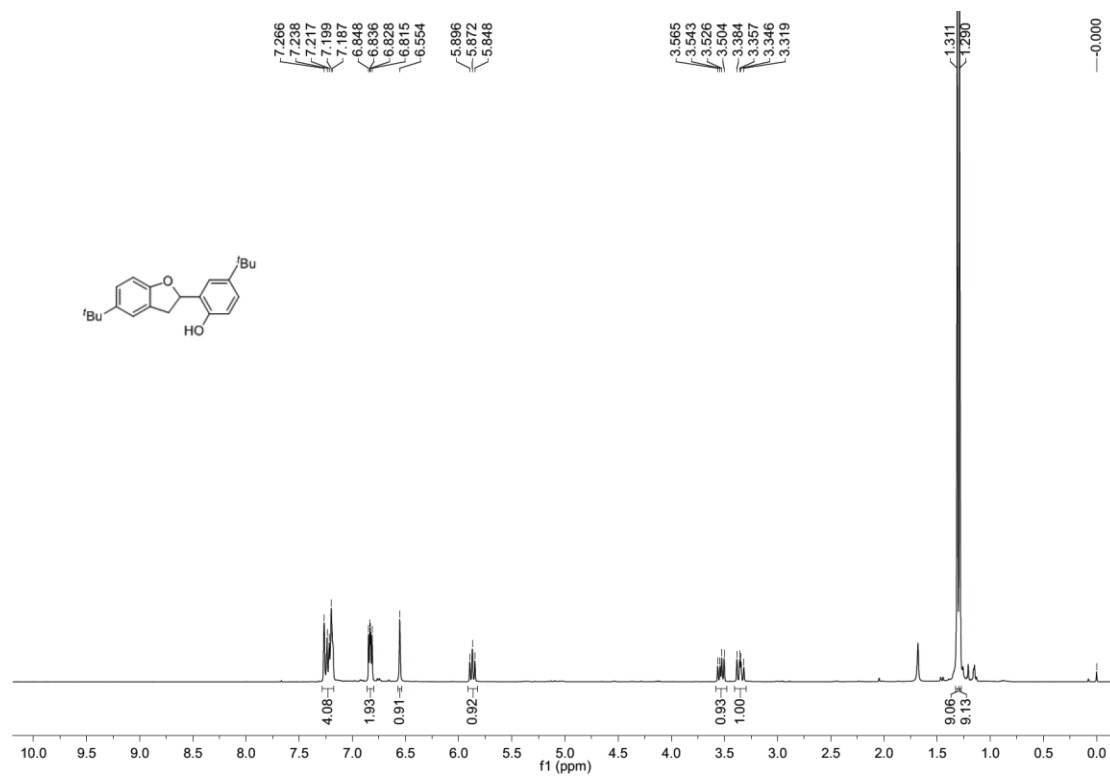

**3c-<sup>13</sup>C NMR (100 MHz, CDCl<sub>3</sub>)**

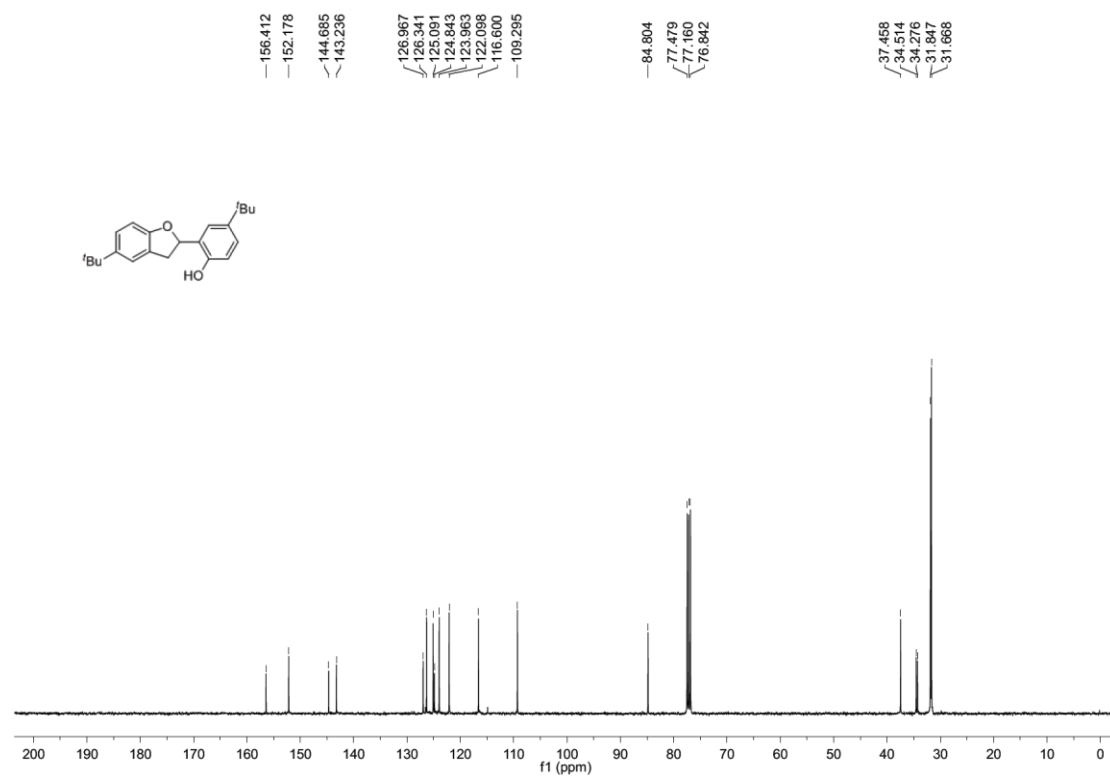

**3d-<sup>1</sup>H NMR (400 MHz, CDCl<sub>3</sub>)**

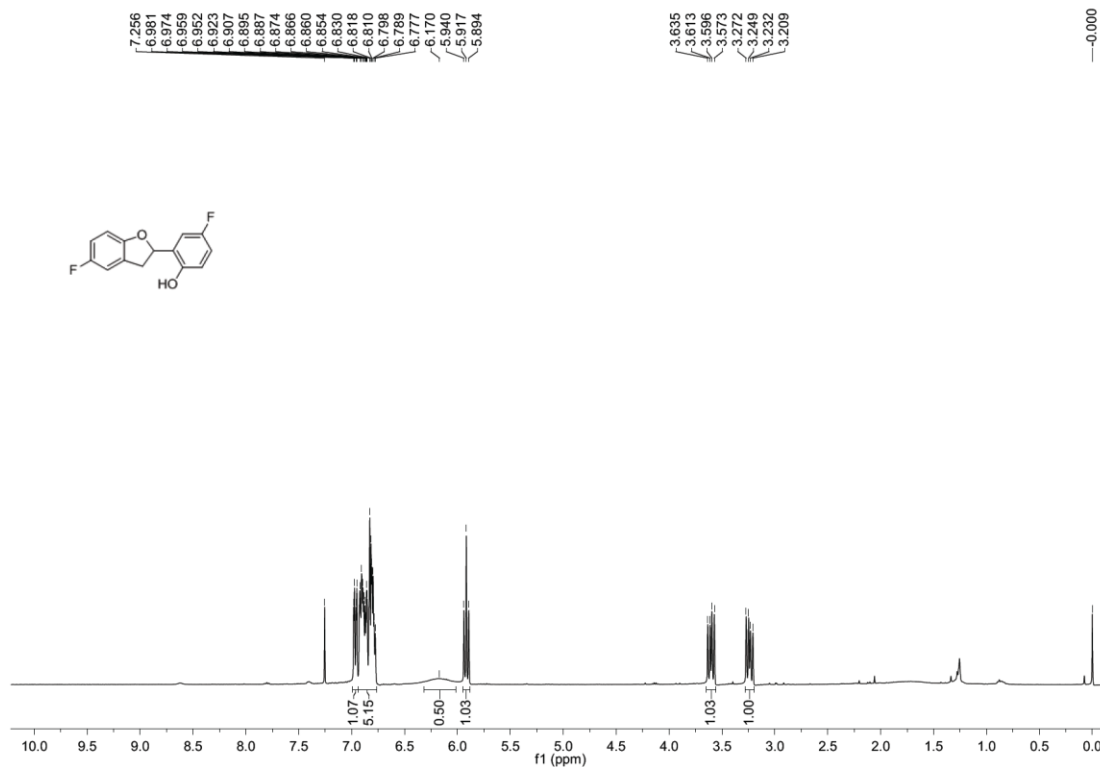

**3d-<sup>13</sup>C NMR (100 MHz, CDCl<sub>3</sub>)**

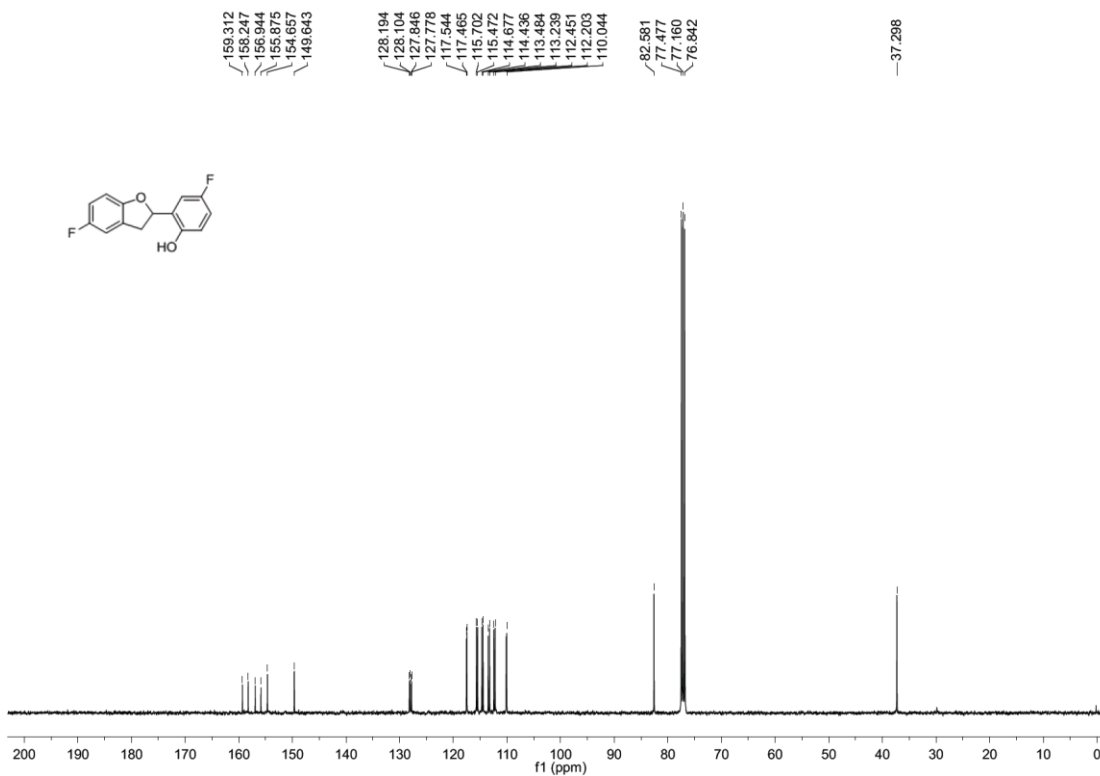



**3d**-<sup>19</sup>F NMR (376 MHz, CDCl<sub>3</sub>)

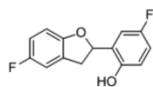

-123.052  
-123.339

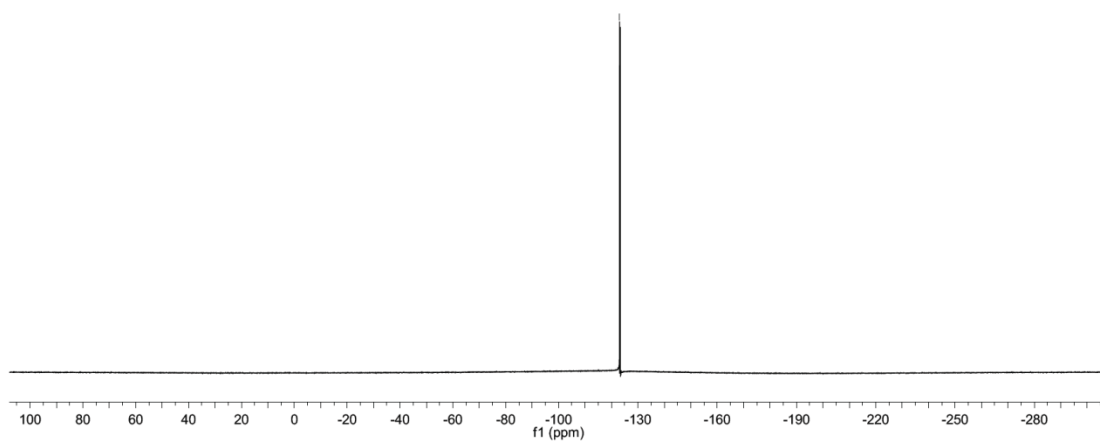

**3e-<sup>1</sup>H NMR (400 MHz, CDCl<sub>3</sub>)**

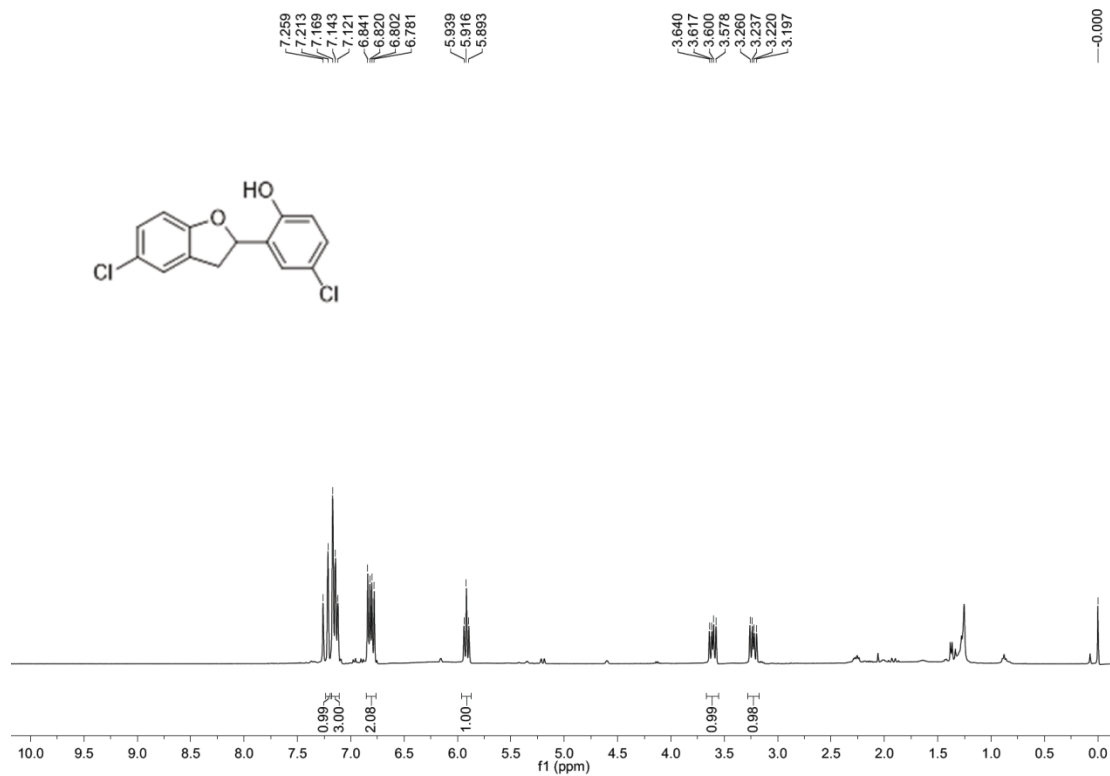

**3e-<sup>13</sup>C NMR (100 MHz, CDCl<sub>3</sub>)**

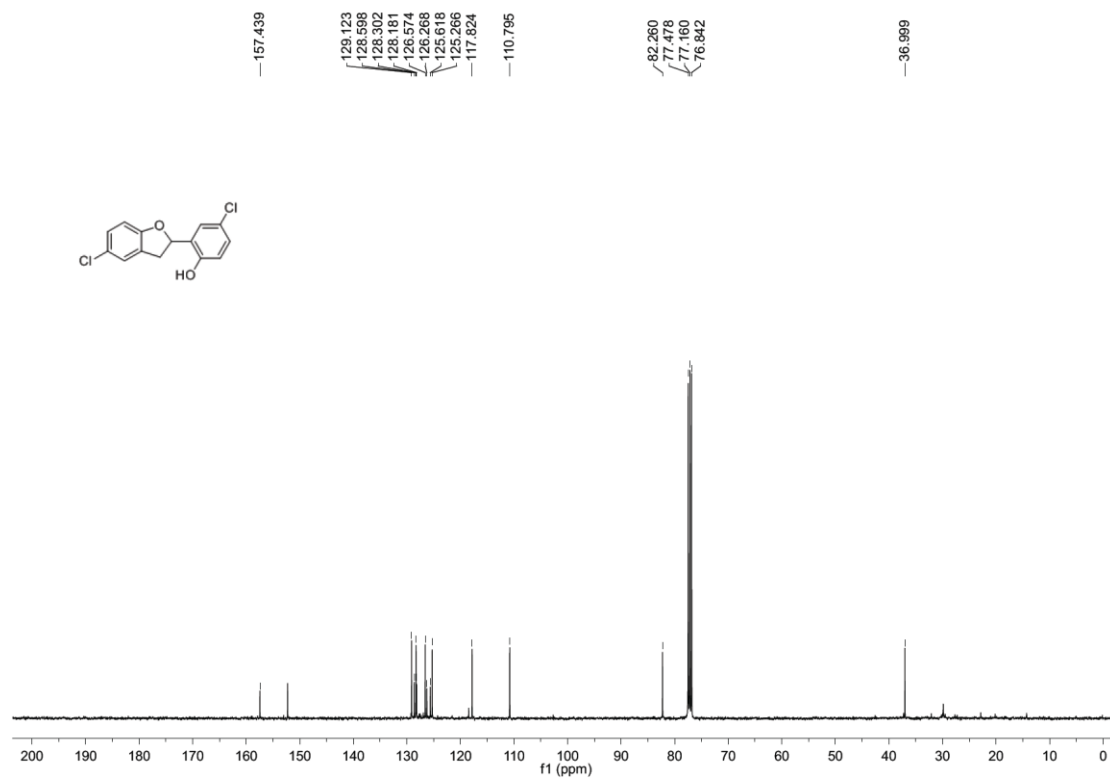

**3f**-<sup>1</sup>H NMR (400 MHz, CDCl<sub>3</sub>)

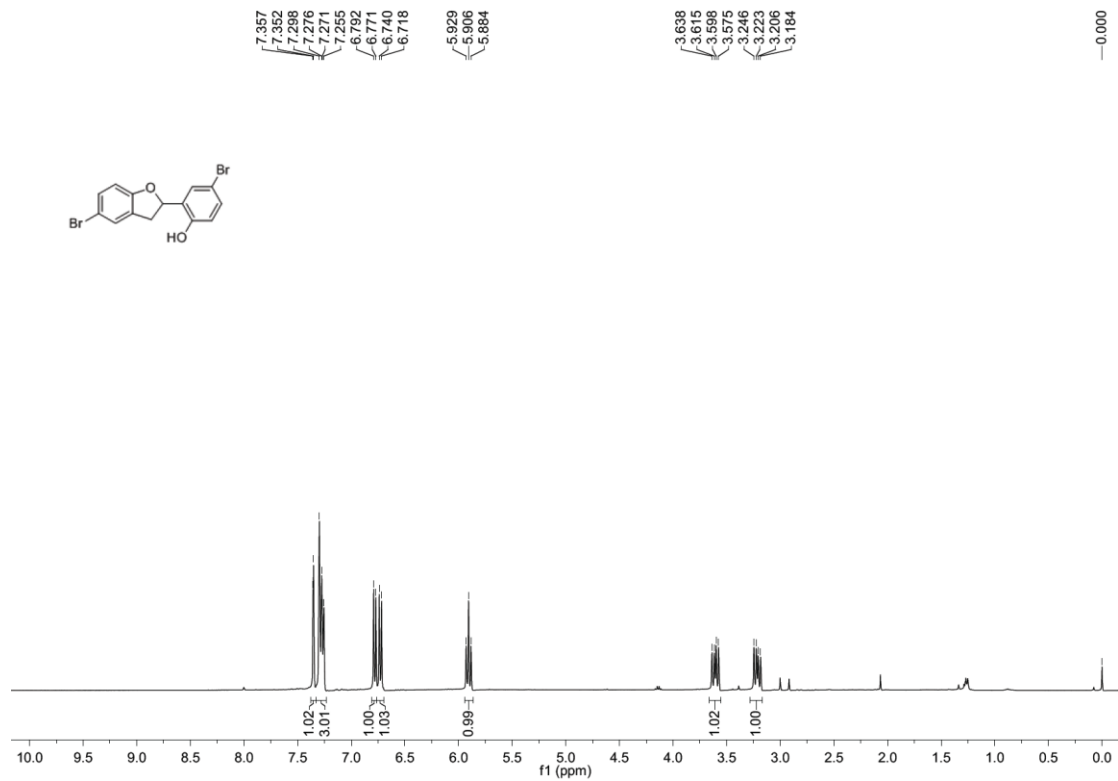

**3f**-<sup>13</sup>C NMR (100 MHz, CDCl<sub>3</sub>)

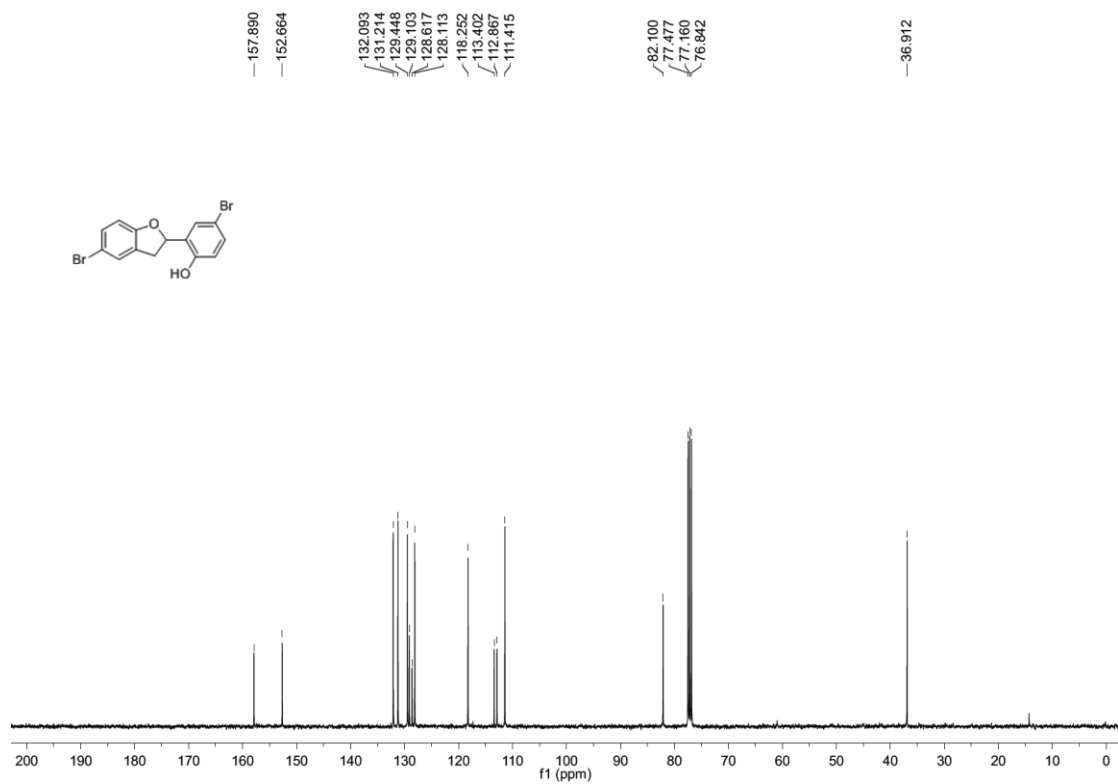

**3g**-<sup>1</sup>H NMR (400 MHz, CDCl<sub>3</sub>)

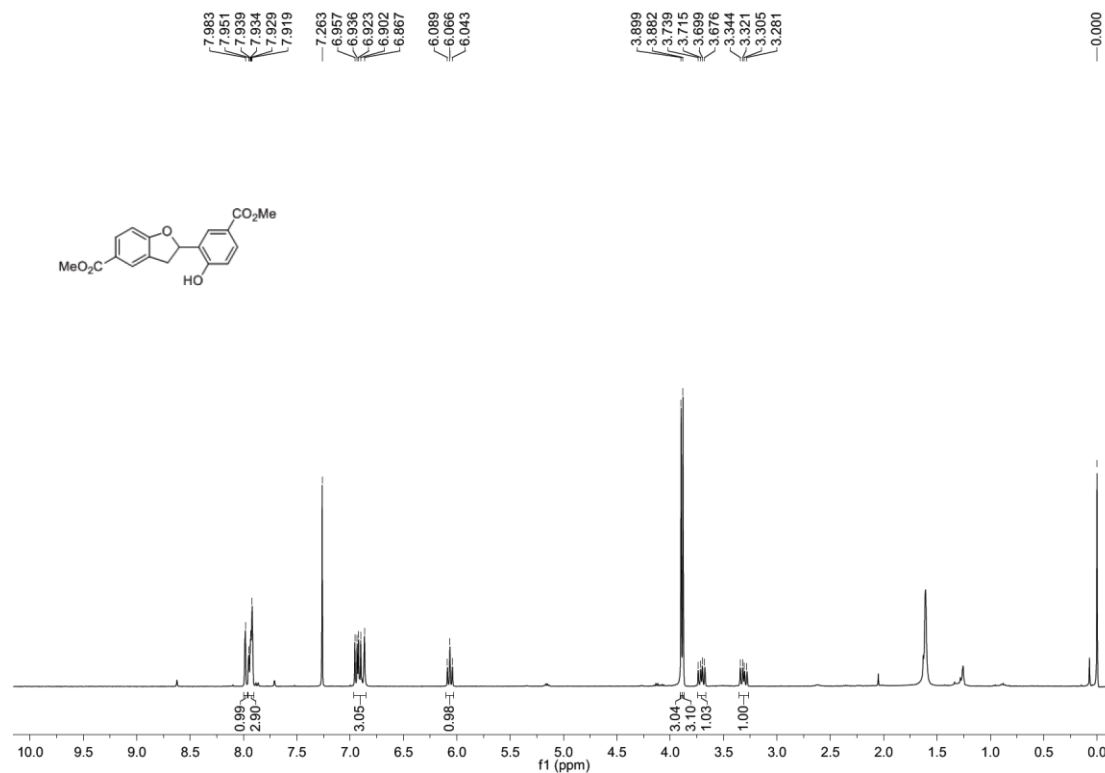

**3g**-<sup>13</sup>C NMR (100 MHz, DMSO-*d*<sub>6</sub>)

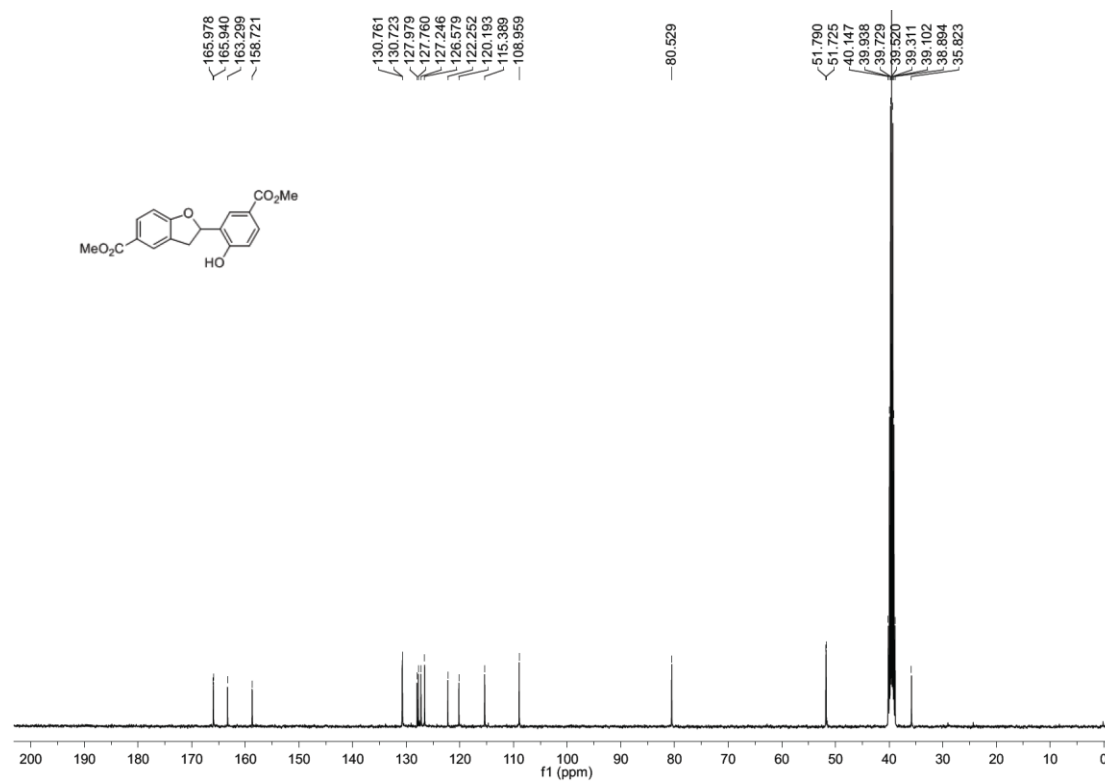

**3h**-<sup>1</sup>H NMR (400 MHz, DMSO-*d*<sub>6</sub>)

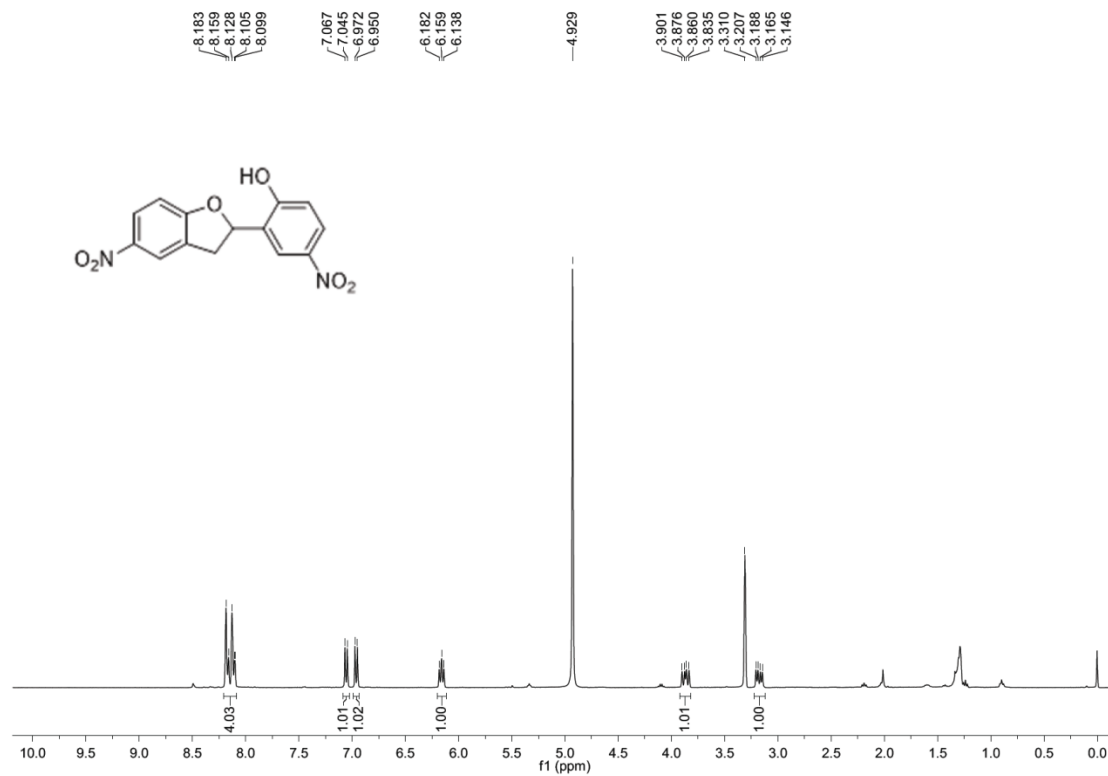

**3h**-<sup>13</sup>C NMR (100 MHz, DMSO-*d*<sub>6</sub>)

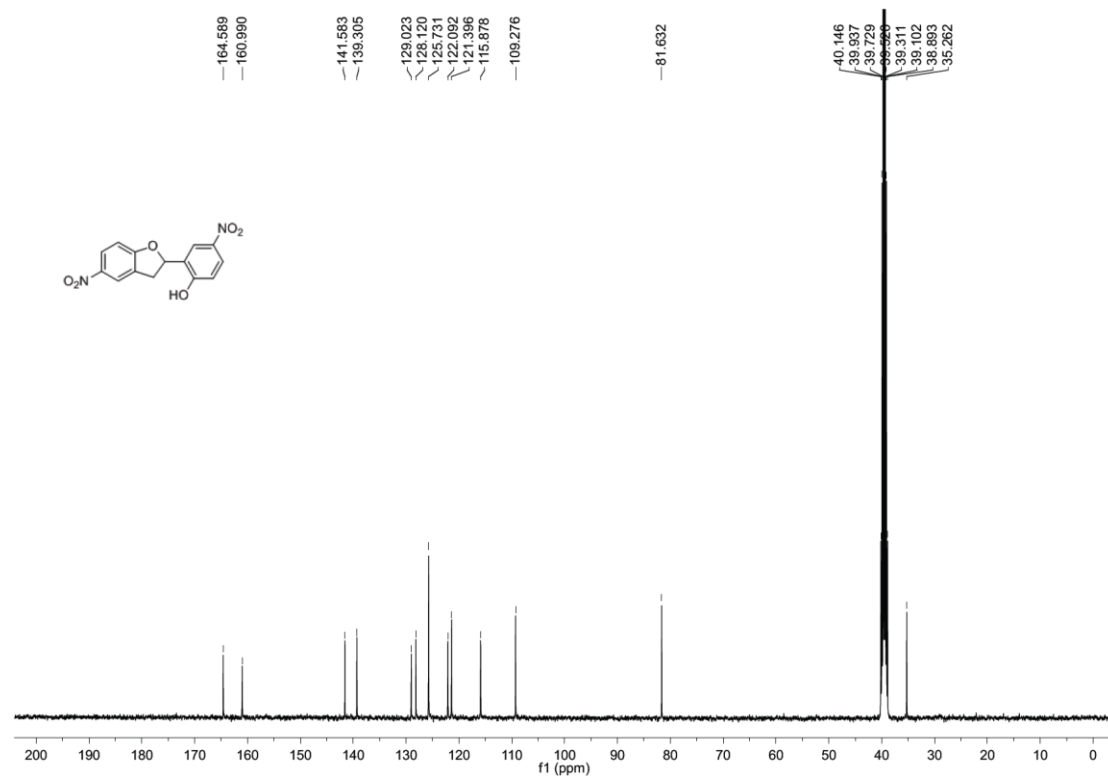

**3i-<sup>1</sup>H NMR (400 MHz, CD<sub>3</sub>OD)**

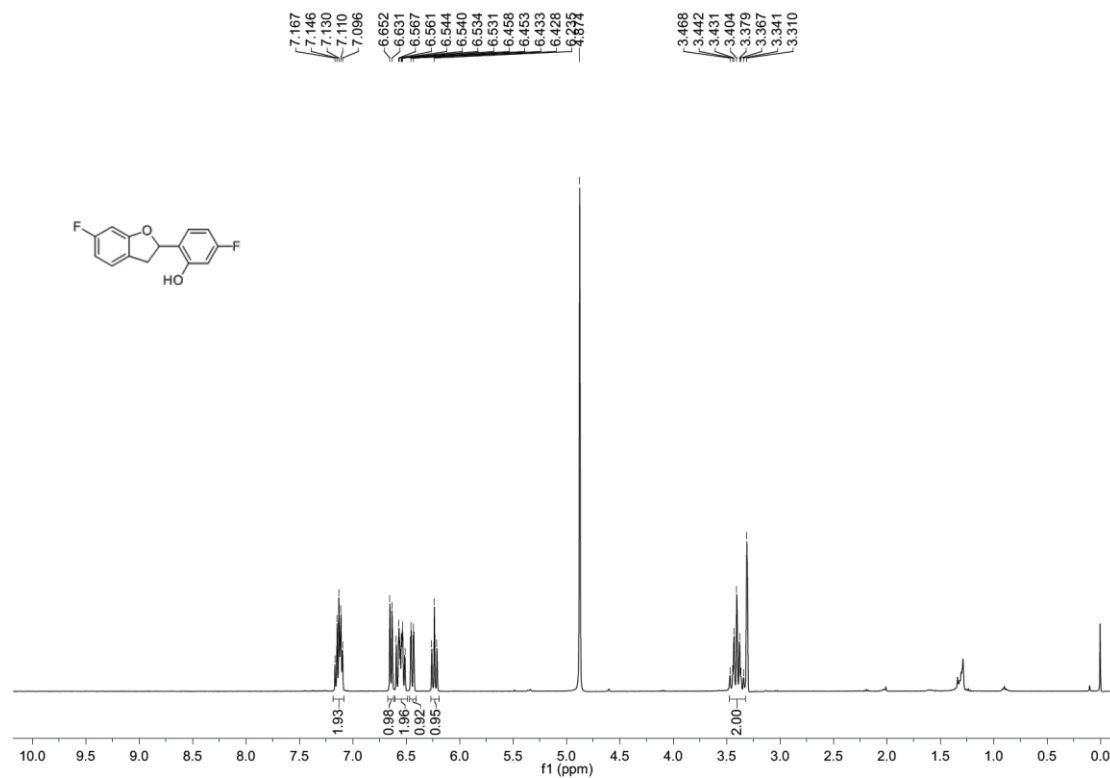

**3i-<sup>13</sup>C NMR (100 MHz, CDCl<sub>3</sub>)**

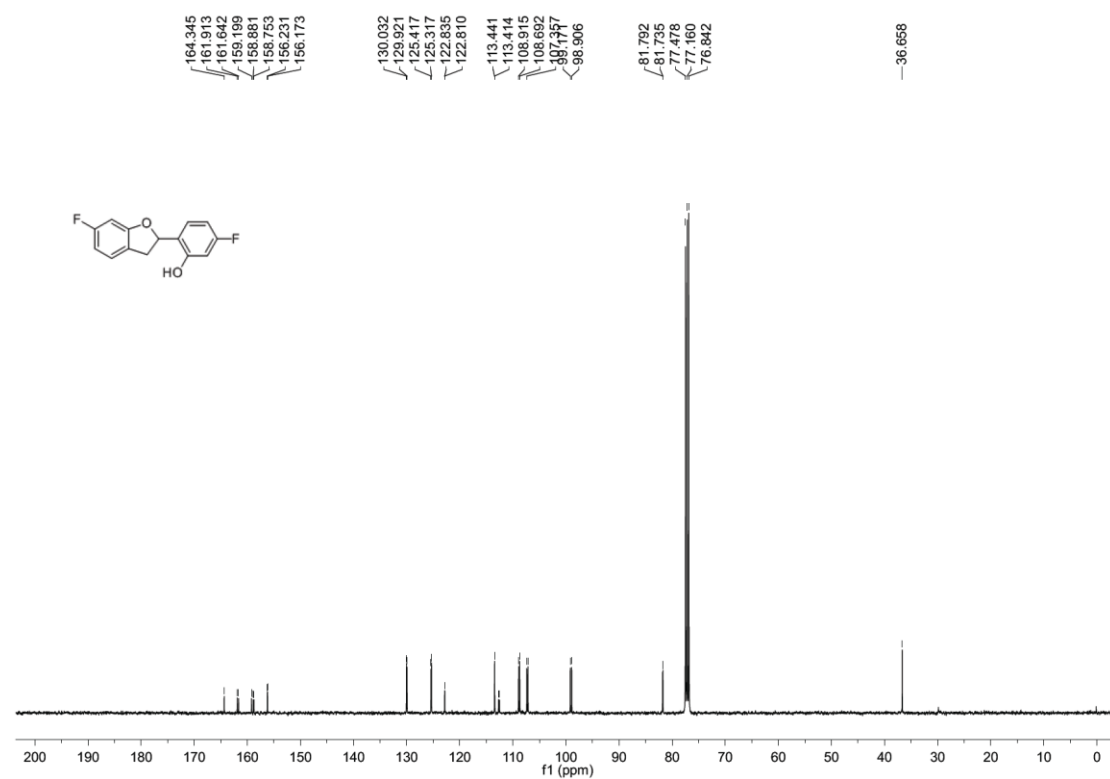

**3i-**  $^{19}\text{F}$  NMR (376 MHz,  $\text{CDCl}_3$ )

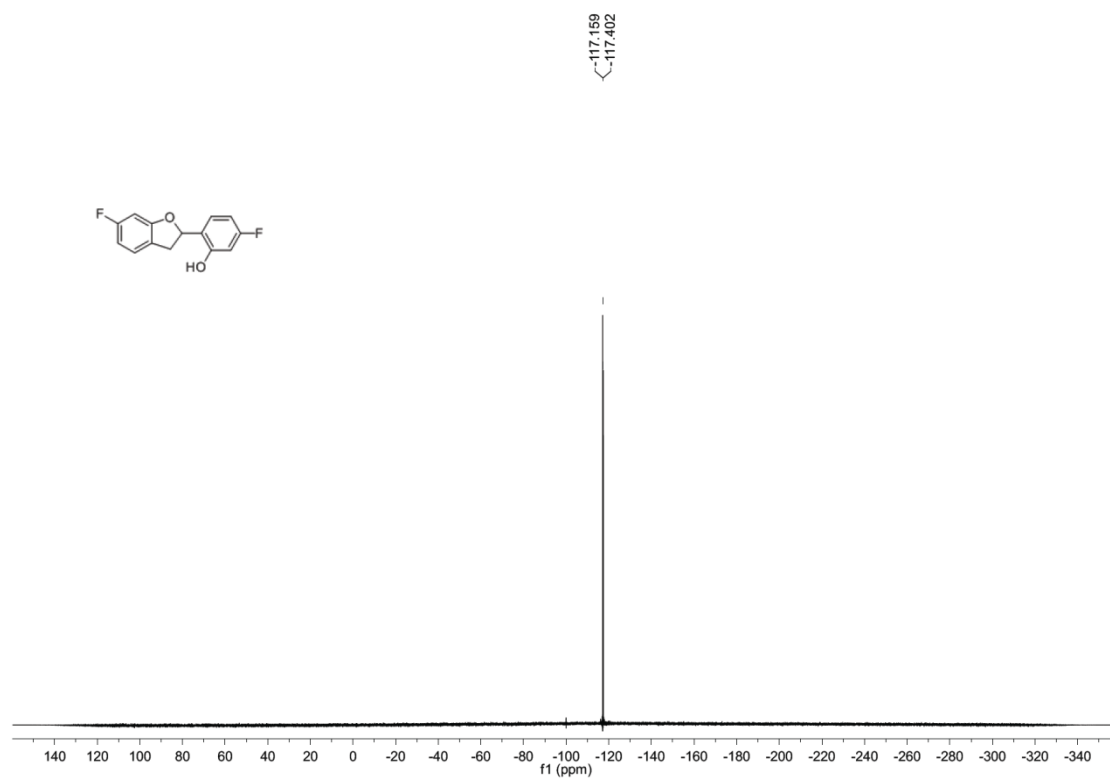

**3j**-<sup>1</sup>H NMR (400 MHz, CDCl<sub>3</sub>)

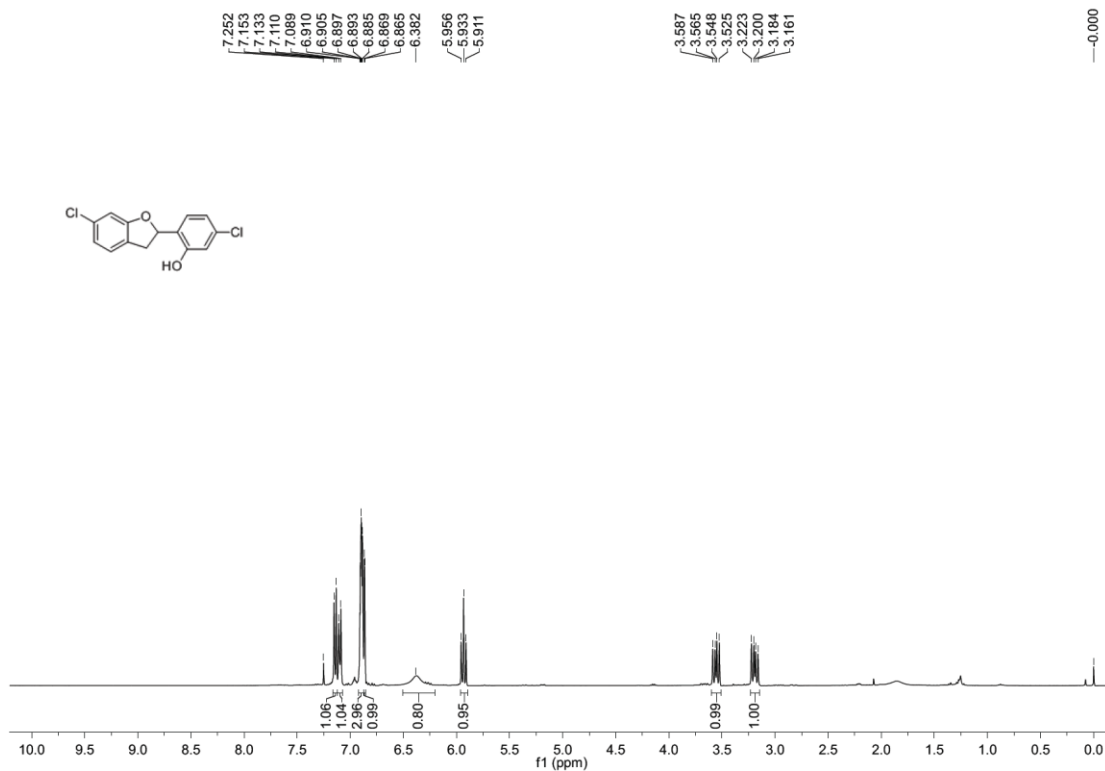

**3j**-<sup>13</sup>C NMR (100 MHz, CDCl<sub>3</sub>)

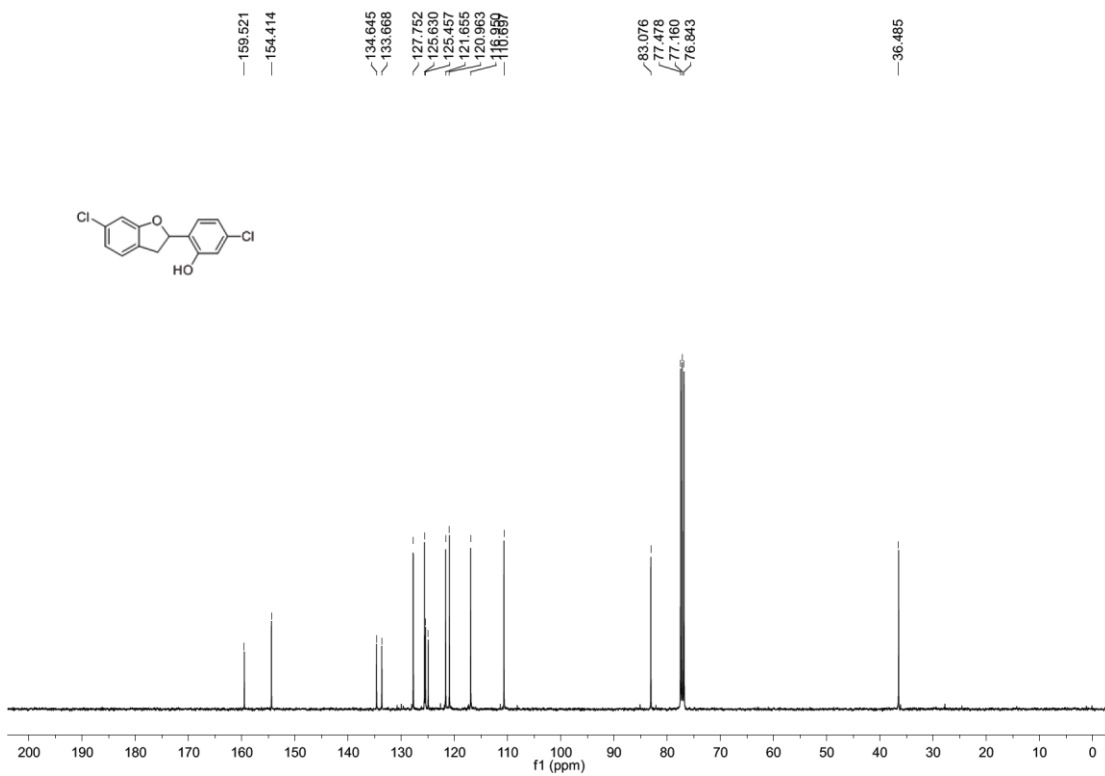



**3k**-<sup>1</sup>H NMR (400 MHz, CDCl<sub>3</sub>)

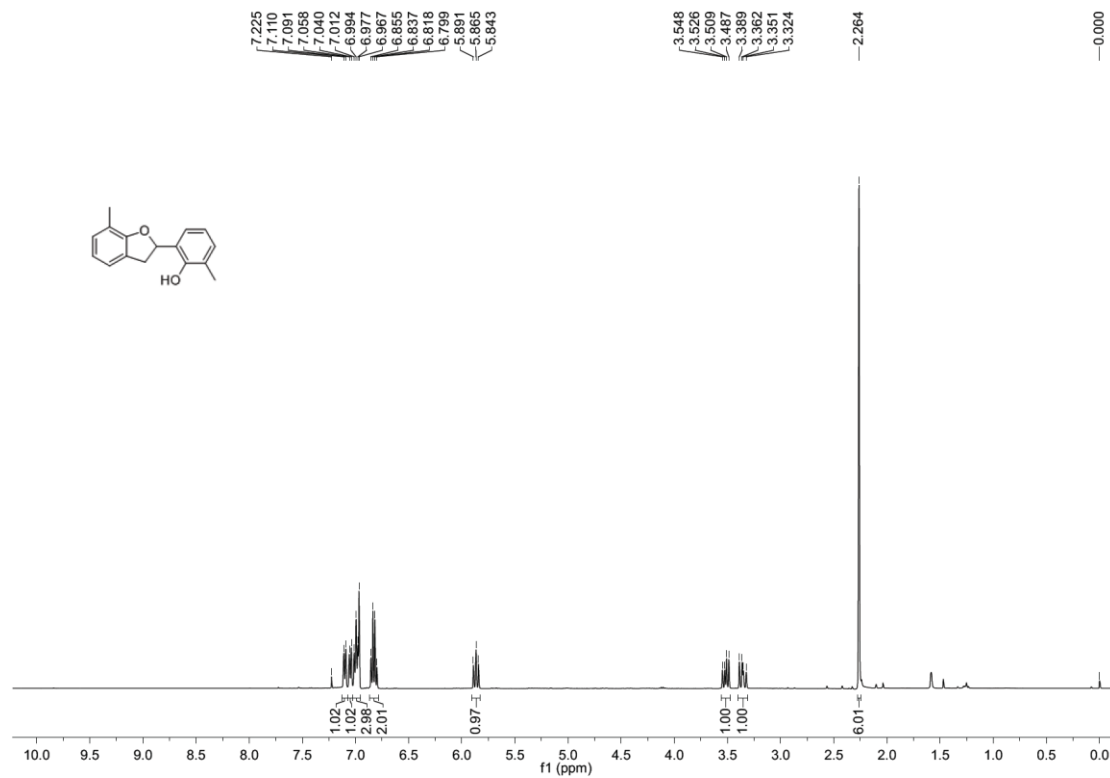

**3k**-<sup>13</sup>C NMR (100 MHz, CDCl<sub>3</sub>)

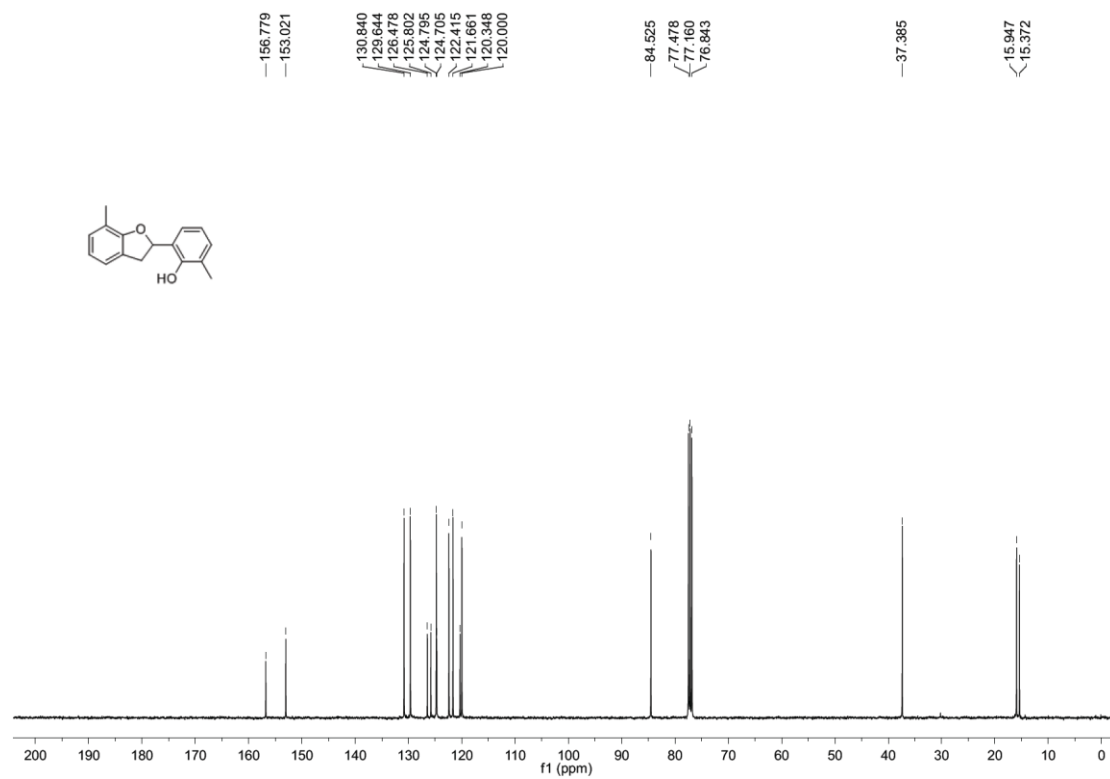

**3I-<sup>1</sup>H NMR (400 MHz, CDCl<sub>3</sub>)**

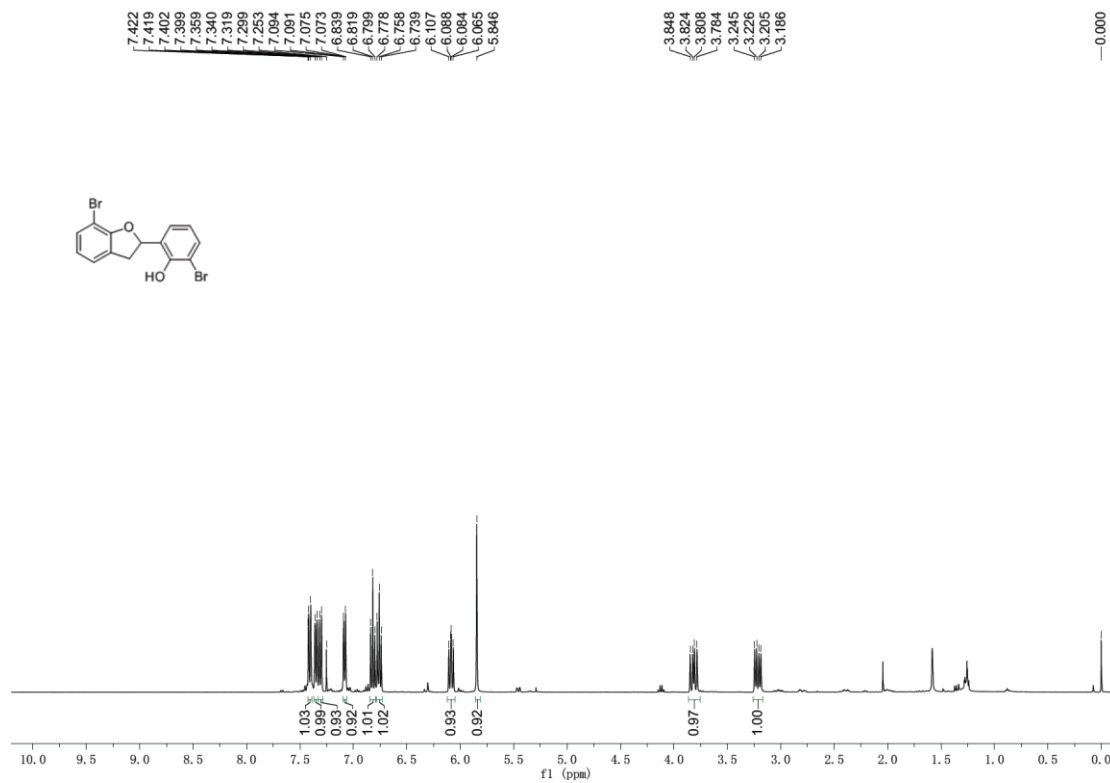

**3I-<sup>13</sup>C NMR (100 MHz, CDCl<sub>3</sub>)**

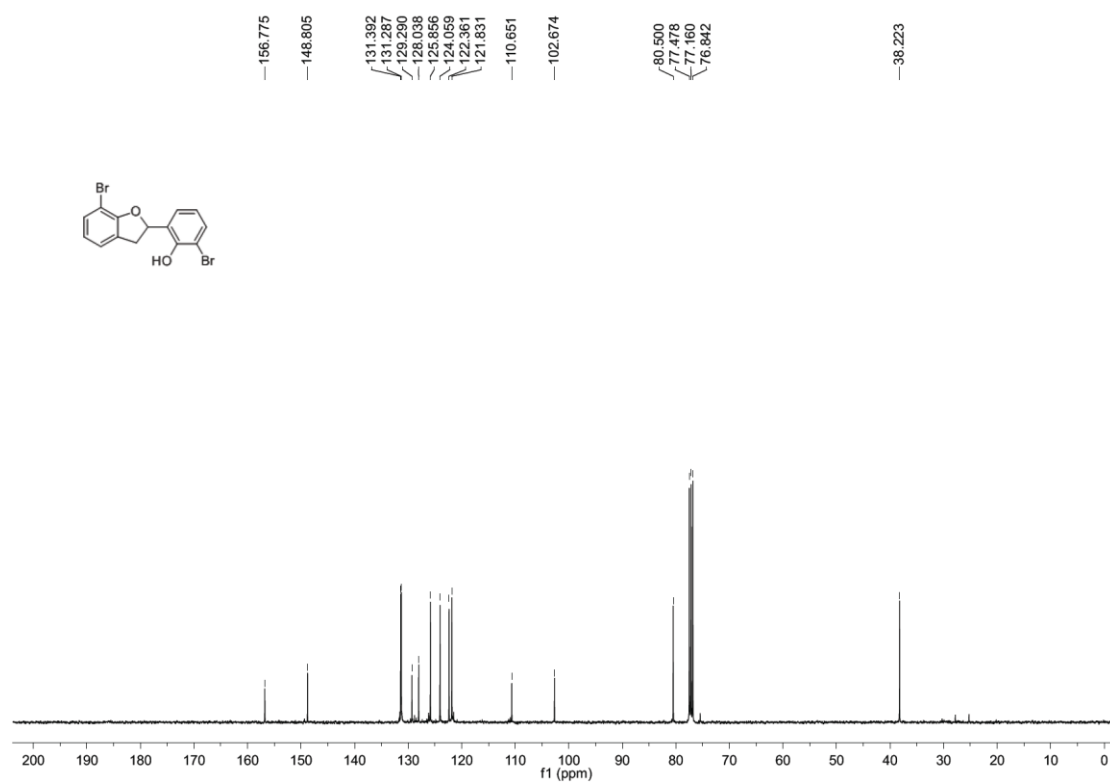

**3m-<sup>1</sup>H NMR (400 MHz, CD<sub>3</sub>OD)**

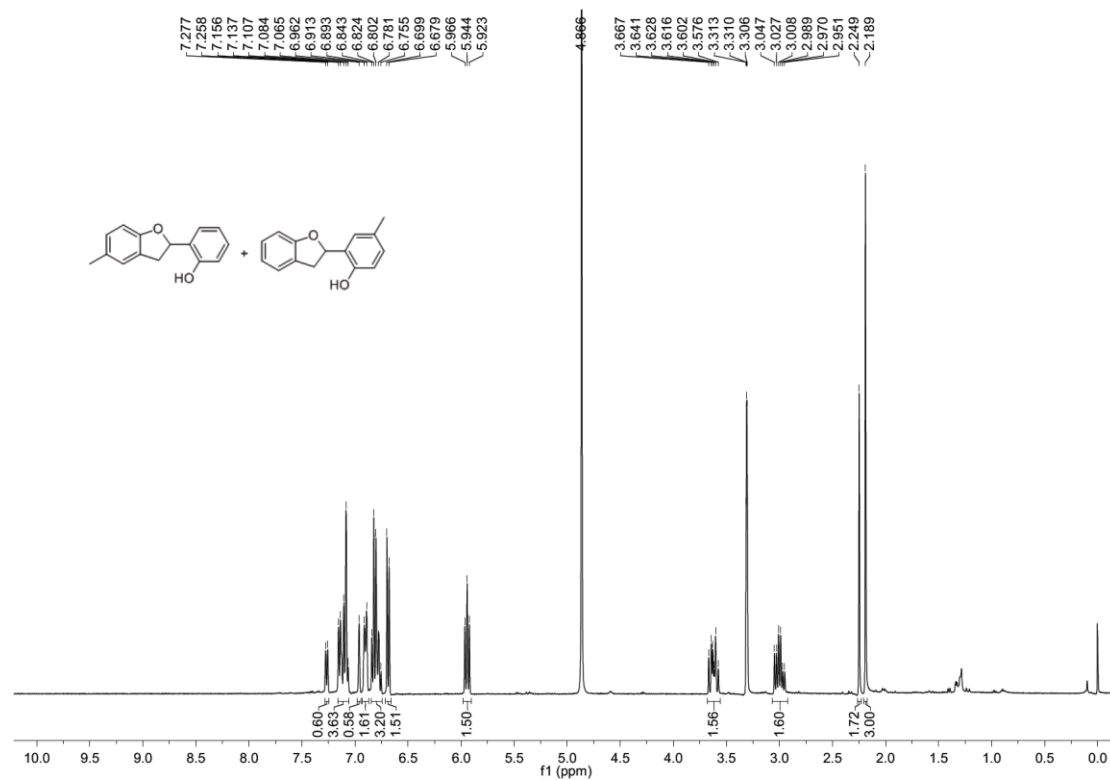

**3m-<sup>13</sup>C NMR (100 MHz, CD<sub>3</sub>OD)**

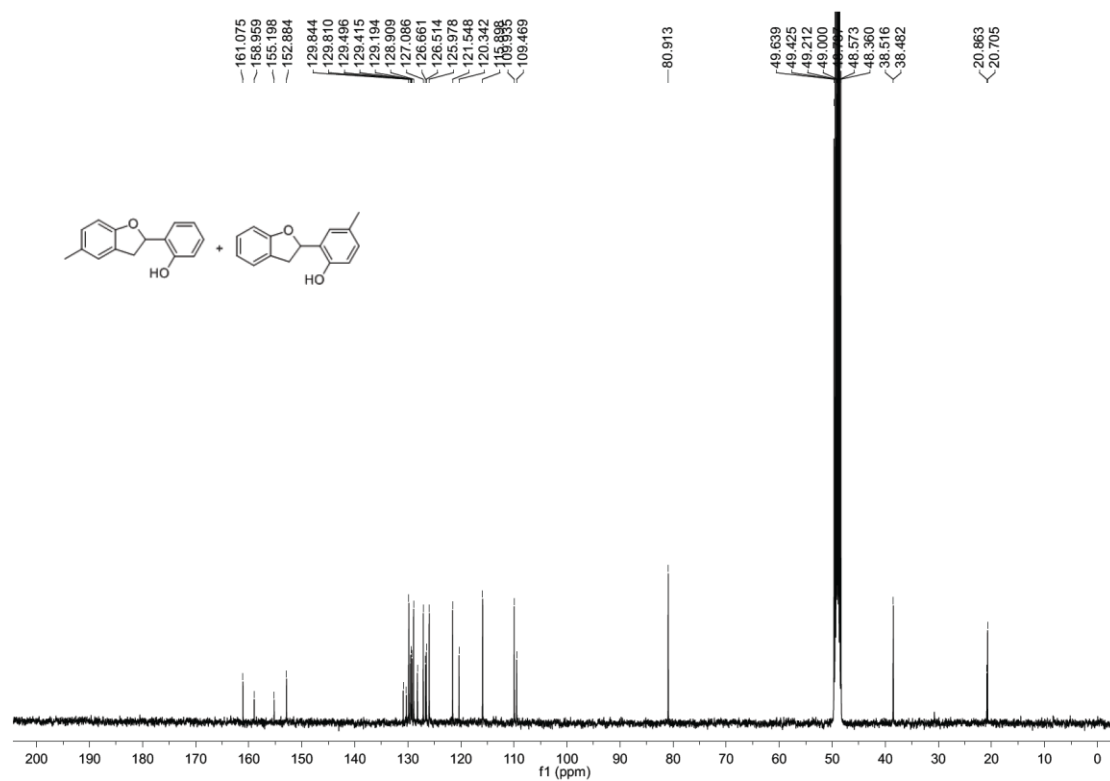

**3n-<sup>1</sup>H NMR (400 MHz, CD<sub>3</sub>OD)**

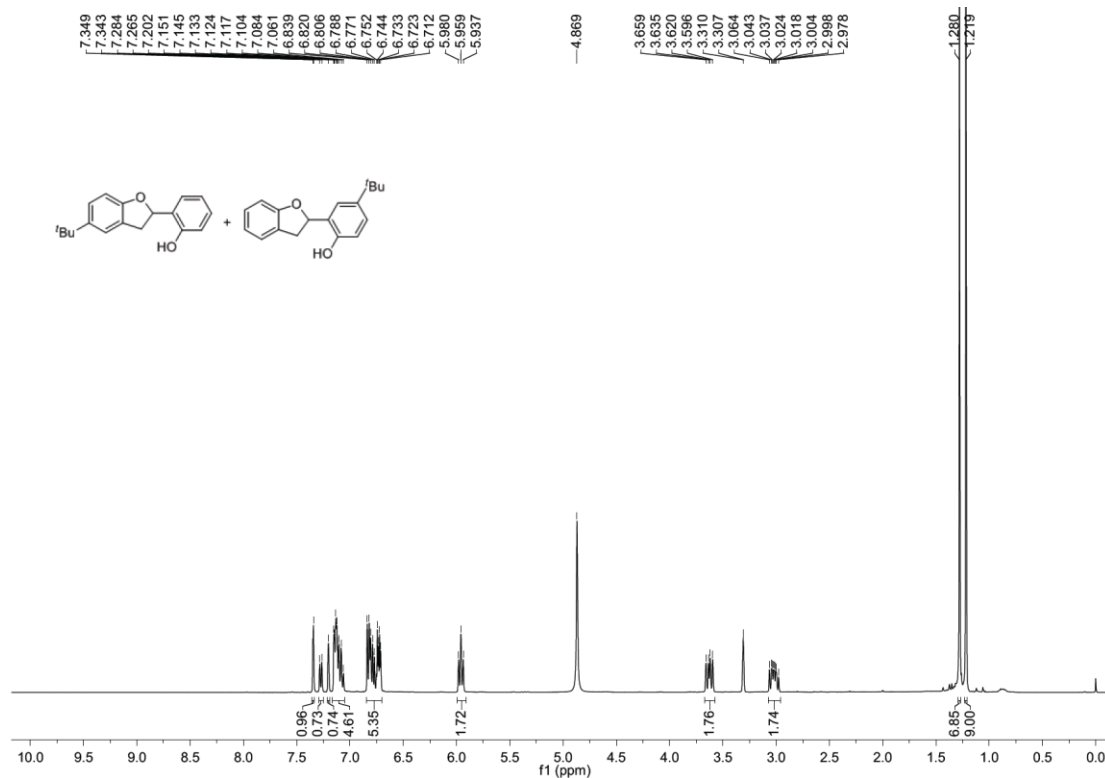

**3n-<sup>13</sup>C NMR (100 MHz, CD<sub>3</sub>OD)**

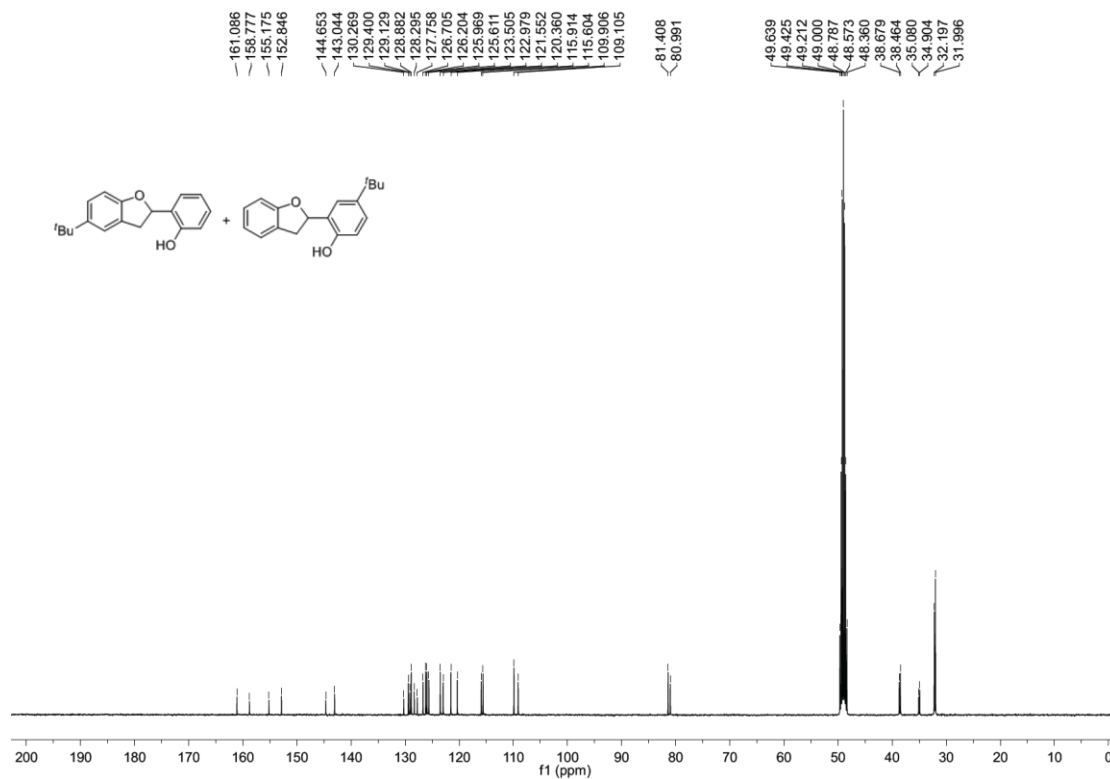

**30-<sup>1</sup>H NMR (400 MHz, CDCl<sub>3</sub>)**

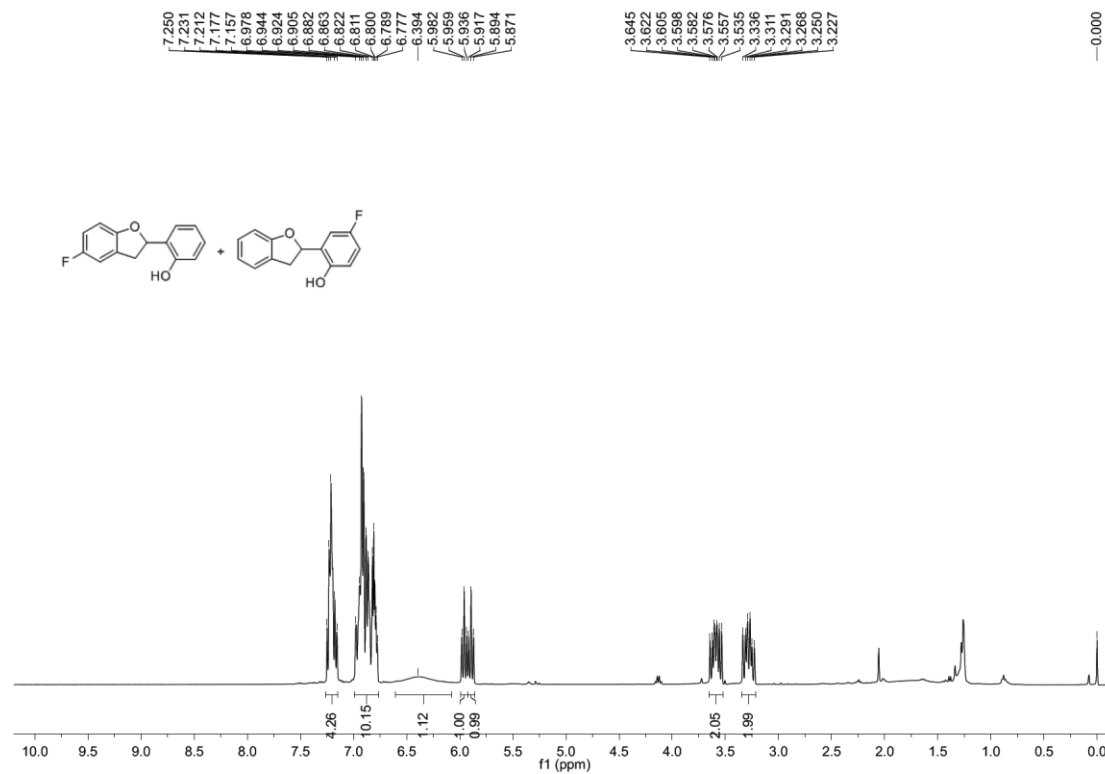

**30-<sup>13</sup>C NMR (100 MHz, CDCl<sub>3</sub>)**

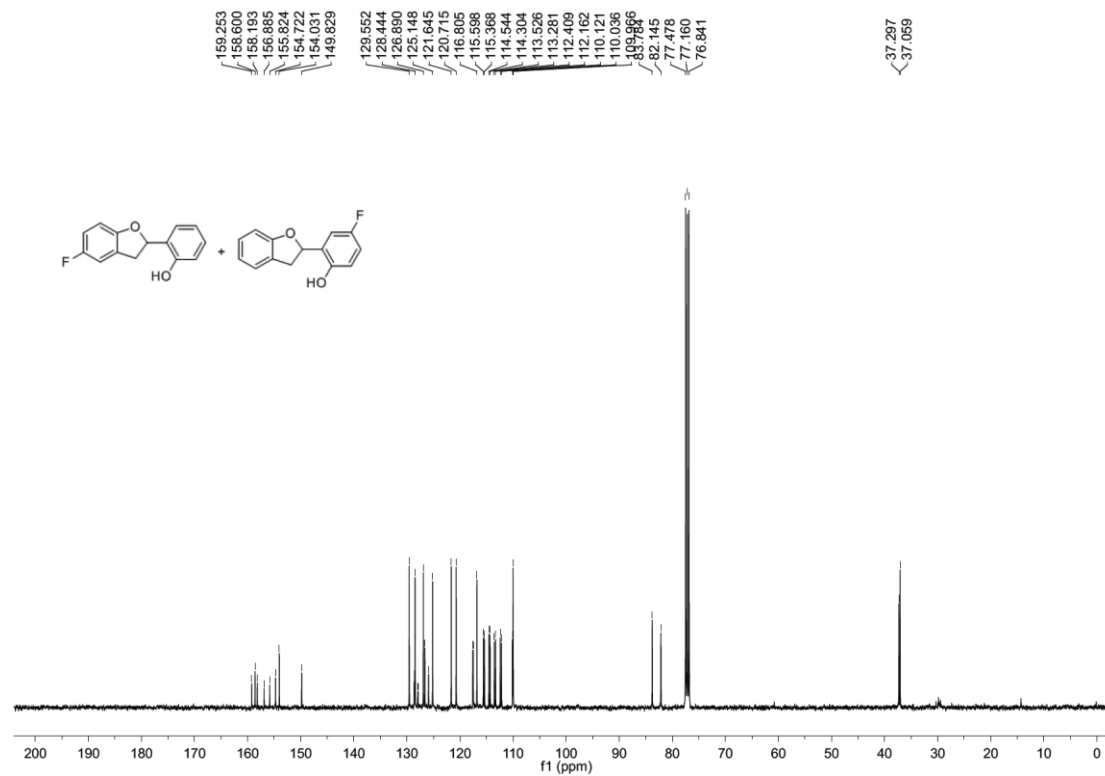

**30**-<sup>19</sup>F NMR (376 MHz, CDCl<sub>3</sub>)

← -123.148  
← -123.484

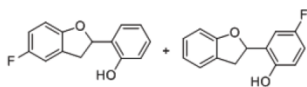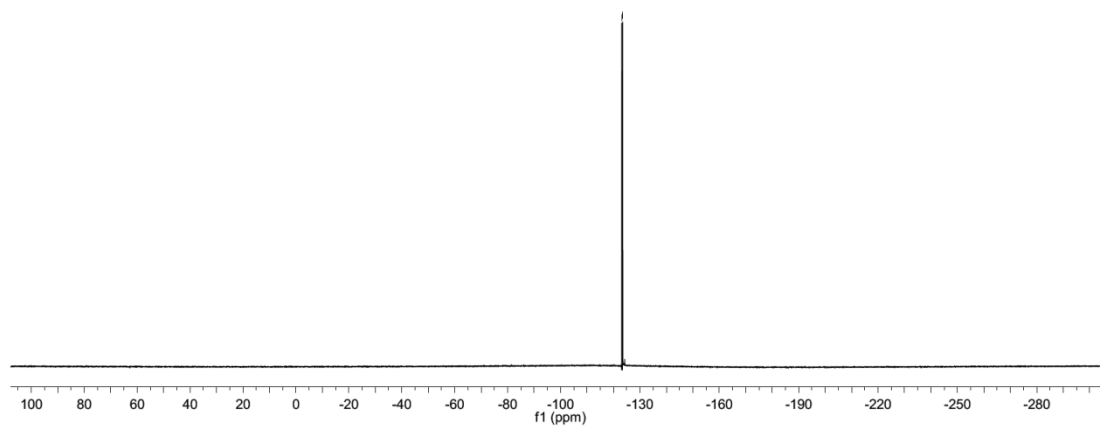

**3p-<sup>1</sup>H NMR (400 MHz, CDCl<sub>3</sub>)**

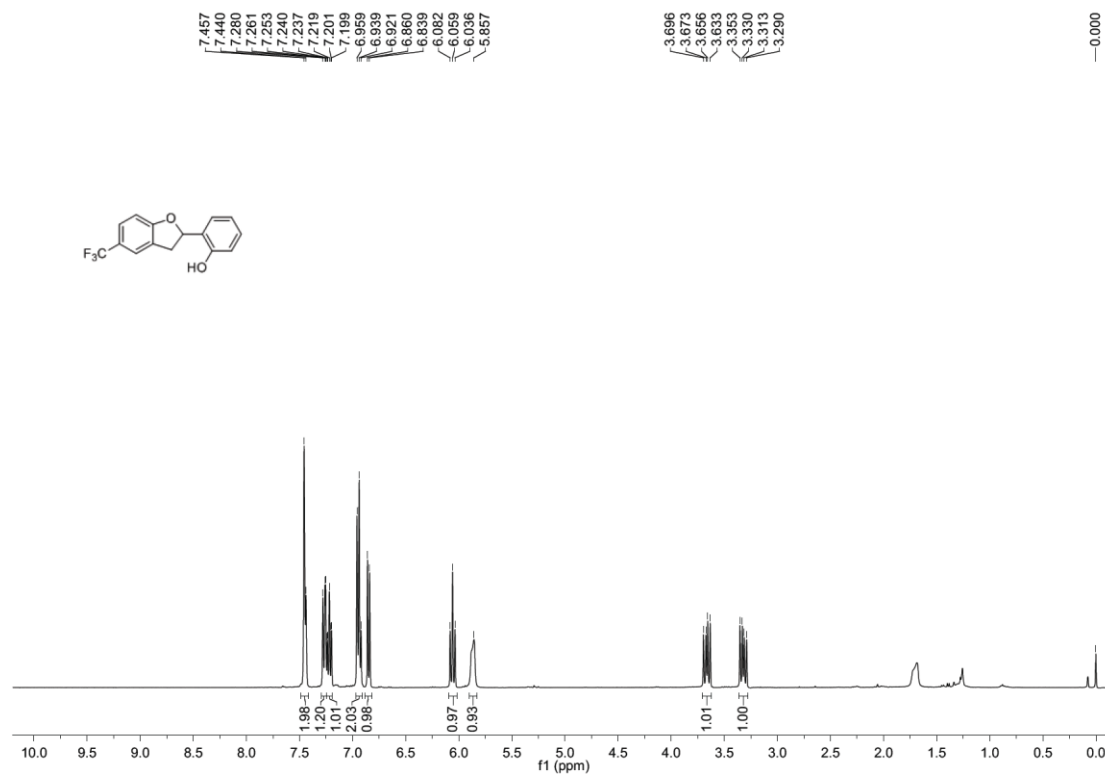

**3p-<sup>13</sup>C NMR (100 MHz, CDCl<sub>3</sub>)**

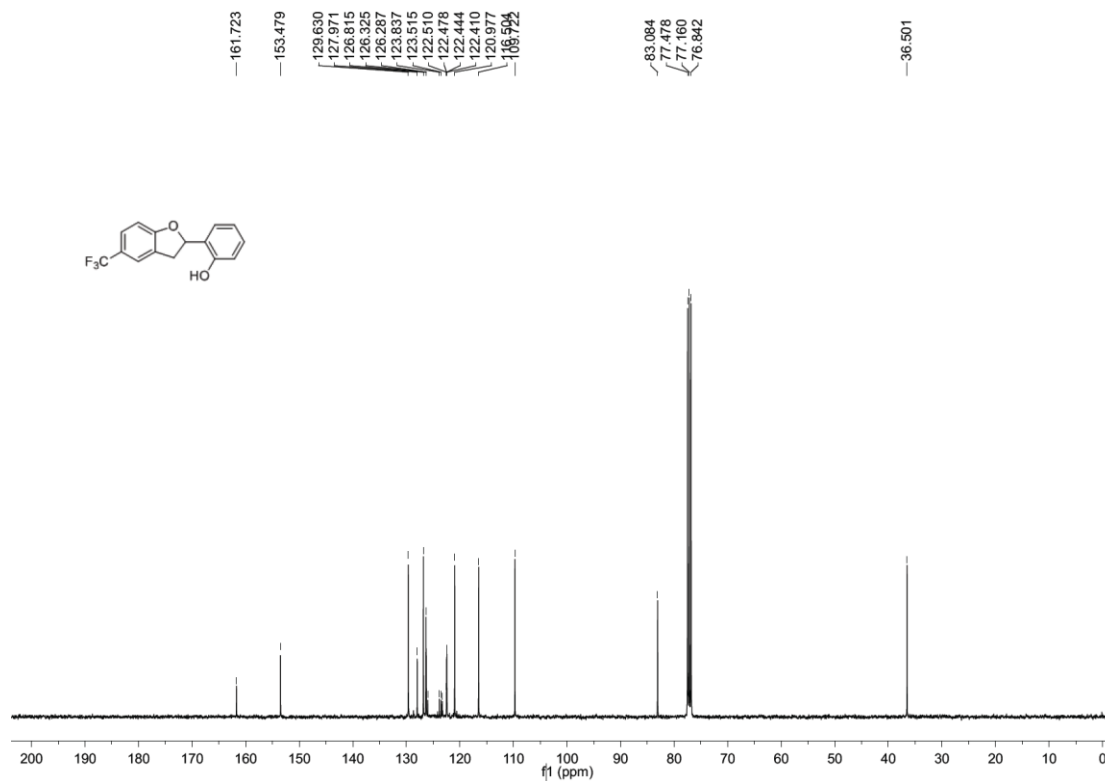

**3p**-<sup>19</sup>F NMR (376 MHz, CDCl<sub>3</sub>)

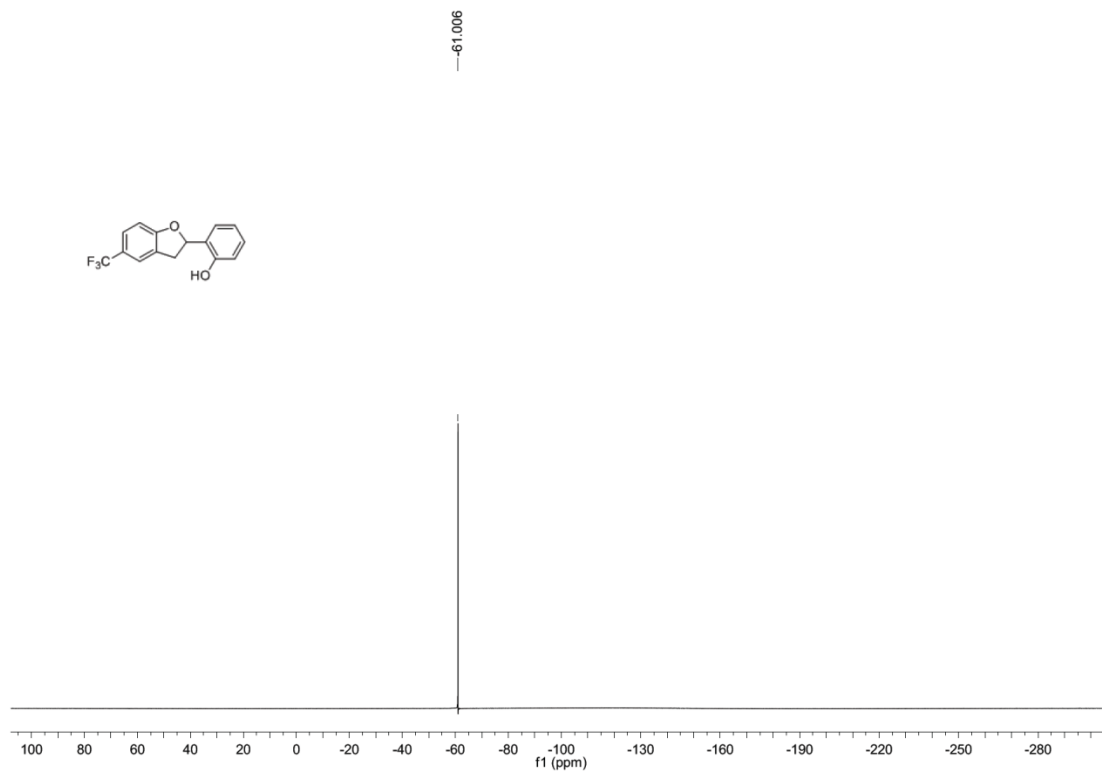



**3p'**-<sup>1</sup>H NMR (400 MHz, CDCl<sub>3</sub>)

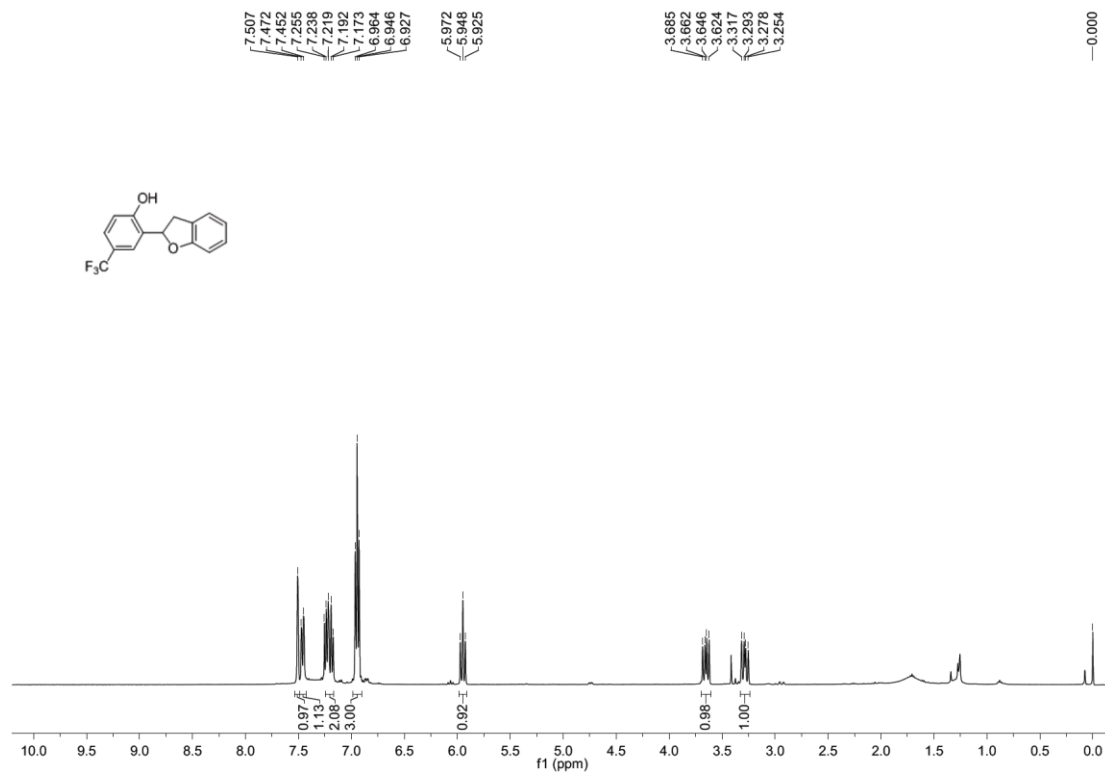

**3p'**-<sup>13</sup>C NMR (100 MHz, CDCl<sub>3</sub>)

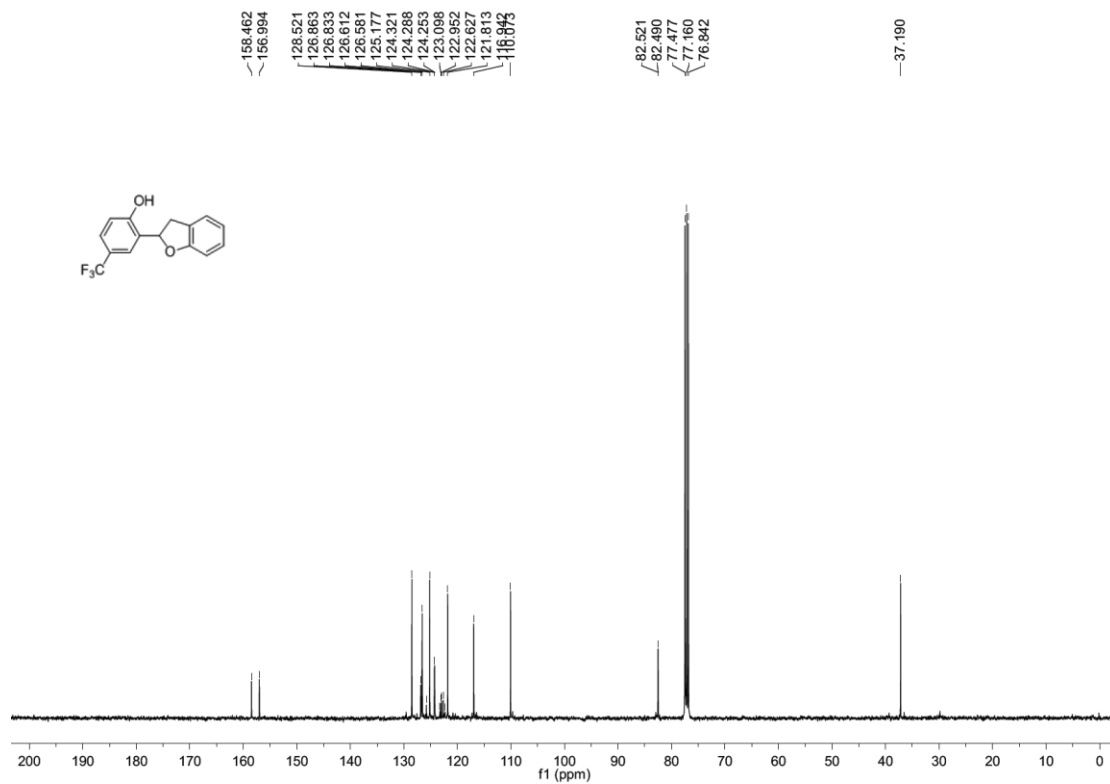

**3p'**-<sup>19</sup>F NMR (376 MHz, CDCl<sub>3</sub>)

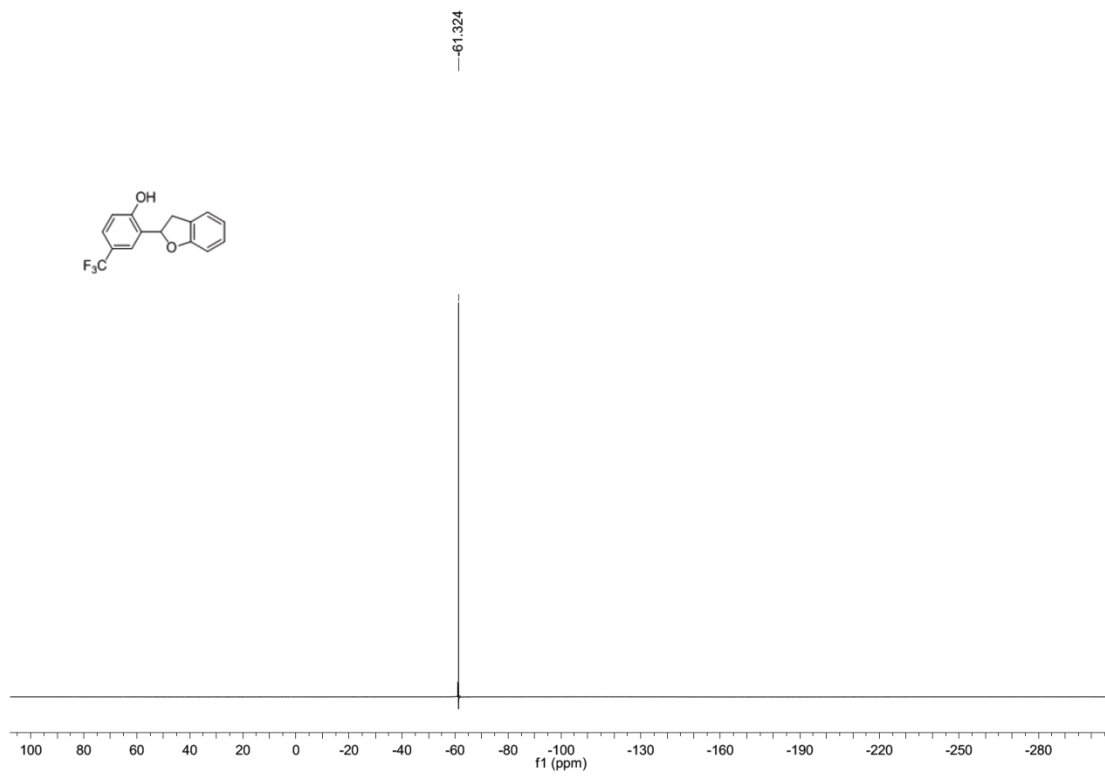

# $^1\text{H}$ - $^1\text{H}$ NOESY of 3p':

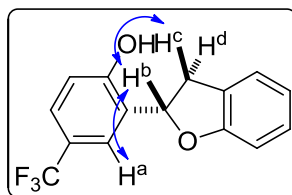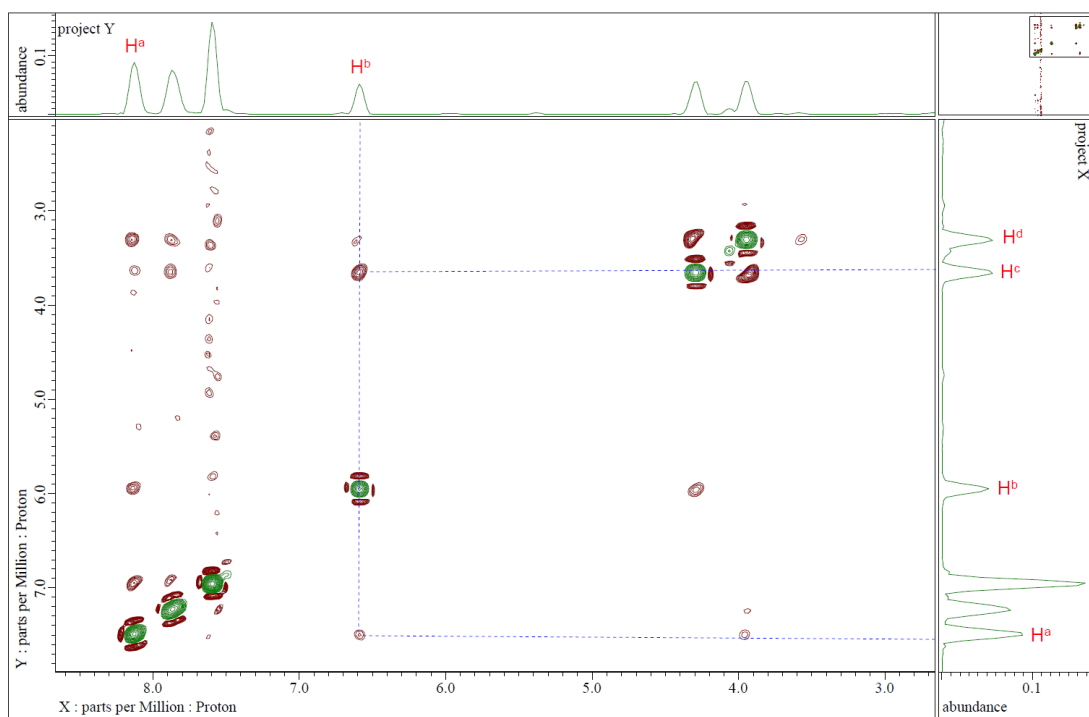

**3q**-<sup>1</sup>H NMR (400 MHz, CD<sub>3</sub>OD)

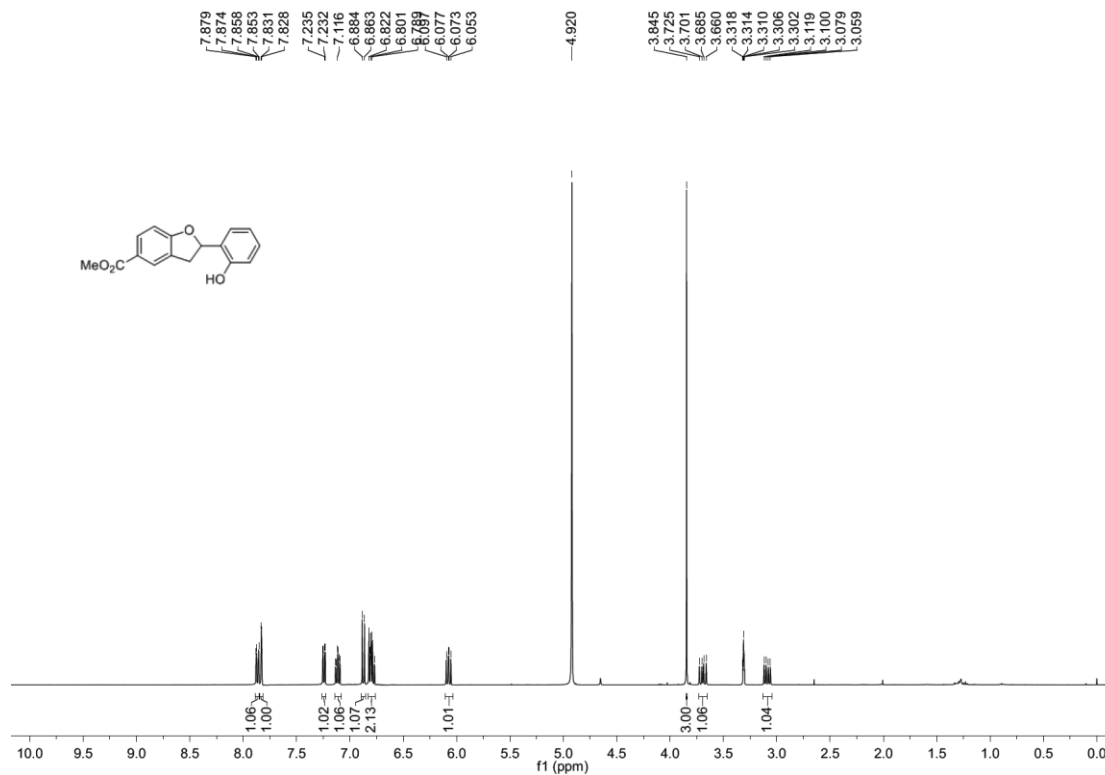

**3q**-<sup>13</sup>C NMR (100 MHz, CD<sub>3</sub>OD)

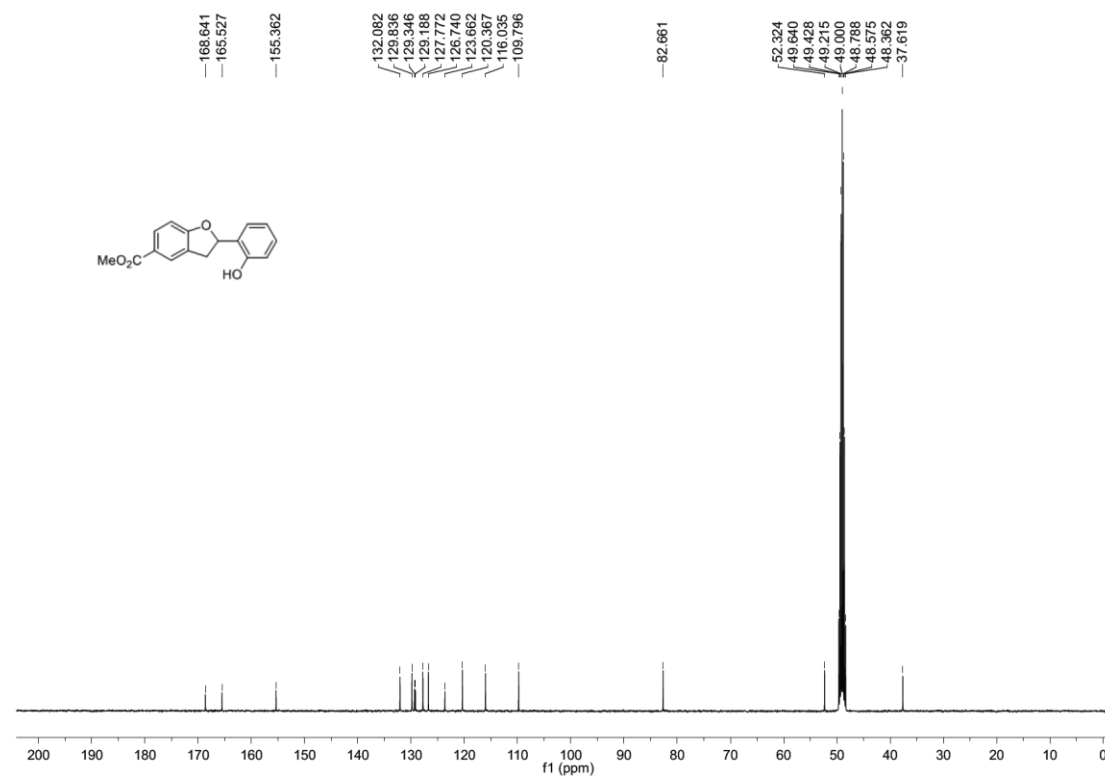

**3q'**-<sup>1</sup>H NMR (400 MHz, CDCl<sub>3</sub>)

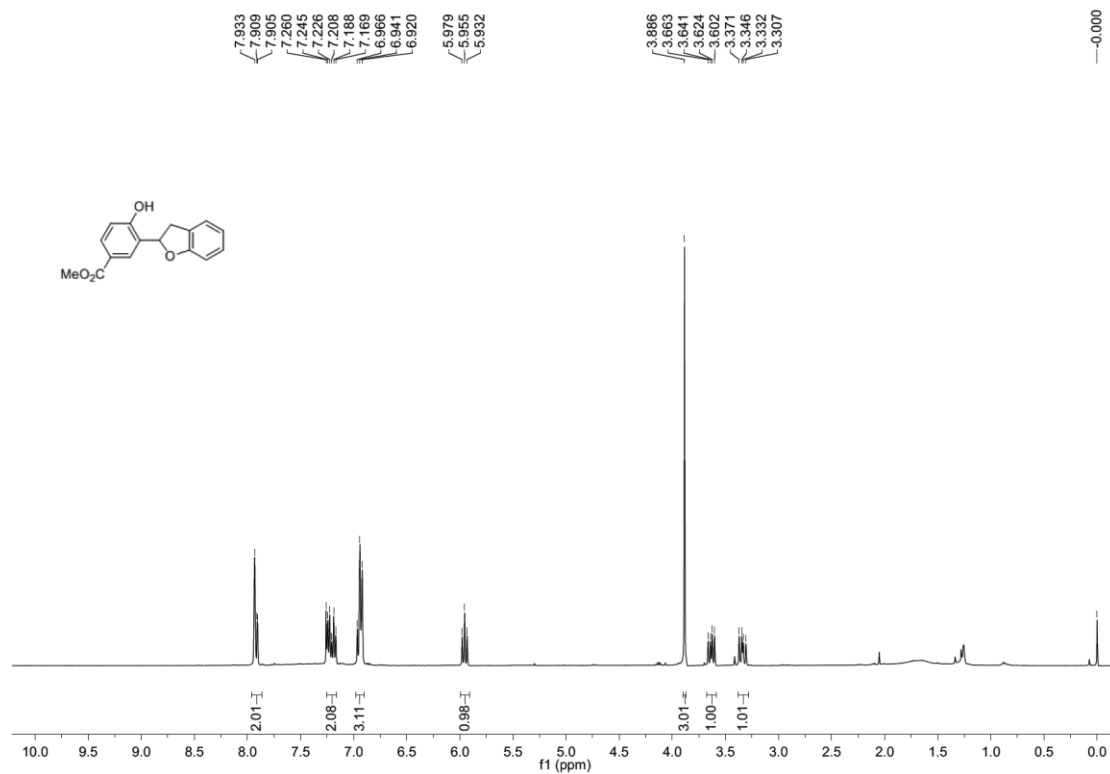

**3q'**-<sup>13</sup>C NMR (100 MHz, CDCl<sub>3</sub>)

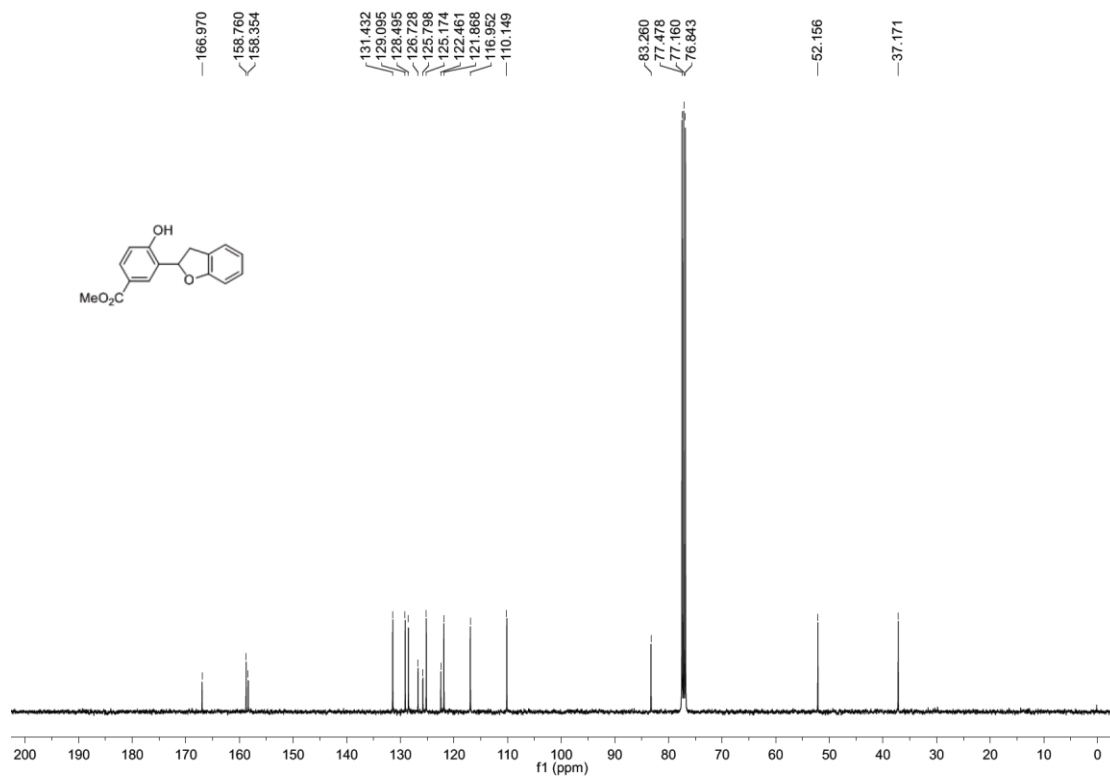

**3r-<sup>1</sup>H NMR (400 MHz, CD<sub>3</sub>OD)**

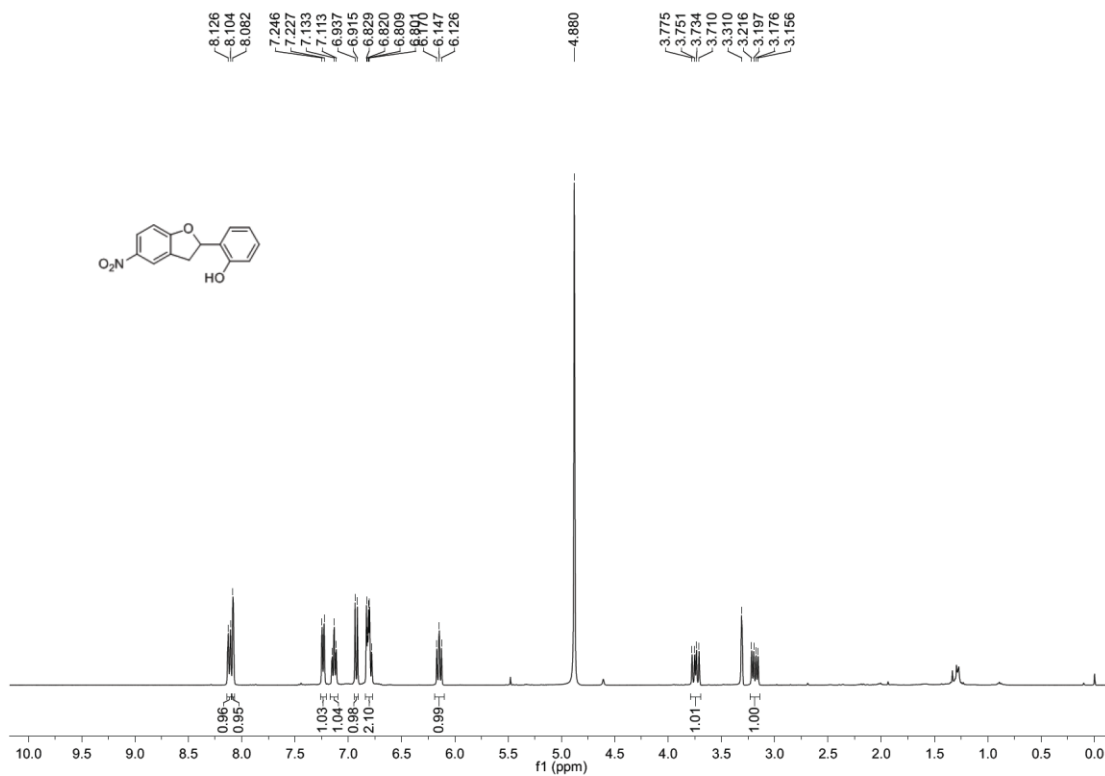

**3r-<sup>13</sup>C NMR (100 MHz, CD<sub>3</sub>OD)**

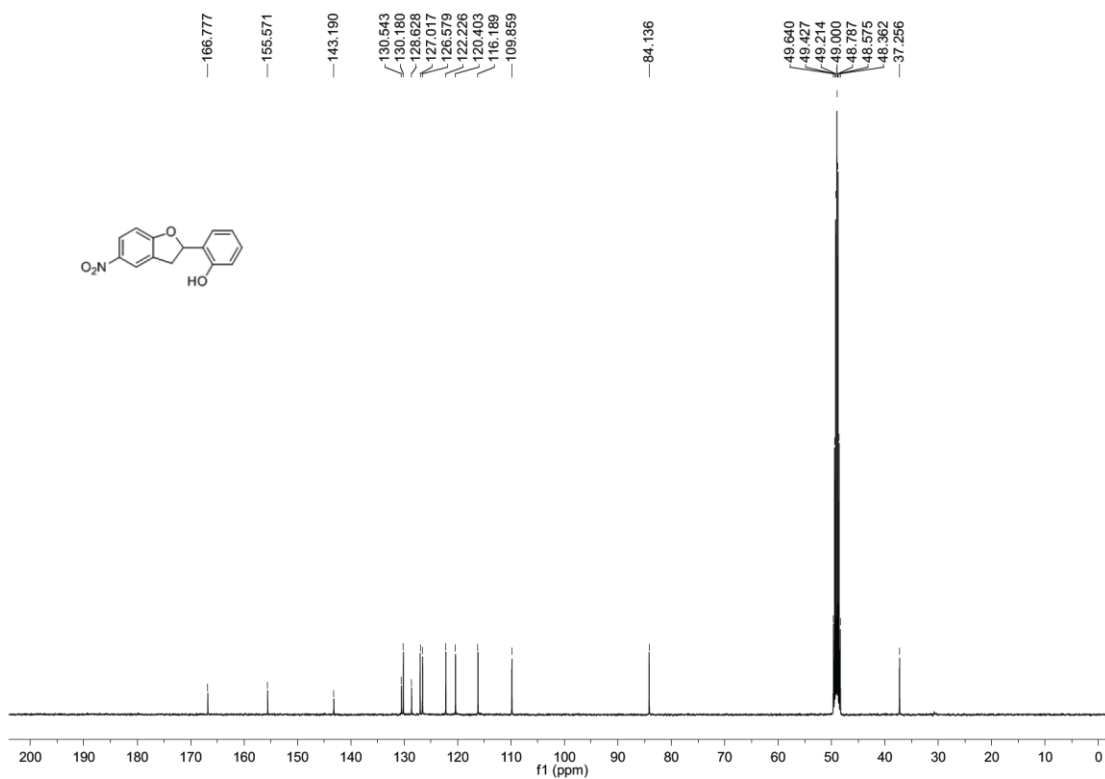

$^1\text{H}$ - $^1\text{H}$  NOESY of 3r:

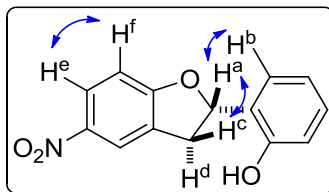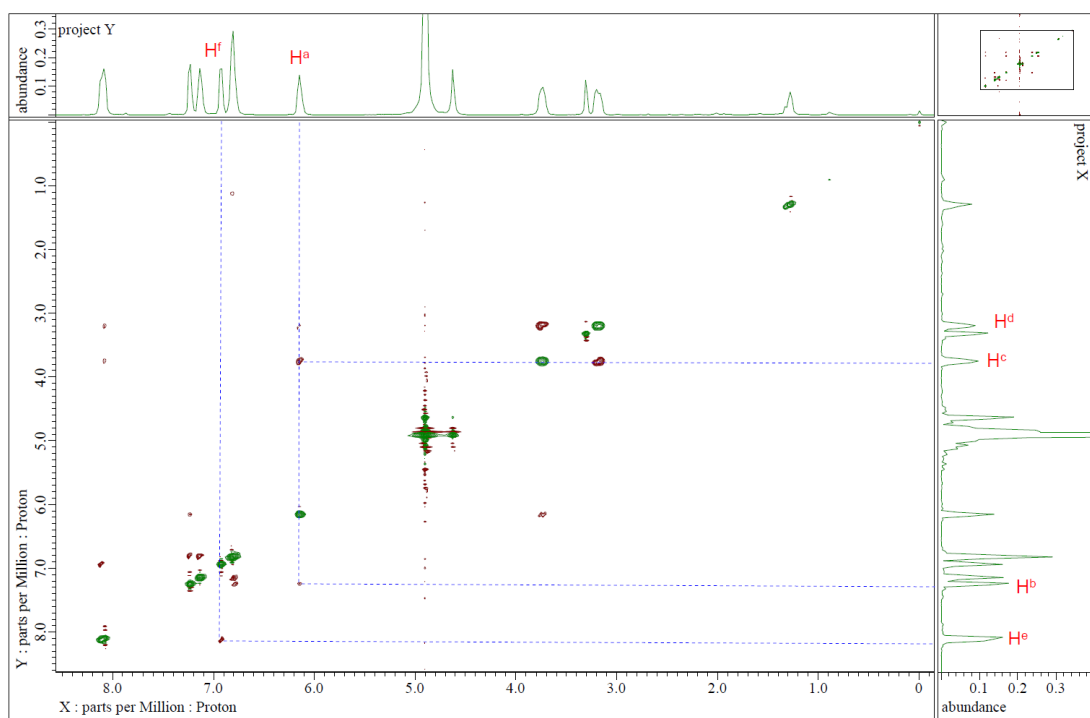

**3r'**-<sup>1</sup>H NMR (400 MHz, CD<sub>3</sub>OD)

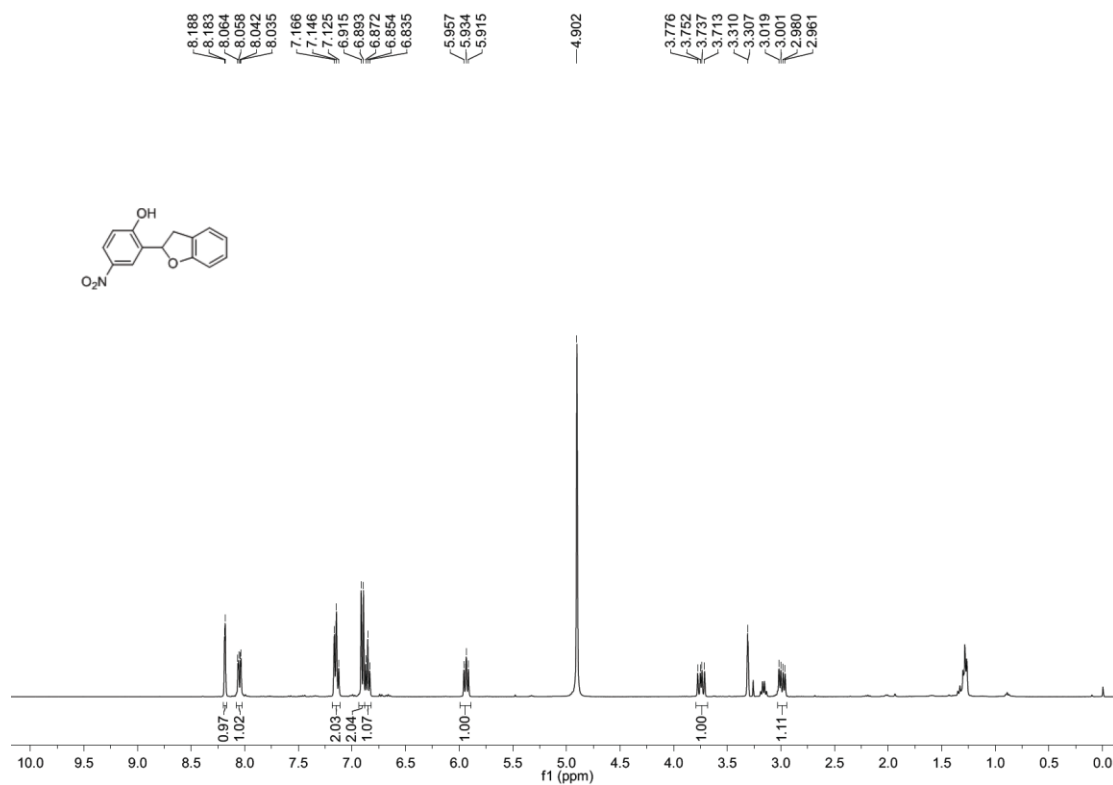

**3r'**-<sup>13</sup>C NMR (100 MHz, CD<sub>3</sub>OD)

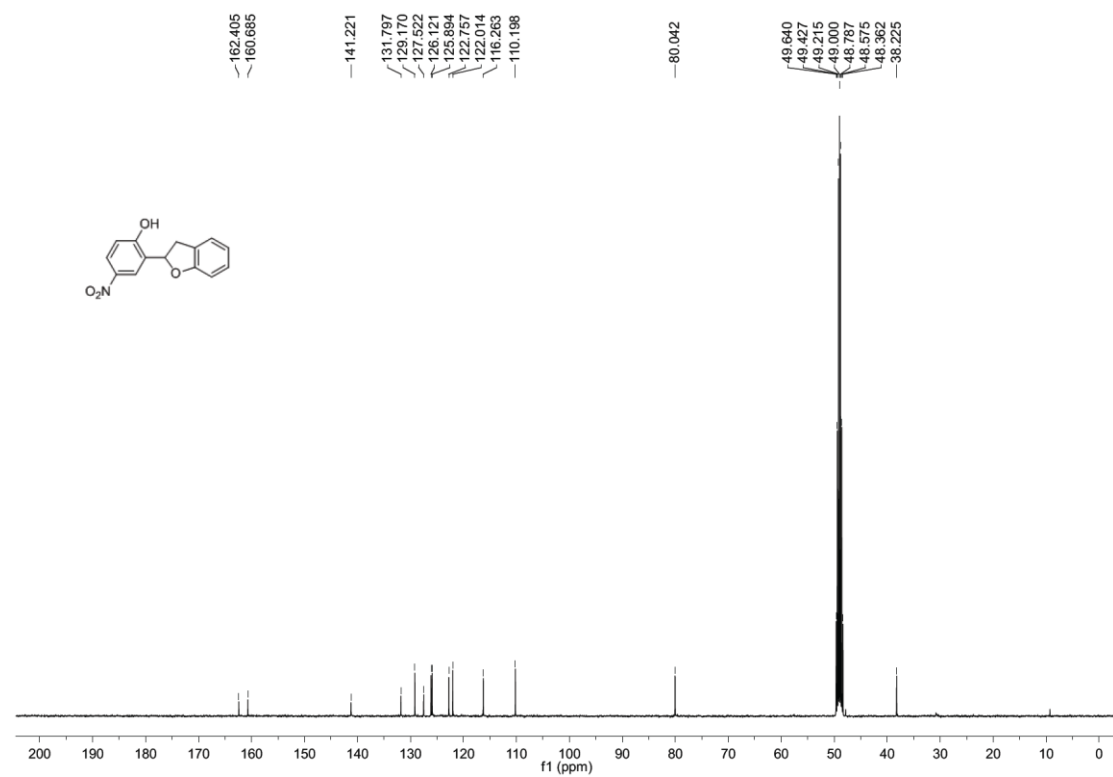



# $^1\text{H}$ - $^1\text{H}$ NOESY of 3r':

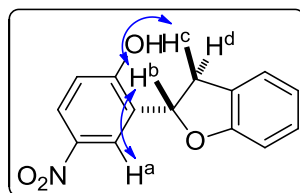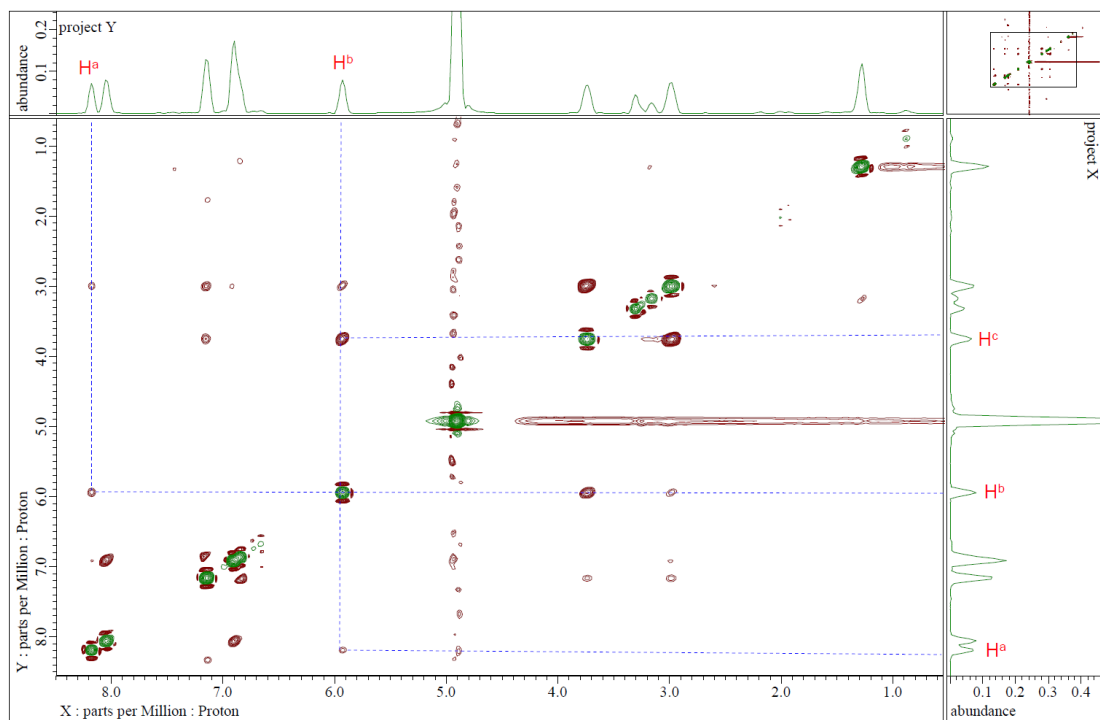

**3s-<sup>1</sup>H NMR (400 MHz, CDCl<sub>3</sub>)**

7.771, 7.744, 7.731, 7.712, 7.680, 7.654, 7.421, 7.404, 7.385, 7.339, 7.320, 7.302, 7.272, 7.253, 7.229, 7.204, 7.178, 6.979, 6.946, 6.927, 6.903, 6.882, 6.104, 6.081, 6.058, 6.031, 6.009, 5.987

3.770, 3.748, 3.730, 3.709, 3.680, 3.658, 3.494, 3.471, 3.454, 3.431, 3.382, 3.366, 3.343

0.000

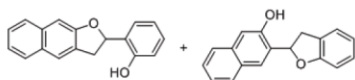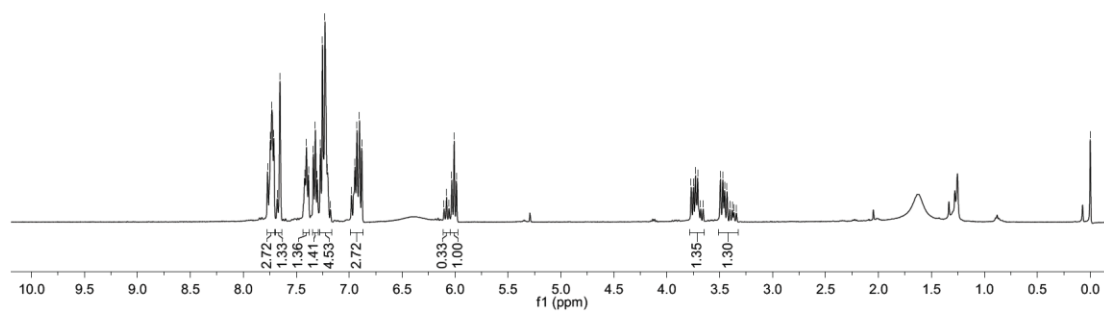

**3s-<sup>13</sup>C NMR (100 MHz, CDCl<sub>3</sub>)**

158.926, 157.489, 154.134, 152.081, 134.470, 130.115, 129.556, 129.371, 128.377, 127.773, 127.083, 126.996, 126.696, 126.269, 126.155, 126.069, 126.020, 125.194, 124.021, 123.833, 123.817, 120.736, 116.868, 108.987, 83.582, 82.837, 77.478, 77.160, 76.843, 37.159, 36.736

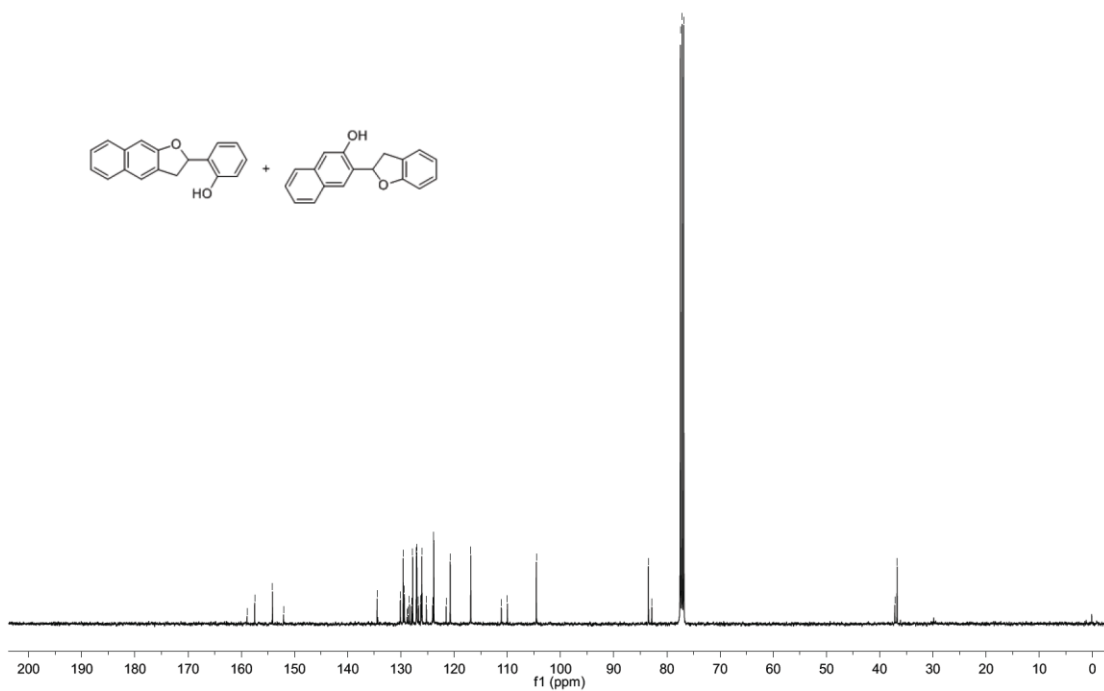

**3t-<sup>1</sup>H NMR (400 MHz, CDCl<sub>3</sub>)**

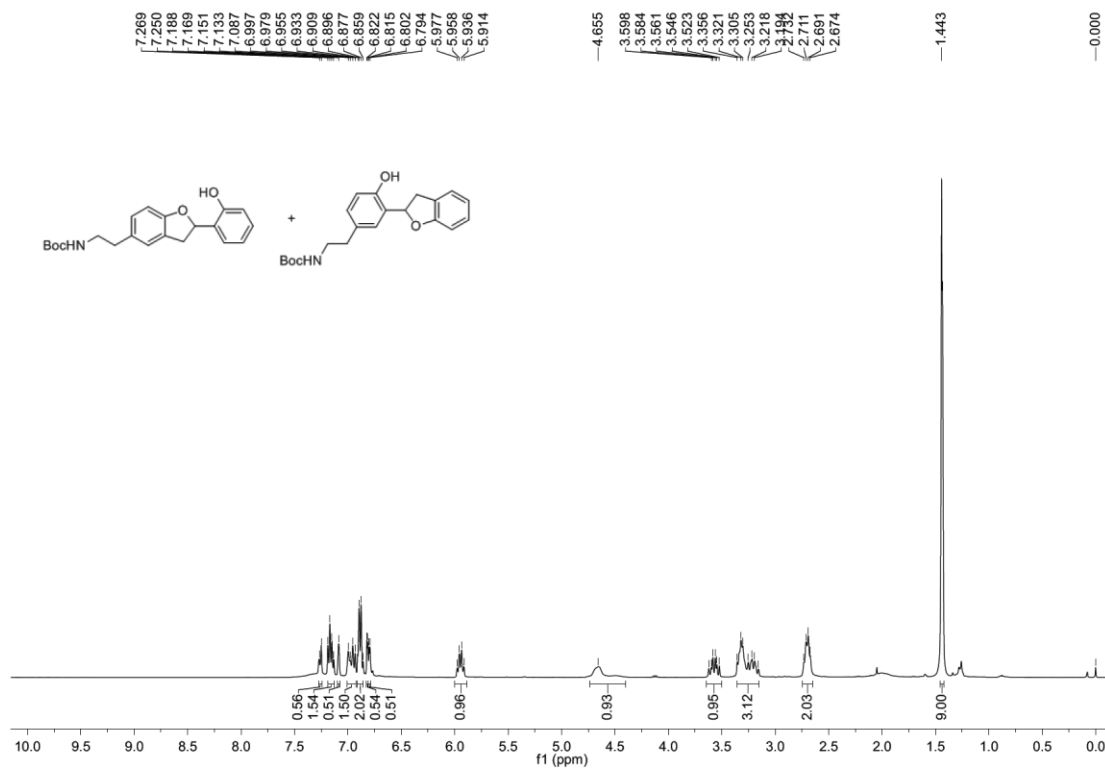

**3t-<sup>13</sup>C NMR (100 MHz, CDCl<sub>3</sub>)**

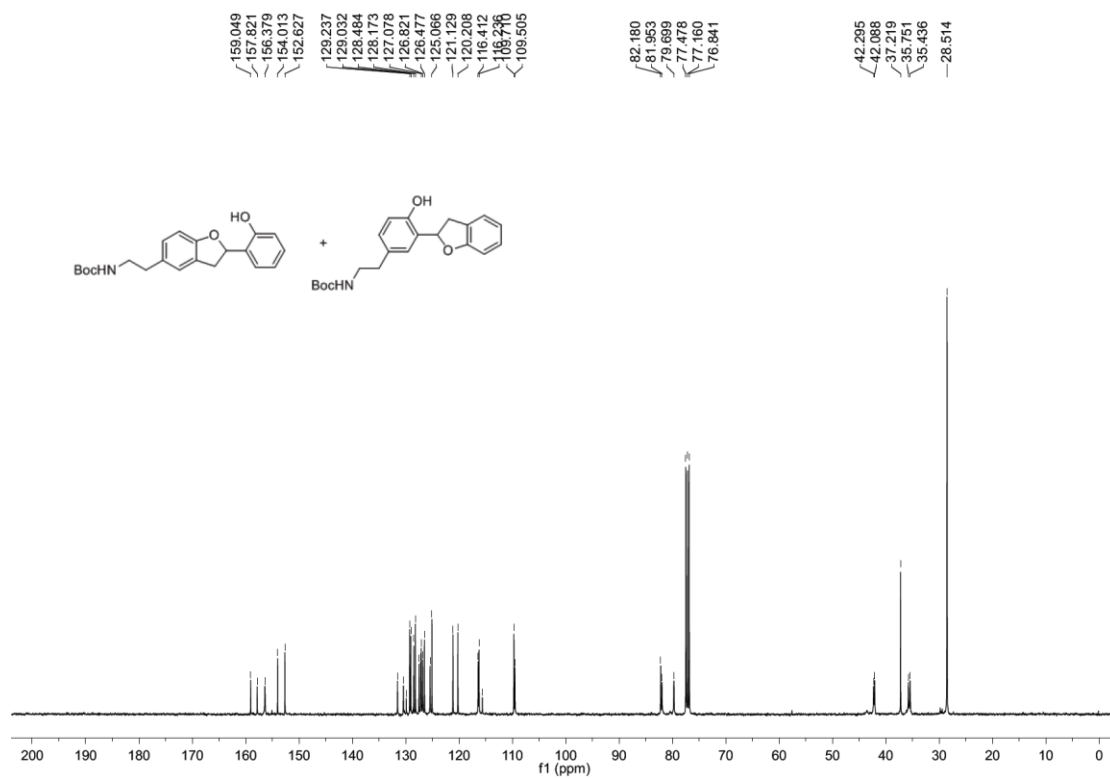

**3u-<sup>1</sup>H NMR (400 MHz, CDCl<sub>3</sub>)**

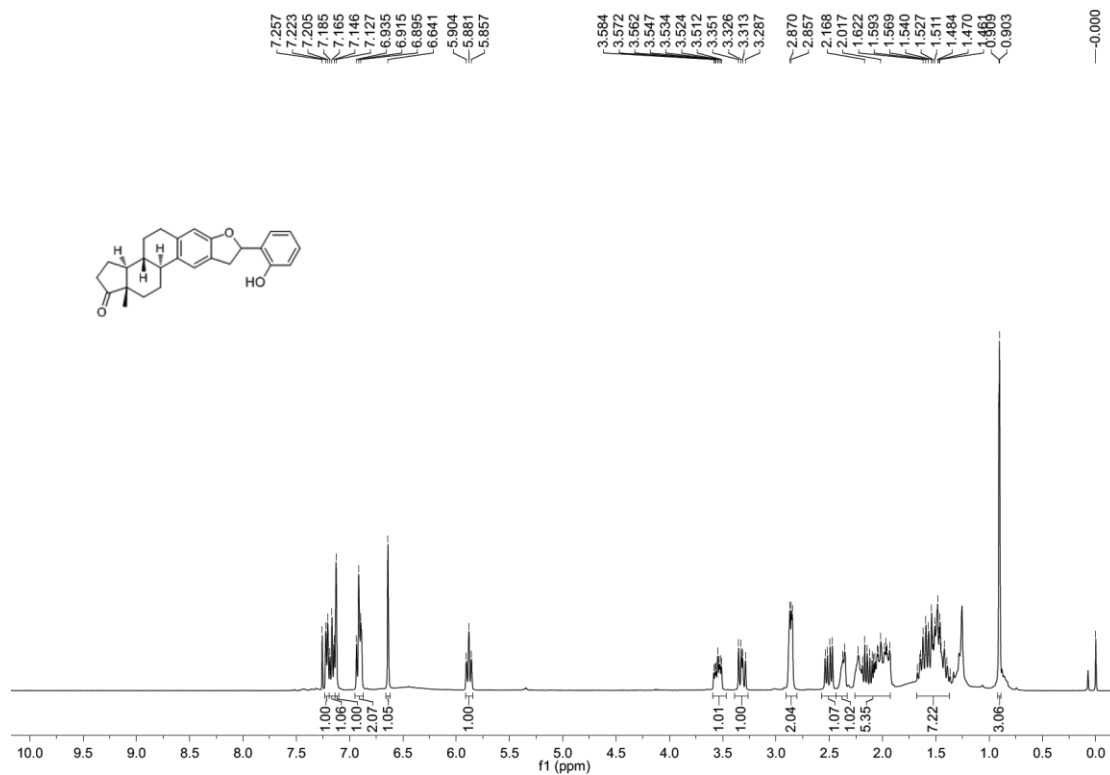

**3u-<sup>13</sup>C NMR (100 MHz, CDCl<sub>3</sub>)**

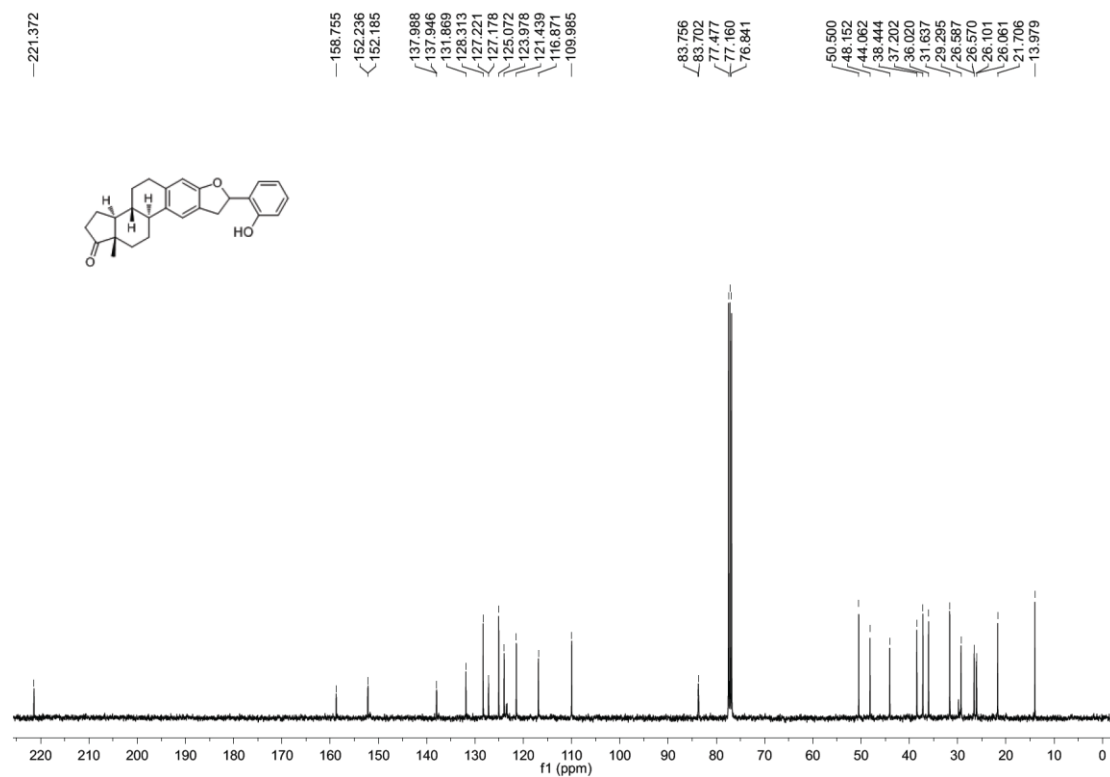

**3u'** -  $^1\text{H}$  NMR (400 MHz,  $\text{CDCl}_3$ )

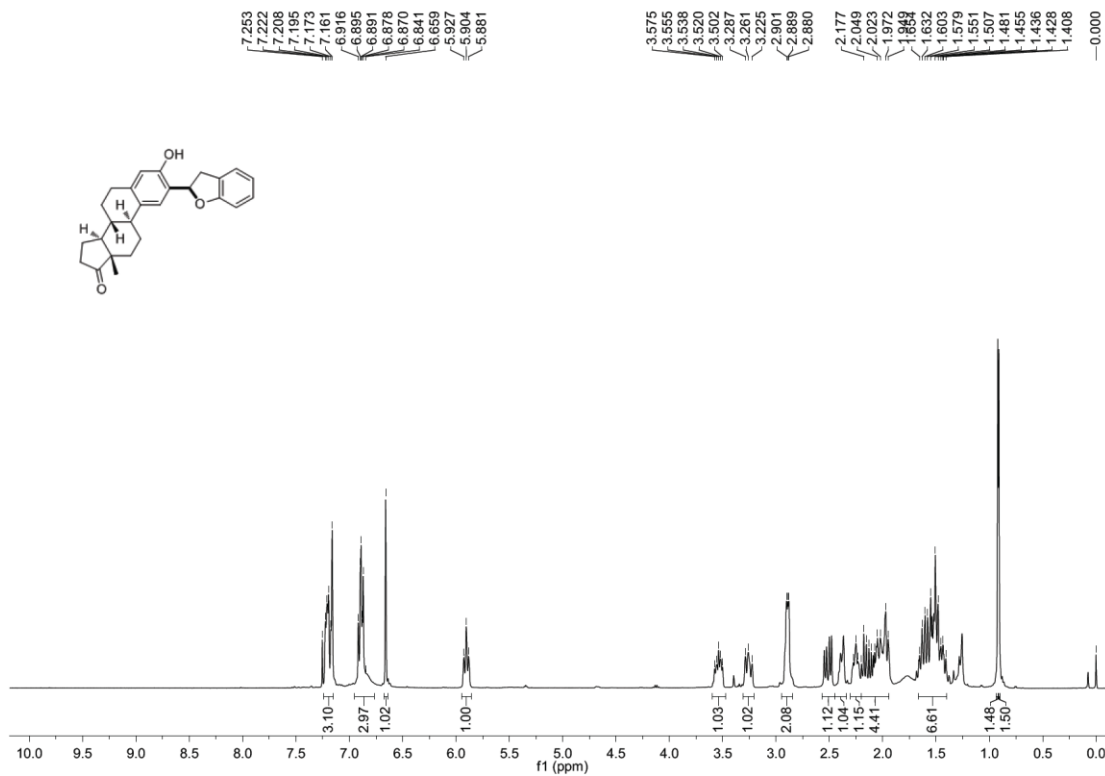

**3u'** -  $^{13}\text{C}$  NMR (100 MHz,  $\text{CDCl}_3$ )

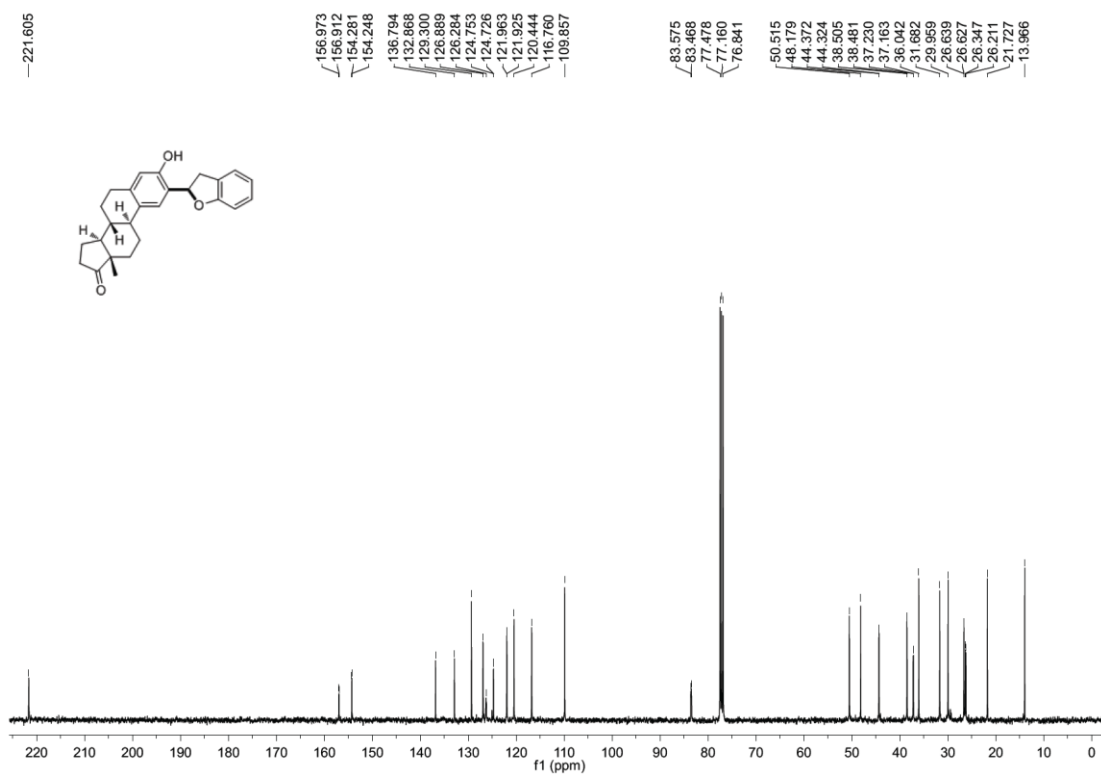

4-<sup>1</sup>H NMR (400 MHz, CDCl<sub>3</sub>)

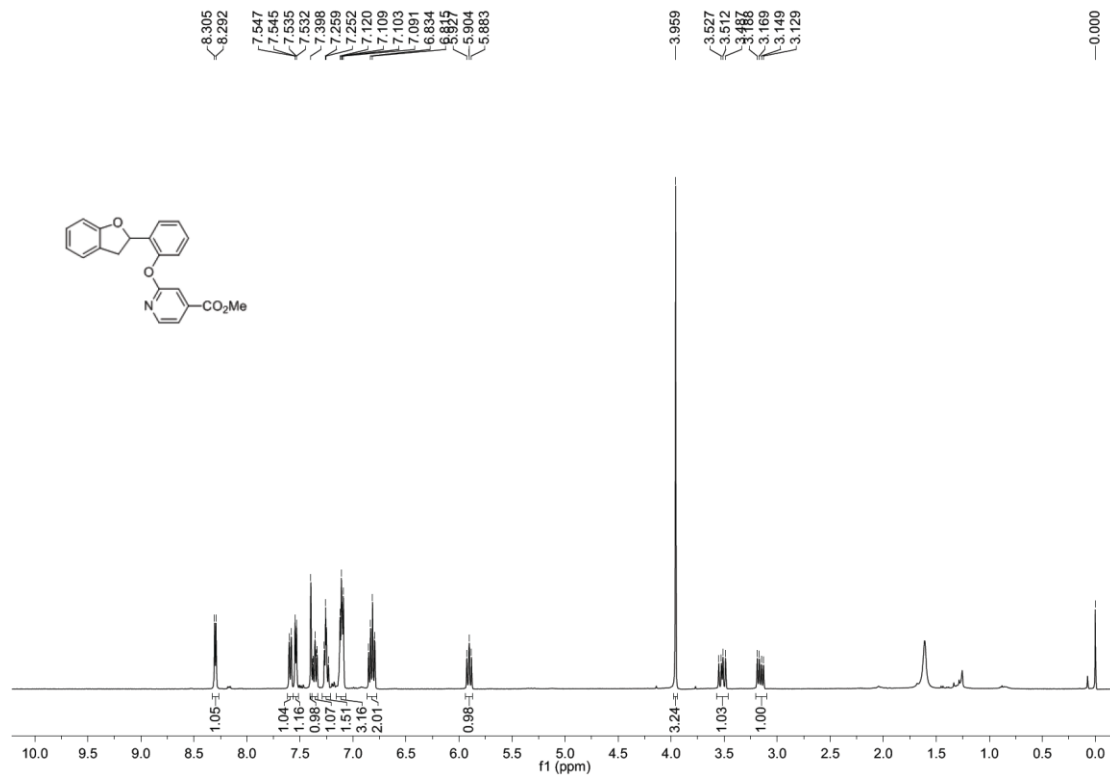

4-<sup>13</sup>C NMR (100 MHz, CDCl<sub>3</sub>)

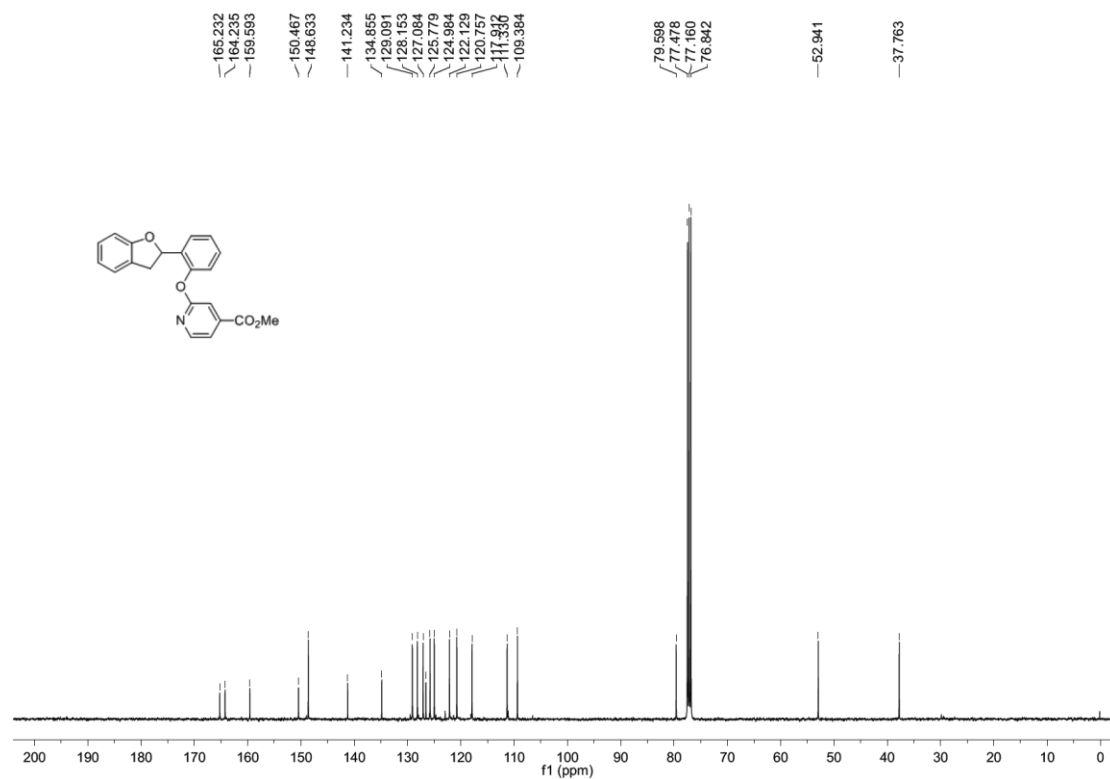

**5-<sup>1</sup>H NMR (400 MHz, CDCl<sub>3</sub>)**

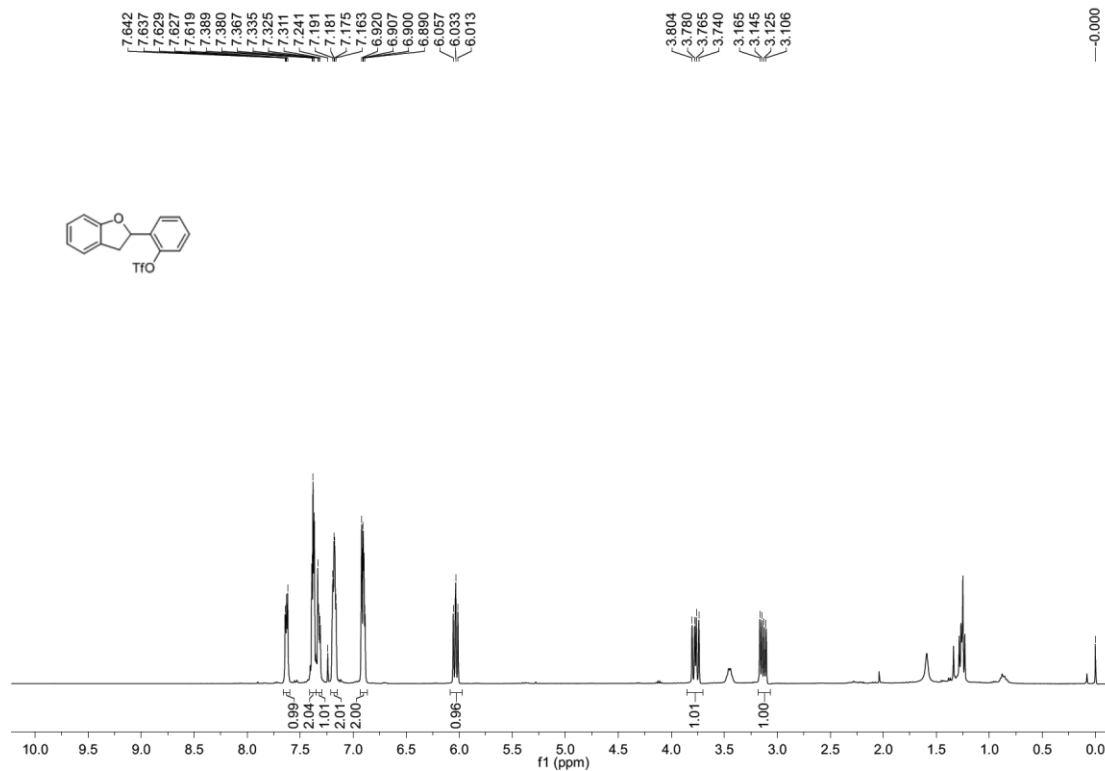

**5-<sup>13</sup>C NMR (100 MHz, CDCl<sub>3</sub>)**

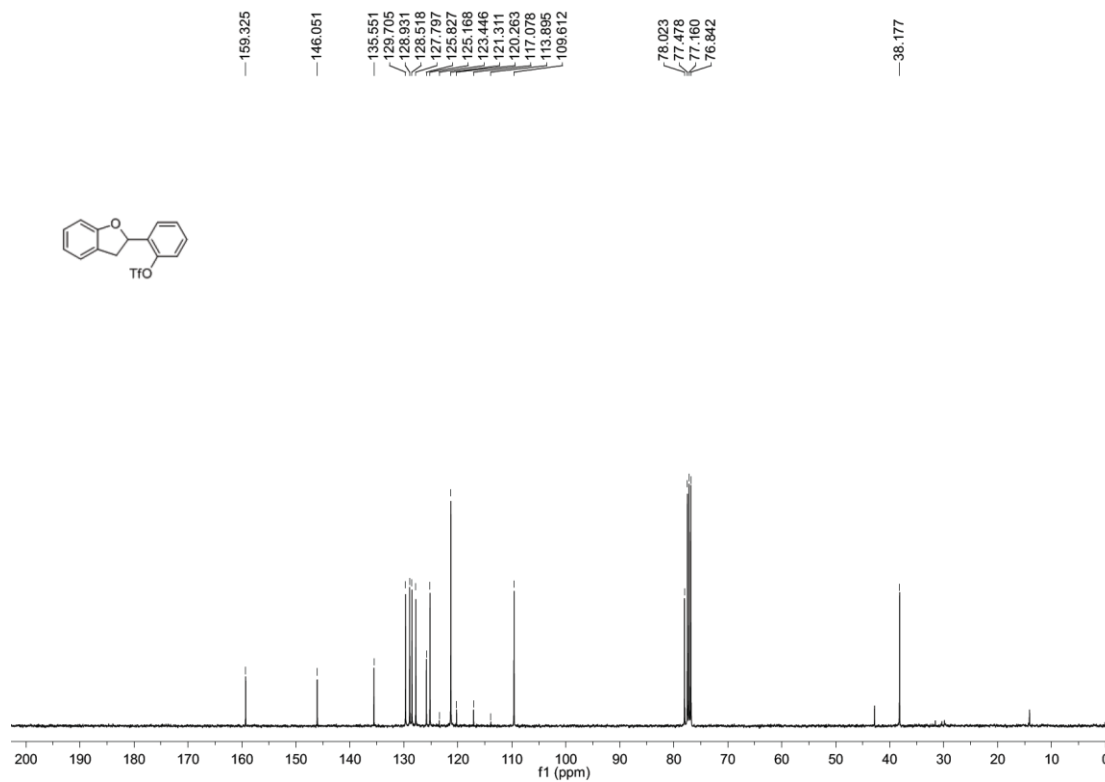

5-<sup>19</sup>F NMR (376 MHz, CDCl<sub>3</sub>)

---73.610

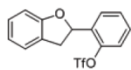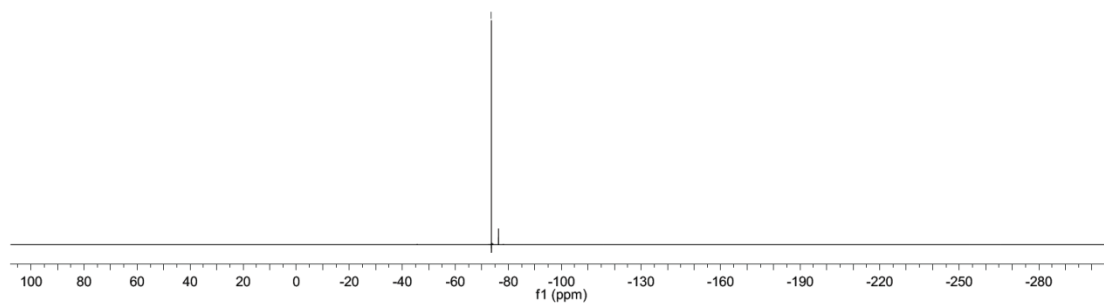



**6-<sup>1</sup>H NMR (400 MHz, CDCl<sub>3</sub>)**

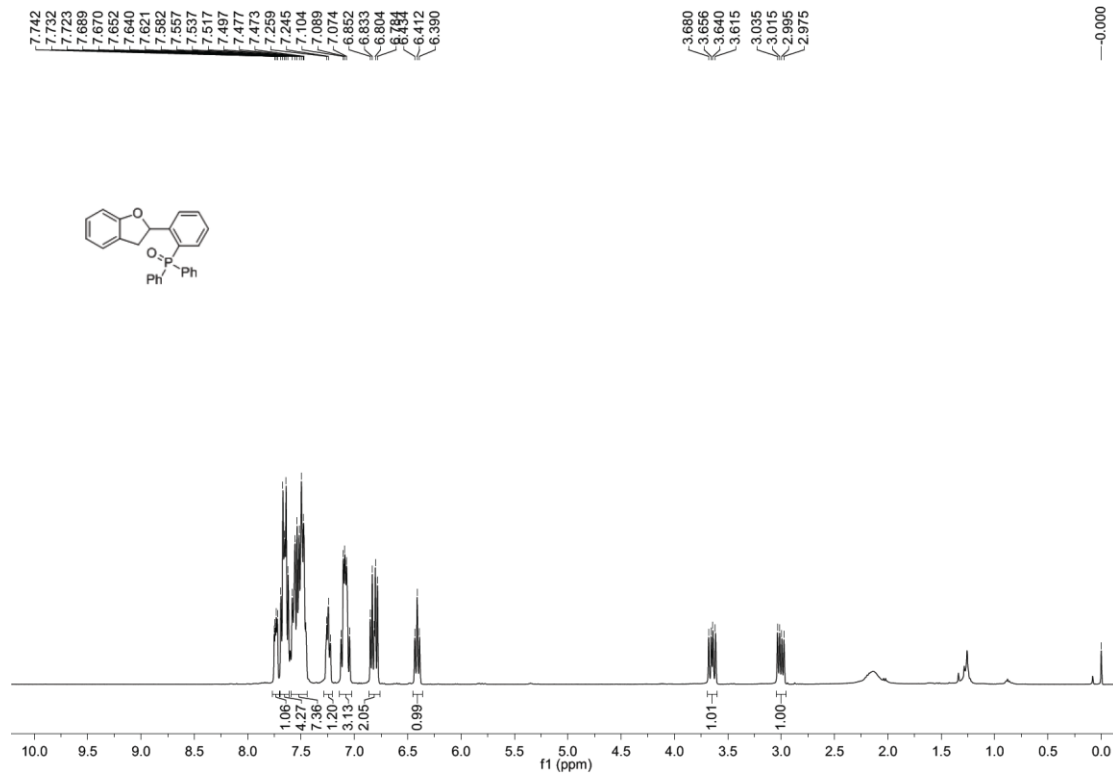

**6-<sup>13</sup>C NMR (100 MHz, CDCl<sub>3</sub>)**

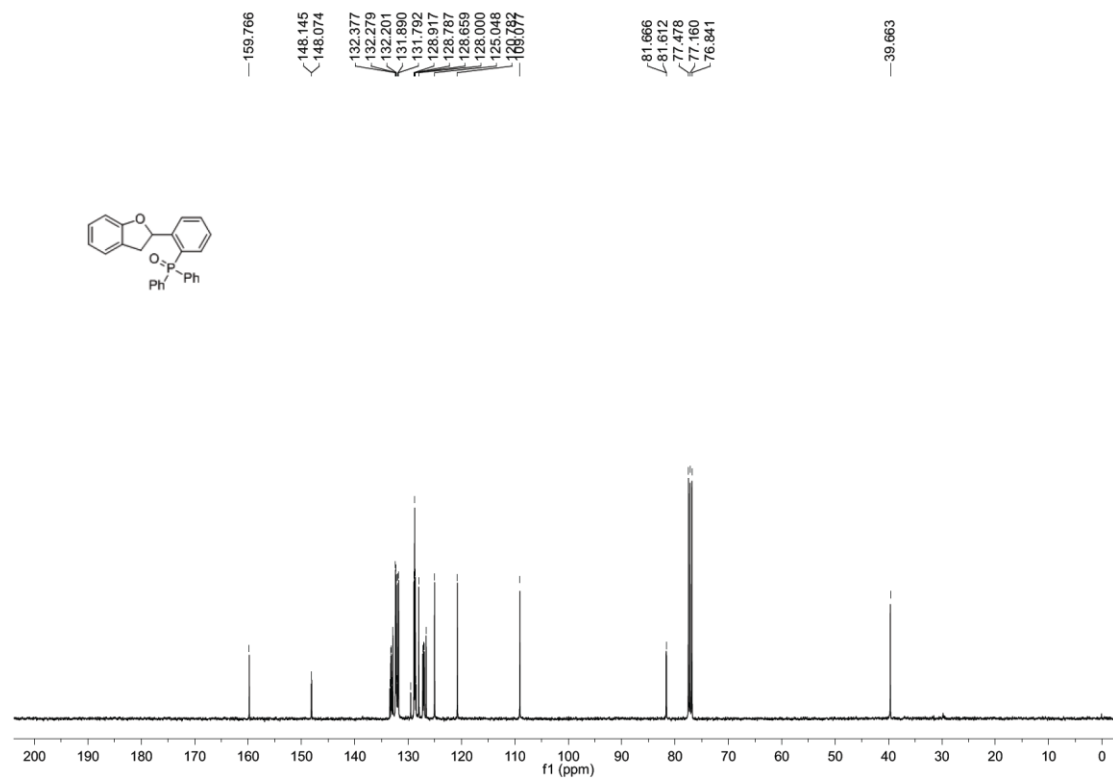

**6**-<sup>31</sup>P NMR (162 MHz, CDCl<sub>3</sub>)

-32.222

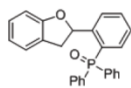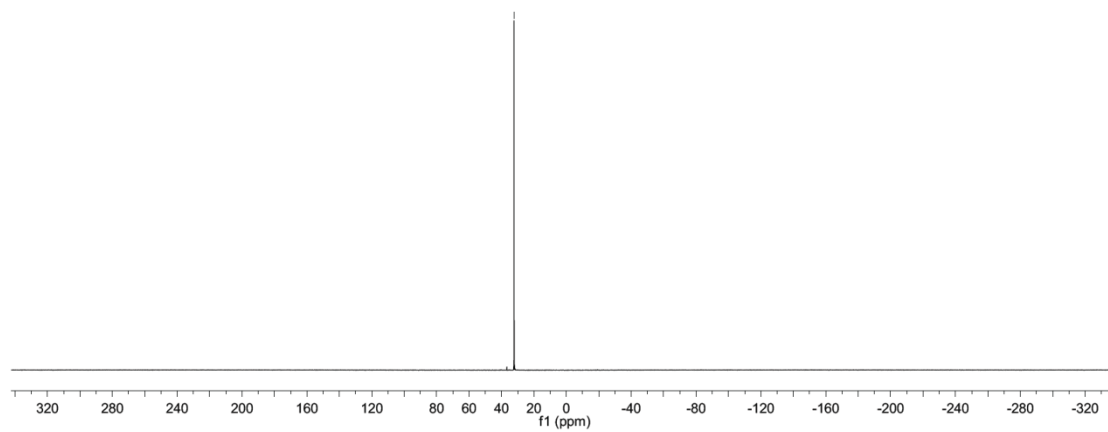

7-<sup>1</sup>H NMR (400 MHz, CDCl<sub>3</sub>)

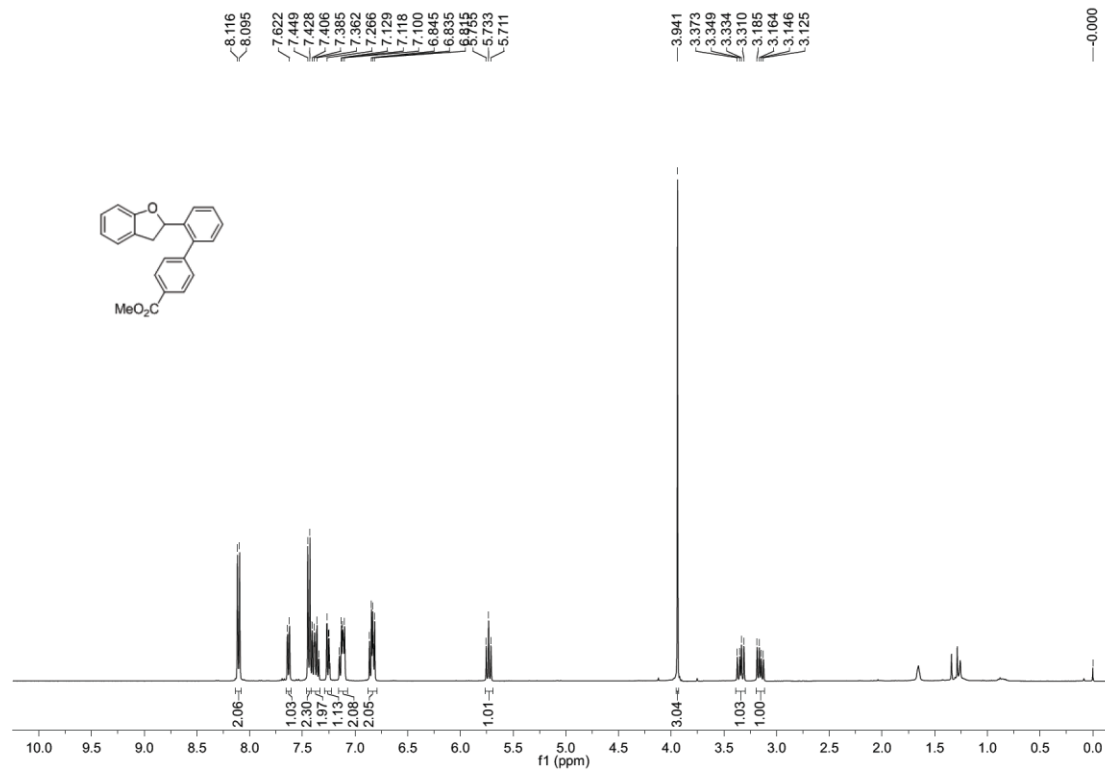

7-<sup>13</sup>C NMR (100 MHz, CDCl<sub>3</sub>)

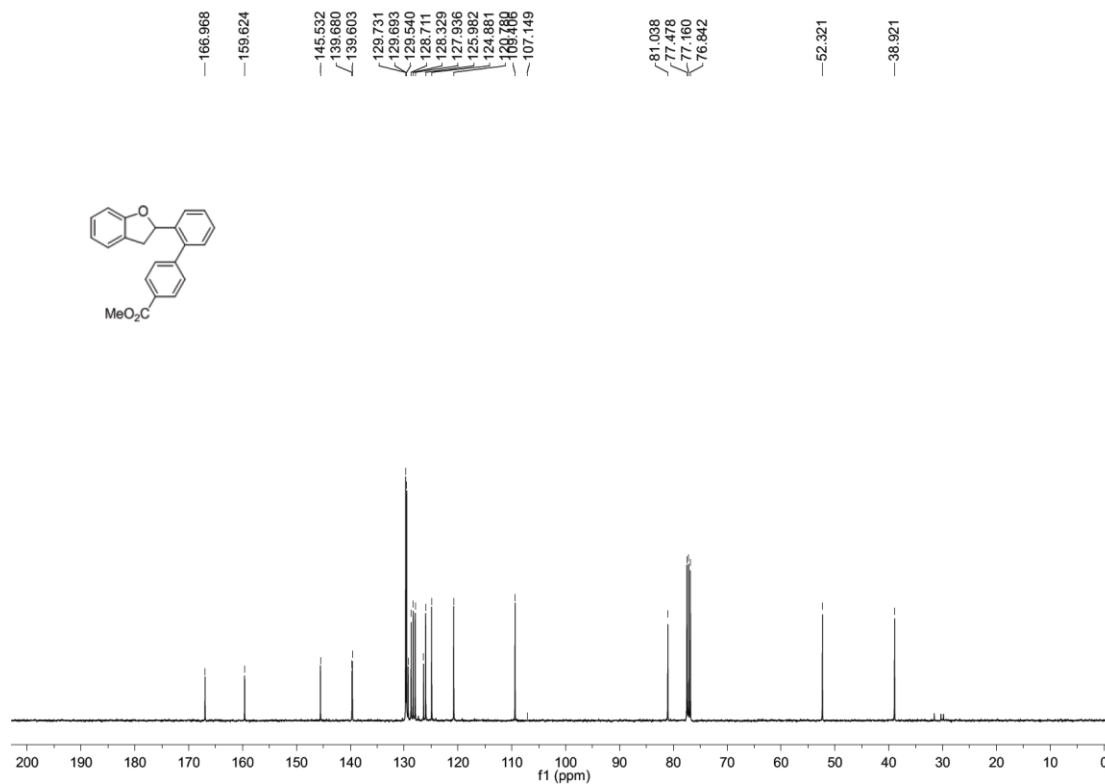

**8-<sup>1</sup>H NMR (400 MHz, CDCl<sub>3</sub>)**

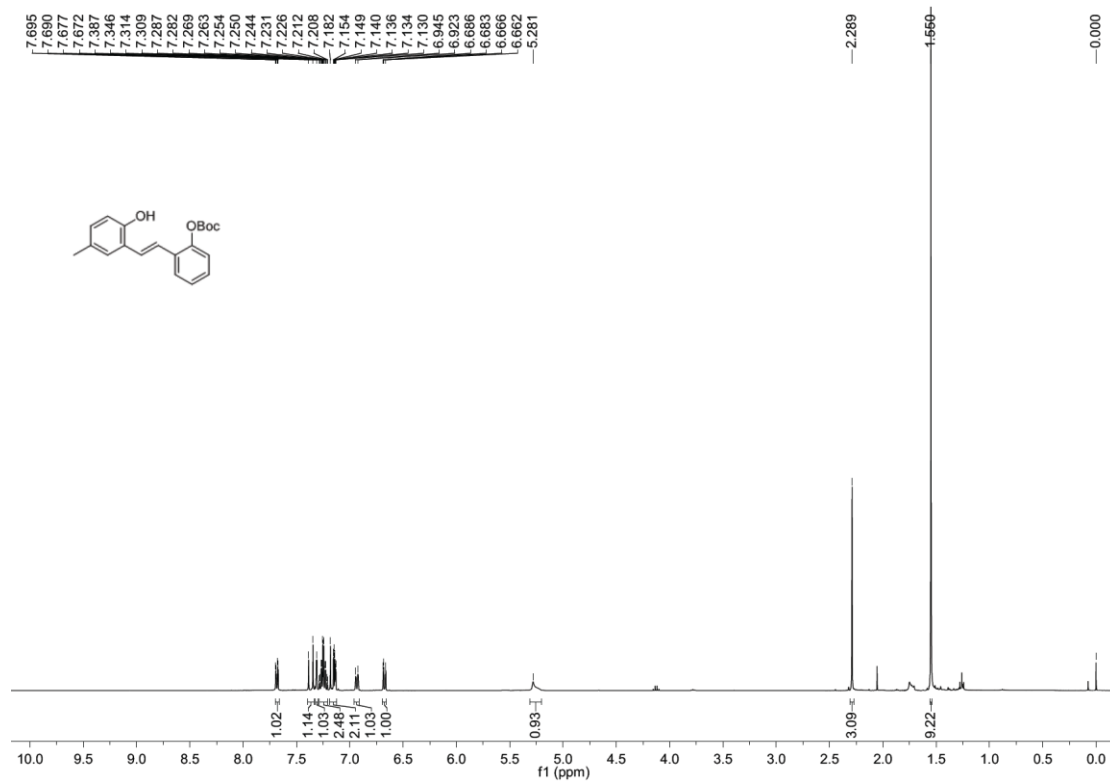

**8-<sup>13</sup>C NMR (100 MHz, CDCl<sub>3</sub>)**

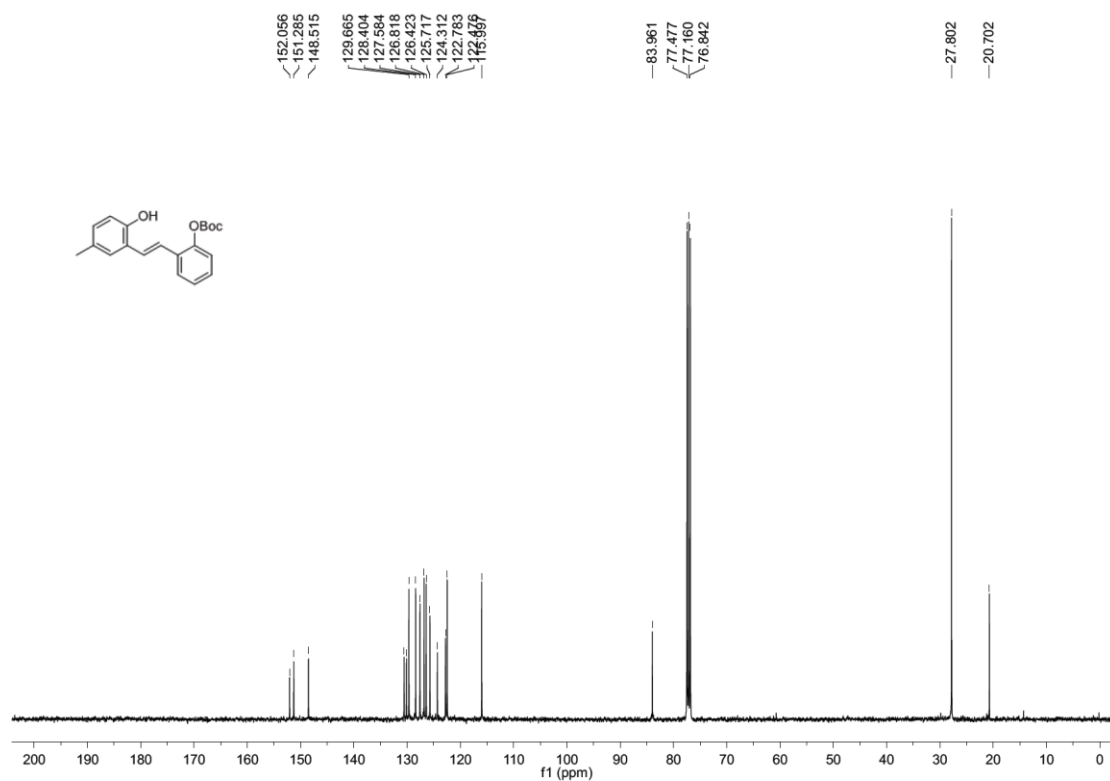

**11-<sup>1</sup>H NMR (400 MHz, CDCl<sub>3</sub>)**

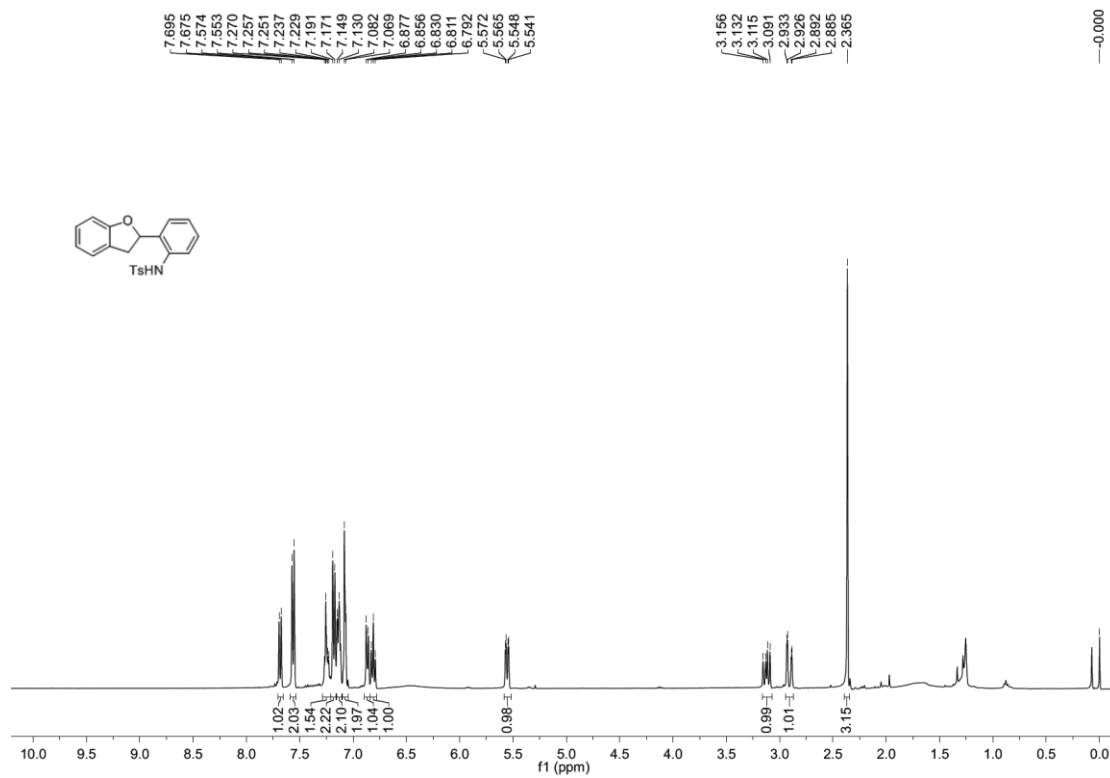

**11-<sup>13</sup>C NMR (100 MHz, CDCl<sub>3</sub>)**

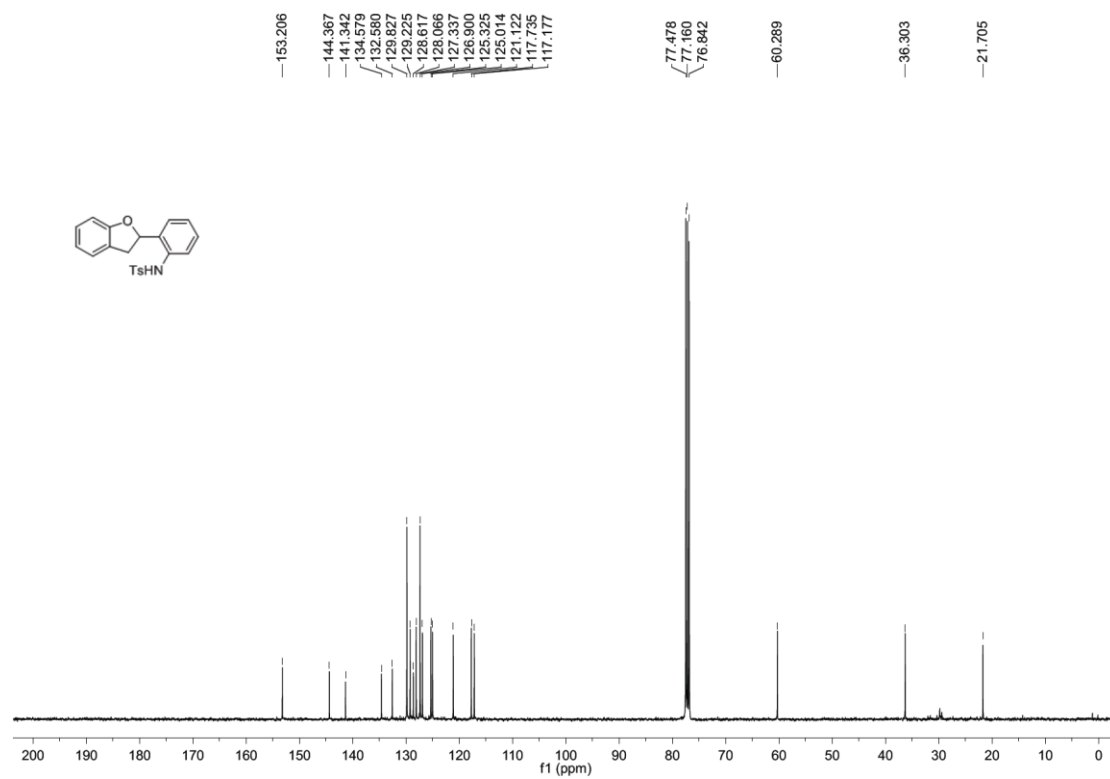

Supplement: d2nj00175f1.pdf [file d2nj00175f1.pdf]
